# Supplementary material
Source: publisher figshare collection journal article supplement (https://diabetesjournals.figshare.com/articles/dataset/_/23925765)
Supplement: Supplementary file 1 [file 1]

Supplemental Table 1: Information for donors from the Human Panceas Analysis Program (HPAP)

| Donor ID | RRID              | Sex    | BMI   | Age (Years) | Ancestry         | Diabetes Status | Disease Duration (Years) | HbA1c | Tissue Source | 10X Kit Chemistry |
|----------|-------------------|--------|-------|-------------|------------------|-----------------|--------------------------|-------|---------------|-------------------|
| HPAP-019 | RRID:SAMN19776450 | Male   | 29.8  | 22          | Caucasian        | AAB             |                          | 5.2   | nPod          | 10x v2            |
| HPAP-020 | RRID:SAMN19776451 | Male   | 13.2  | 14          | Caucasian        | T1D             |                          | NA    | nPod          | 10x v2            |
| HPAP-021 | RRID:SAMN19776452 | Female | 21.4  | 13          | Caucasian        | T1D             | 7                        | NA    | nPod          | 10x v2            |
| HPAP-022 | RRID:SAMN19776453 | Female | 34.7  | 39          | Caucasian        | ND              |                          | 4.7   | UPenn         | 10x v2            |
| HPAP-023 | RRID:SAMN19776454 | Female | 21.35 | 17          | Caucasian        | T1D             | 7                        | 8.9   | nPod          | 10x v2            |
| HPAP-024 | RRID:SAMN19776455 | Male   | 24.3  | 18          | Caucasian        | AAB             |                          | 5.5   | nPod          | 10x v2            |
| HPAP-026 | RRID:SAMN19776457 | Male   | 20.8  | 24          | Caucasian        | ND              |                          | 4.9   | nPod          | 10x v2            |
| HPAP-027 | RRID:SAMN19776458 | Female | 32.71 | 31          | Caucasian        | ND              |                          | 4.4   | UPenn         | 10x v2            |
| HPAP-028 | RRID:SAMN19776459 | Male   | 17.3  | 4           | Caucasian        | T1D             | 3                        | 9.8   | nPod          | 10x v2            |
| HPAP-029 | RRID:SAMN19776460 | Male   | 28.6  | 23          | Caucasian        | AAB             |                          | 5.3   | nPod          | 10x v2            |
| HPAP-032 | RRID:SAMN19776463 | Female | 16.3  | 10          | Caucasian        | T1D             | 3                        | 9     | nPod          | 10x v2            |
| HPAP-034 | RRID:SAMN19776465 | Male   | 18.6  | 13          | Caucasian        | ND              |                          | 5.2   | UPenn         | 10x v2            |
| HPAP-035 | RRID:SAMN19776466 | Male   | 26.91 | 35          | Caucasian        | ND              |                          | 5.2   | UPenn         | 10x v2            |
| HPAP-036 | RRID:SAMN19776467 | Female | 16    | 23          | Caucasian        | ND              |                          | 5.2   | nPod          | 10x v2            |
| HPAP-037 | RRID:SAMN19776468 | Female | 21.9  | 35          | Caucasian        | ND              |                          | 5.3   | UPenn         | 10x v2            |
| HPAP-038 | RRID:SAMN19776469 | Male   | 18.34 | 13          | Caucasian        | AAB             |                          | 5.7   | nPod          | 10x v3            |
| HPAP-039 | RRID:SAMN19776470 | Female | 16.3  | 5           | Caucasian        | ND              |                          | 6.8   | nPod          | 10x v3            |
| HPAP-040 | RRID:SAMN19776471 | Male   | 23.98 | 35          | Caucasian        | ND              |                          | 5.4   | UPenn         | 10x v3            |
| HPAP-042 | RRID:SAMN19776473 | Male   | 17.9  | 1           | Caucasian        | ND              |                          | 5.6   | nPod          | 10x v3            |
| HPAP-043 | RRID:SAMN19776474 | Male   | 24.07 | 15          | Hispanic         | AAB             |                          | 5.9   | nPod          | 10x v3            |
| HPAP-044 | RRID:SAMN19776475 | Female | 12    | 3           | Caucasian        | ND              |                          | 5.3   | nPod          | 10x v3            |
| HPAP-045 | RRID:SAMN19776476 | Female | 26.2  | 27          | Caucasian        | AAB             |                          | 5.2   | nPod          | 10x v3            |
| HPAP-047 | RRID:SAMN19776478 | Male   | 16.82 | 8           | Caucasian        | ND              |                          | NA    | UPenn         | 10x v3            |
| HPAP-049 | RRID:SAMN19776480 | Male   | 37.2  | 29          | Caucasian        | AAB             |                          | 5.4   | nPod          | 10x v3            |
| HPAP-050 | RRID:SAMN19776481 | Female | 28.99 | 21          | Hispanic         | AAB             |                          | 5.1   | nPod          | 10x v3            |
| HPAP-051 | RRID:SAMN18741940 | Female | 45.49 | 43          | African American | T2D             | 5-6                      | 6.7   | UPenn         | 10x v3            |
| HPAP-052 | RRID:SAMN19776482 | Male   | 38.72 | 27          | African American | ND              |                          | 5.2   | UPenn         | 10x v3            |
| HPAP-053 | RRID:SAMN19776483 | Female | 24.2  | 58          | Caucasian        | ND              |                          | 5.6   | UPenn         | 10x v3            |
| HPAP-054 | RRID:SAMN19776484 | Female | 30.85 | 40          | Caucasian        | ND              |                          | 4.8   | UPenn         | 10x v3            |
| HPAP-055 | RRID:SAMN19776485 | Male   | 27.9  | 24          | Hispanic         | T1D             | 7                        | 10.4  | UPenn         | 10x v3            |
| HPAP-056 | RRID:SAMN19842585 | Male   | 32.89 | 33          | Caucasian        | ND              |                          | 5.6   | UPenn         | 10x v3            |
| HPAP-057 | RRID:SAMN19842586 | Female | 30.49 | 50          | Caucasian        | T2D             | 0.666666667              | 5.8   | UPenn         | 10x v3            |
| HPAP-058 | RRID:SAMN19842587 | Female | 29.26 | 34          | African American | T2D             | <1                       | 9.4   | nPod          | 10x v3            |
| HPAP-059 | RRID:SAMN19842588 | Male   | 37.96 | 35          | Caucasian        | ND              |                          | NA    | UPenn         | 10x v3            |
| HPAP-061 | RRID:SAMN19842590 | Female | 38.27 | 59          | African American | T2D             |                          | 5.9   | UPenn         | 10x v3            |
| HPAP-063 | RRID:SAMN19842592 | Female | 38.41 | 45          | Caucasian        | ND              |                          | 6.3   | UPenn         | 10x v3            |
| HPAP-064 | RRID:SAMN19842593 | Male   | 16.98 | 24          | African American | T1D             |                          | NA    | UPenn         | 10x v3            |
| HPAP-065 | RRID:SAMN19842594 | Male   | 37.47 | 40          | African American | T2D             | 3                        | 9.5   | nPod          | 10x v3            |
| HPAP-070 | RRID:SAMN19842599 | Male   | 17.09 | 55          | African American | T2D             | 16                       | 7     | nPod          | 10x v3            |
| HPAP-071 | RRID:SAMN19842600 | Female | 15.42 | 12          | Caucasian        | T1D             | 3                        | 9.8   | nPod          | 10x v3            |
| HPAP-072 | RRID:SAMN19842601 | Male   | 23.1  | 19          | Hispanic         | AAB             |                          | 5.6   | nPod          | 10x v3            |
| HPAP-074 | RRID:SAMN19842603 | Female | 36.88 | 40          | Caucasian        | ND              |                          | 6.3   | UPenn         | 10x v3            |
| HPAP-075 | RRID:SAMN19842604 | Male   | 27.52 | 35          | Caucasian        | ND              |                          | 6     | UPenn         | 10x v3            |
| HPAP-077 | RRID:SAMN19842606 | Male   | 32.78 | 47          | Caucasian        | ND              |                          | 5.7   | UPenn         | 10x v3            |
| HPAP-079 | RRID:SAMN19842608 | Female | 28.38 | 52          | Hispanic         | T2D             | 10                       | 6.8   | nPod          | 10x v3            |
| HPAP-080 | RRID:SAMN19842609 | Male   | 35.71 | 22          | African American | ND              |                          | 5.4   | nPod          | 10x v3            |
| HPAP-081 | RRID:SAMN19842610 | Female | 28.91 | 45          | Caucasian        | T2D             | 20                       | 7.9   | nPod          | 10x v3            |
| HPAP-082 | RRID:SAMN19842611 | Male   | 23.96 | 25          | Caucasian        | ND              |                          | 5.6   | nPod          | 10x v3            |
| HPAP-083 | RRID:SAMN19842612 | Male   | 35.62 | 45          | African American | T2D             | 2-3                      | 5     | UPenn         | 10x v3            |
| HPAP-084 | RRID:SAMN19842613 | Female | 18.5  | 12          | Caucasian        | T1D             |                          | 13.3  | nPod          | 10x v3            |
| HPAP-085 | RRID:SAMN19842614 | Female | 39.78 | 48          | Caucasian        | T2D             | 6-10                     | NA    | UPenn         | 10x v3            |
| HPAP-087 | RRID:SAMN19842616 | Female | 19.3  | 15          | Caucasian        | T1D             | 6-10                     | 10.4  | nPod          | 10x v3            |
| HPAP-088 | RRID:SAMN19842617 | Male   | 32.81 | 37          | Caucasian        | T2D             | <0.833                   | 10.3  | nPod          | 10x v3            |
| HPAP-090 | RRID:SAMN19842619 | Female | 32.23 | 59          | Caucasian        | T2D             | >3                       | 8.7   | nPod          | 10x v3            |
| HPAP-091 | RRID:SAMN19842620 | Female | 35.58 | 50          | Hispanic         | T2D             | 0.25                     | NA    | nPod          | 10x v3            |
| HPAP-092 | RRID:SAMN19842621 | Male   | 25.59 | 21          | Hispanic         | AAB             |                          | 5.6   | nPod          | 10x v3            |
| HPAP-093 | RRID:SAMN19842622 | Male   | 34.98 | 50          | Caucasian        | ND              |                          | 4.9   | UPenn         | 10x v3            |
| HPAP-099 | RRID:SAMN22562810 | Female | 24.7  | 28          | Hispanic         | ND              |                          | 5     | UPenn         | 10x v3            |
| HPAP-100 | RRID:SAMN22562811 | Male   | 28.83 | 41          | Caucasian        | T2D             | 7-8                      | 10.7  | nPod          | 10x v3            |
| HPAP-101 | RRID:SAMN22562812 | Female | 38.01 | 55          | Hispanic         | ND              |                          | 5     | nPod          | 10x v3            |
| HPAP-103 | RRID:SAMN22562814 | Female | 36.44 | 48          | Caucasian        | ND              |                          | 6     | UPenn         | 10x v3            |
| HPAP-104 | RRID:SAMN22562815 | Male   | 20.63 | 4           | Hispanic         | ND              |                          | 4.9   | UPenn         | 10x v3            |
| HPAP-105 | RRID:SAMN25600001 | Female | 28.1  | 51          | Hispanic         | ND              |                          | 5.2   | nPod          | 10x v3            |
| HPAP-106 | RRID:SAMN25600002 | Male   | 28.12 | 55          | Caucasian        | T2D             | 3                        | 5.8   | UPenn         | 10x v3            |
| HPAP-107 | RRID:SAMN25600003 | Male   | 23.59 | 15          | Caucasian        | AAB             |                          | 5.3   | nPod          | 10x v3            |
| HPAP-108 | RRID:SAMN25600004 | Male   | 33    | 42          | African American | T2D             |                          | 10.8  | nPod          | 10x v3            |
| HPAP-109 | RRID:SAMN25600005 | Female | 29.49 | 59          | Hispanic         | T2D             | <5                       | 7.5   | nPod          | 10x v3            |

Supplemental Table 2: Distribution of Clinical &amp; Experimental Variables across Cell Type

| Variable               | Acinar | Active Stellate | Alpha | Alpha+Beta | Beta  | Cycling Alpha | Delta | Ductal | Endothelial | Gamma+Epsilon | Macrophage | Mast | MUC5B+ Ductal | Quiescent Stellate | Total  |
|------------------------|--------|-----------------|-------|------------|-------|---------------|-------|--------|-------------|---------------|------------|------|---------------|--------------------|--------|
| <b>Sex</b>             |        |                 |       |            |       |               |       |        |             |               |            |      |               |                    |        |
| F                      | 14442  | 3087            | 23770 | 1841       | 16685 | 205           | 1706  | 5268   | 2929        | 605           | 636        | 409  | 460           | 1529               | 73572  |
| M                      | 34919  | 4977            | 26441 | 2734       | 20489 | 496           | 1942  | 16779  | 3965        | 1028          | 1246       | 592  | 1046          | 1977               | 118631 |
| <b>Tissue Source</b>   |        |                 |       |            |       |               |       |        |             |               |            |      |               |                    |        |
| nPod                   | 40117  | 5991            | 28588 | 2540       | 25480 | 473           | 2285  | 18608  | 5476        | 972           | 1434       | 636  | 1174          | 2717               | 136491 |
| UPenn                  | 9244   | 2073            | 21623 | 2035       | 11694 | 228           | 1363  | 3439   | 1418        | 661           | 448        | 365  | 332           | 789                | 55712  |
| <b>Diabetes Status</b> |        |                 |       |            |       |               |       |        |             |               |            |      |               |                    |        |
| AAB+                   | 5844   | 1449            | 7371  | 889        | 10143 | 200           | 563   | 3036   | 943         | 280           | 224        | 127  | 208           | 664                | 31941  |
| ND                     | 14419  | 2695            | 21197 | 1819       | 17671 | 279           | 1993  | 5461   | 2695        | 815           | 590        | 361  | 526           | 1350               | 71871  |
| T1D                    | 17658  | 1656            | 8635  | 613        | 2016  | 38            | 319   | 7850   | 1439        | 209           | 546        | 166  | 307           | 548                | 42000  |
| T2D                    | 11440  | 2264            | 13008 | 1254       | 7344  | 184           | 773   | 5700   | 1817        | 329           | 522        | 347  | 465           | 944                | 46391  |
| <b>Donor</b>           |        |                 |       |            |       |               |       |        |             |               |            |      |               |                    |        |
| HPAP-019               | 1      | 302             | 304   | 176        | 2874  | 1             | 104   | 26     | 17          | 4             | 61         | 4    | 1             | 27                 | 3902   |
| HPAP-020               | 4850   | 409             | 686   | 64         | 113   | 8             | 36    | 2280   | 239         | 24            | 170        | 42   | 125           | 72                 | 9118   |
| HPAP-021               | 1984   | 228             | 429   | 36         | 59    | 5             | 5     | 2050   | 76          | 7             | 19         | 17   | 51            | 61                 | 5027   |
| HPAP-022               | 53     | 257             | 1696  | 331        | 590   | 3             | 133   | 68     | 127         | 48            | 29         | 44   | 7             | 77                 | 3463   |
| HPAP-023               | 188    | 37              | 42    | 16         | 15    | 1             | 3     | 269    | 42          | 7             | 3          | 4    | 15            | 8                  | 650    |
| HPAP-024               | 1081   | 48              | 57    | 11         | 82    | 0             | 10    | 278    | 17          | 4             | 7          | 6    | 14            | 7                  | 1622   |
| HPAP-026               | 152    | 4               | 87    | 7          | 92    | 0             | 12    | 35     | 8           | 11            | 2          | 0    | 0             | 4                  | 414    |
| HPAP-028               | 1649   | 211             | 591   | 64         | 682   | 2             | 58    | 518    | 142         | 22            | 56         | 4    | 13            | 74                 | 4086   |
| HPAP-029               | 430    | 89              | 510   | 51         | 693   | 2             | 55    | 282    | 27          | 35            | 7          | 7    | 3             | 36                 | 2227   |
| HPAP-032               | 1170   | 171             | 28    | 14         | 1     | 1             | 2     | 486    | 137         | 0             | 146        | 22   | 10            | 40                 | 2228   |
| HPAP-034               | 171    | 11              | 51    | 9          | 29    | 1             | 4     | 60     | 3           | 2             | 3          | 0    | 14            | 2                  | 360    |
| HPAP-035               | 354    | 49              | 664   | 48         | 417   | 0             | 35    | 170    | 66          | 15            | 17         | 2    | 4             | 29                 | 1870   |
| HPAP-036               | 595    | 21              | 524   | 34         | 311   | 0             | 34    | 122    | 25          | 28            | 17         | 4    | 4             | 8                  | 1727   |
| HPAP-037               | 1953   | 79              | 423   | 21         | 385   | 1             | 20    | 257    | 35          | 2             | 19         | 7    | 47            | 23                 | 3272   |
| HPAP-038               | 88     | 15              | 775   | 72         | 1084  | 15            | 87    | 59     | 5           | 46            | 3          | 10   | 3             | 5                  | 2267   |
| HPAP-039               | 2119   | 167             | 66    | 4          | 98    | 5             | 0     | 1164   | 43          | 5             | 102        | 4    | 87            | 49                 | 3913   |
| HPAP-040               | 467    | 23              | 1005  | 31         | 241   | 0             | 23    | 74     | 32          | 12            | 4          | 12   | 3             | 7                  | 1934   |
| HPAP-042               | 1544   | 151             | 63    | 46         | 106   | 1             | 12    | 485    | 149         | 3             | 10         | 35   | 5             | 62                 | 2672   |
| HPAP-043               | 768    | 40              | 100   | 17         | 312   | 2             | 17    | 136    | 49          | 28            | 11         | 5    | 6             | 19                 | 1510   |
| HPAP-044               | 1710   | 101             | 72    | 3          | 118   | 4             | 10    | 659    | 20          | 8             | 36         | 4    | 56            | 12                 | 2813   |
| HPAP-045               | 107    | 28              | 1337  | 80         | 374   | 0             | 33    | 61     | 9           | 18            | 4          | 7    | 1             | 2                  | 2061   |
| HPAP-047               | 1359   | 115             | 61    | 8          | 101   | 5             | 5     | 452    | 106         | 7             | 13         | 3    | 17            | 27                 | 2279   |
| HPAP-049               | 53     | 52              | 1307  | 64         | 894   | 31            | 46    | 28     | 134         | 17            | 6          | 15   | 0             | 121                | 2768   |
| HPAP-050               | 470    | 41              | 952   | 44         | 307   | 1             | 10    | 55     | 72          | 7             | 9          | 3    | 4             | 43                 | 2018   |
| HPAP-051               | 55     | 51              | 596   | 26         | 116   | 2             | 25    | 23     | 33          | 19            | 16         | 18   | 0             | 12                 | 992    |
| HPAP-052               | 126    | 94              | 624   | 47         | 210   | 7             | 33    | 40     | 29          | 23            | 14         | 10   | 14            | 14                 | 1285   |
| HPAP-053               | 90     | 82              | 725   | 29         | 349   | 0             | 20    | 18     | 58          | 18            | 17         | 11   | 2             | 23                 | 1442   |
| HPAP-054               | 373    | 63              | 1047  | 56         | 380   | 0             | 48    | 162    | 15          | 13            | 12         | 12   | 5             | 13                 | 2199   |
| HPAP-055               | 222    | 12              | 1317  | 93         | 104   | 4             | 28    | 56     | 20          | 18            | 9          | 16   | 0             | 3                  | 1902   |
| HPAP-056               | 160    | 18              | 667   | 42         | 239   | 56            | 26    | 37     | 13          | 14            | 20         | 15   | 2             | 1                  | 1310   |
| HPAP-057               | 26     | 22              | 481   | 30         | 205   | 0             | 13    | 11     | 24          | 12            | 7          | 7    | 0             | 6                  | 844    |
| HPAP-058               | 159    | 80              | 521   | 30         | 289   | 0             | 45    | 46     | 58          | 7             | 16         | 24   | 16            | 35                 | 1326   |
| HPAP-059               | 485    | 91              | 199   | 10         | 143   | 4             | 27    | 261    | 23          | 12            | 18         | 15   | 12            | 14                 | 1314   |
| HPAP-061               | 136    | 58              | 886   | 44         | 281   | 0             | 25    | 82     | 18          | 9             | 7          | 7    | 2             | 19                 | 1574   |
| HPAP-063               | 51     | 129             | 1006  | 52         | 387   | 4             | 8     | 43     | 36          | 5             | 31         | 30   | 10            | 28                 | 1820   |
| HPAP-064               | 300    | 25              | 1164  | 84         | 143   | 1             | 26    | 128    | 5           | 8             | 11         | 9    | 5             | 13                 | 1922   |
| HPAP-065               | 696    | 29              | 11    | 9          | 69    | 0             | 1     | 398    | 10          | 3             | 7          | 9    | 63            | 8                  | 1313   |
| HPAP-070               | 148    | 32              | 235   | 26         | 119   | 2             | 24    | 293    | 8           | 5             | 5          | 5    | 15            | 2                  | 919    |
| HPAP-071               | 692    | 86              | 722   | 27         | 55    | 0             | 9     | 509    | 77          | 10            | 13         | 12   | 8             | 20                 | 2240   |

|          |      |     |      |     |      |     |     |      |     |     |     |    |     |     |       |
|----------|------|-----|------|-----|------|-----|-----|------|-----|-----|-----|----|-----|-----|-------|
| HPAP-072 | 131  | 37  | 490  | 24  | 243  | 16  | 27  | 54   | 36  | 6   | 19  | 6  | 7   | 29  | 1125  |
| HPAP-074 | 7    | 48  | 505  | 54  | 305  | 0   | 30  | 7    | 9   | 7   | 7   | 3  | 2   | 7   | 991   |
| HPAP-075 | 98   | 22  | 813  | 46  | 221  | 0   | 43  | 13   | 39  | 16  | 23  | 27 | 0   | 11  | 1372  |
| HPAP-077 | 122  | 49  | 1108 | 134 | 296  | 105 | 50  | 51   | 26  | 15  | 22  | 18 | 11  | 35  | 2042  |
| HPAP-079 | 111  | 62  | 272  | 28  | 80   | 8   | 11  | 10   | 39  | 9   | 15  | 13 | 2   | 8   | 668   |
| HPAP-080 | 106  | 66  | 1165 | 80  | 742  | 42  | 47  | 35   | 113 | 36  | 22  | 13 | 8   | 27  | 2502  |
| HPAP-081 | 117  | 159 | 950  | 35  | 440  | 1   | 27  | 103  | 50  | 9   | 12  | 12 | 3   | 29  | 1947  |
| HPAP-082 | 788  | 94  | 67   | 21  | 198  | 2   | 12  | 289  | 40  | 0   | 43  | 8  | 44  | 35  | 1641  |
| HPAP-083 | 499  | 38  | 438  | 30  | 105  | 3   | 28  | 183  | 13  | 7   | 13  | 12 | 21  | 2   | 1392  |
| HPAP-084 | 484  | 62  | 475  | 77  | 453  | 4   | 107 | 283  | 49  | 67  | 12  | 15 | 49  | 33  | 2170  |
| HPAP-085 | 236  | 179 | 326  | 68  | 714  | 0   | 38  | 128  | 113 | 9   | 11  | 11 | 19  | 66  | 1918  |
| HPAP-087 | 6119 | 415 | 3181 | 138 | 391  | 12  | 45  | 1271 | 652 | 46  | 107 | 25 | 31  | 224 | 12657 |
| HPAP-088 | 749  | 124 | 280  | 52  | 212  | 2   | 19  | 332  | 48  | 13  | 46  | 14 | 40  | 34  | 1965  |
| HPAP-090 | 157  | 161 | 3263 | 212 | 1149 | 146 | 141 | 146  | 180 | 78  | 67  | 63 | 21  | 74  | 5858  |
| HPAP-091 | 46   | 103 | 279  | 37  | 350  | 1   | 22  | 49   | 72  | 10  | 11  | 8  | 1   | 50  | 1039  |
| HPAP-092 | 1477 | 262 | 12   | 38  | 14   | 13  | 2   | 1669 | 182 | 4   | 48  | 11 | 86  | 63  | 3881  |
| HPAP-099 | 375  | 84  | 1614 | 74  | 705  | 2   | 45  | 62   | 31  | 29  | 10  | 10 | 4   | 19  | 3064  |
| HPAP-100 | 1163 | 225 | 1673 | 92  | 1590 | 2   | 108 | 1322 | 190 | 25  | 49  | 45 | 126 | 89  | 6699  |
| HPAP-101 | 318  | 531 | 2115 | 195 | 3944 | 0   | 455 | 132  | 917 | 164 | 31  | 27 | 47  | 501 | 9377  |
| HPAP-103 | 644  | 83  | 993  | 70  | 1353 | 7   | 90  | 274  | 26  | 10  | 25  | 5  | 18  | 43  | 3641  |
| HPAP-104 | 41   | 79  | 1380 | 161 | 2738 | 10  | 441 | 447  | 209 | 276 | 13  | 9  | 101 | 78  | 5983  |
| HPAP-105 | 158  | 184 | 2457 | 206 | 2973 | 20  | 330 | 44   | 497 | 36  | 30  | 33 | 2   | 201 | 7171  |
| HPAP-106 | 841  | 312 | 1834 | 437 | 937  | 13  | 99  | 332  | 309 | 55  | 77  | 52 | 12  | 217 | 5527  |
| HPAP-107 | 1238 | 535 | 1527 | 312 | 3266 | 119 | 172 | 388  | 395 | 111 | 49  | 53 | 83  | 312 | 8560  |
| HPAP-108 | 1925 | 315 | 299  | 20  | 206  | 4   | 54  | 700  | 230 | 14  | 68  | 5  | 24  | 112 | 3976  |
| HPAP-109 | 4376 | 314 | 664  | 78  | 482  | 0   | 93  | 1542 | 422 | 45  | 95  | 42 | 100 | 181 | 8434  |

**Supplemental Table 3: Established marker genes for pancreatic islet cell types**

| <b>Gene Symbol</b> | <b>Ensembl ID</b> | <b>Gene Name</b>                             | <b>Cell Type</b>                         |
|--------------------|-------------------|----------------------------------------------|------------------------------------------|
| <i>INS</i>         | ENSG00000254647   | Insulin                                      | Beta Cells                               |
| <i>IAPP</i>        | ENSG00000121351   | Islet Amyloid Polypeptide                    | Beta Cells                               |
| <i>GCG</i>         | ENSG00000115263   | Glucagon                                     | Alpha Cells                              |
| <i>MKI67</i>       | ENSG00000148773   | Marker of Proliferation Ki 67                | Proliferating Cells; Cycling Alpha Cells |
| <i>CDK1</i>        | ENSG00000170312   | Cell Dependent Kinase 1                      | Proliferating Cells; Cycling Alpha Cells |
| <i>SST</i>         | ENSG00000157005   | Somatostatin                                 | Delta Cells                              |
| <i>PPY</i>         | ENSG00000108849   | Pancreatic Polypeptide                       | Gamma Cells                              |
| <i>GHRL</i>        | ENSG00000157017   | Ghrelin and Obestatin Prepropeptide          | Epsilon Cells                            |
| <i>CFTR</i>        | ENSG00000001626   | CF Transmembrane Conductance Regulator       | Ductal Cells                             |
| <i>MUC5B</i>       | ENSG00000117983   | Mucin 5B, Oligomeric Mucus/Gel-Forming       | MUC5B+ Ductal Cells                      |
| <i>REG1A</i>       | ENSG00000115386   | Regenerating Family Member 1 Alpha           | Acinar Cells                             |
| <i>CTRB2</i>       | ENSG00000168928   | Chymotrypsinogen B2                          | Acinar Cells                             |
| <i>PRSS1</i>       | ENSG00000204983   | Serine Protease 1                            | Acinar Cells                             |
| <i>PRSS2</i>       | ENSG00000275896   | Serine Protease 2                            | Acinar Cells                             |
| <i>PDGFRB</i>      | ENSG00000113721   | Platelet Derived Growth Factor Receptor Beta | Stellate Cells                           |
| <i>COL6A1</i>      | ENSG00000142156   | Collagen Type VI Alpha 1 Chain               | Stellate Cells                           |
| <i>RGSS5</i>       | ENSG00000143248   | Regulator Of G Protein Signaling 5           | Quiescent Stellate Cells                 |
| <i>PLVAP</i>       | ENSG00000130300   | Plasmalemma Vesicle Associated Protein       | Endothelial Cells                        |
| <i>ESAM</i>        | ENSG00000149564   | Endothelial Cell Adhesion Molecule           | Endothelial Cells                        |
| <i>VWF</i>         | ENSG00000110799   | Von Willebrand Factor                        | Endothelial Cells                        |
| <i>KIT</i>         | ENSG00000157404   | KIT Proto-Oncogene, Receptor Tyrosine Kinase | Mast Cells                               |
| <i>CD69</i>        | ENSG00000110848   | Cluster of Differentiation 69                | Mast Cells                               |
| <i>C1QA</i>        | ENSG00000173372   | Complement C1q A Chain                       | Macrophages                              |
| <i>C1QB</i>        | ENSG00000173369   | Complement C1q B Chain                       | Macrophages                              |
| <i>C1QC</i>        | ENSG00000159189   | Complement C1q C Chain                       | Macrophages                              |

Supplemental Table 4: Cell type specific marker genes

| Cell Type | Gene              | baseMean   | log2FoldChange | lfcSE      | stat       | pvalue   | padj     |
|-----------|-------------------|------------|----------------|------------|------------|----------|----------|
| Acinar    | <i>PNLIP</i>      | 83448.6275 | 9.260781718    | 0.58753037 | 15.762218  | 5.66E-56 | 3.81E-52 |
| Acinar    | <i>CPA1</i>       | 214092.303 | 9.254370332    | 0.69557887 | 13.3045592 | 2.18E-40 | 4.88E-37 |
| Acinar    | <i>CPB1</i>       | 105135.884 | 9.146352589    | 0.68339642 | 13.3836706 | 7.53E-41 | 3.05E-37 |
| Acinar    | <i>PRSS2</i>      | 728617.004 | 9.104837908    | 0.69123586 | 13.1718251 | 1.27E-39 | 1.72E-36 |
| Acinar    | <i>KLK1</i>       | 12530.2185 | 9.001868088    | 0.68025149 | 13.2331472 | 5.65E-40 | 8.69E-37 |
| Acinar    | <i>CUZD1</i>      | 15980.622  | 8.955248997    | 0.67489106 | 13.2691772 | 3.49E-40 | 6.72E-37 |
| Acinar    | <i>AMY2A</i>      | 21496.4411 | 9.506832452    | 0.74426104 | 12.7735189 | 2.30E-37 | 1.35E-34 |
| Acinar    | <i>CTRB2</i>      | 253574.07  | 8.908526187    | 0.6733092  | 13.2309586 | 5.81E-40 | 8.69E-37 |
| Acinar    | <i>CTRL</i>       | 6552.94275 | 8.754278355    | 0.65477972 | 13.3698067 | 9.08E-41 | 3.05E-37 |
| Acinar    | <i>CLPS</i>       | 328795.692 | 9.093606825    | 0.69976667 | 12.9951985 | 1.30E-38 | 1.46E-35 |
| Alpha     | <i>GCG</i>        | 386658.983 | 5.470787166    | 0.47807775 | 11.4433    | 2.54E-30 | 6.81E-27 |
| Alpha     | <i>CRH</i>        | 404.653545 | 4.86794705     | 0.50690894 | 9.60319817 | 7.75E-22 | 3.78E-19 |
| Alpha     | <i>SPOCK3</i>     | 121.047617 | 5.230035815    | 0.58100118 | 9.00176459 | 2.22E-19 | 6.16E-17 |
| Alpha     | <i>F10</i>        | 1342.17657 | 4.345088186    | 0.4461367  | 9.73936504 | 2.05E-22 | 1.14E-19 |
| Alpha     | <i>IRX2</i>       | 712.212188 | 4.224972801    | 0.42976608 | 9.83086621 | 8.29E-23 | 4.94E-20 |
| Alpha     | <i>POPDC3</i>     | 260.379467 | 4.502968137    | 0.47854074 | 9.40979059 | 4.97E-21 | 2.00E-18 |
| Alpha     | <i>C5orf38</i>    | 542.210177 | 4.34360024     | 0.45368735 | 9.57399462 | 1.03E-21 | 4.87E-19 |
| Alpha     | <i>GC</i>         | 3264.52404 | 4.144842651    | 0.42293614 | 9.80016195 | 1.12E-22 | 6.46E-20 |
| Alpha     | <i>SPINK4</i>     | 128.891941 | 4.593136996    | 0.50962126 | 9.01284422 | 2.01E-19 | 5.67E-17 |
| Alpha     | <i>TMEM236</i>    | 130.788035 | 3.91798197     | 0.42285556 | 9.26553268 | 1.94E-20 | 7.10E-18 |
| Beta      | <i>MAFA</i>       | 560.69505  | 6.924292111    | 0.57275854 | 12.0893738 | 1.20E-33 | 1.21E-30 |
| Beta      | <i>IAPP</i>       | 19026.8416 | 7.291942973    | 0.68982824 | 10.5706646 | 4.08E-26 | 2.53E-23 |
| Beta      | <i>ADCYAP1</i>    | 903.618905 | 6.241298497    | 0.55674966 | 11.2102422 | 3.63E-29 | 2.93E-26 |
| Beta      | <i>INS</i>        | 4058199.59 | 6.522721404    | 0.61919029 | 10.5342759 | 6.00E-26 | 3.59E-23 |
| Beta      | <i>AC132217.2</i> | 222.972216 | 7.038850873    | 0.69615069 | 10.1111023 | 4.93E-24 | 1.99E-21 |
| Beta      | <i>LRRTM3</i>     | 71.8334176 | 6.740659795    | 0.6547739  | 10.2946373 | 7.45E-25 | 3.75E-22 |
| Beta      | <i>HHATL</i>      | 67.1907745 | 7.102209311    | 0.73092392 | 9.71675588 | 2.56E-22 | 8.59E-20 |
| Beta      | <i>SAMD11</i>     | 366.59322  | 5.598819344    | 0.51565942 | 10.8575915 | 1.84E-27 | 1.23E-24 |
| Beta      | <i>C1orf127</i>   | 186.091014 | 5.801118478    | 0.55747105 | 10.4061341 | 2.32E-25 | 1.21E-22 |
| Beta      | <i>WSCD2</i>      | 79.7730513 | 6.876120377    | 0.74019288 | 9.28963321 | 1.55E-20 | 3.42E-18 |
| Delta     | <i>SST</i>        | 369394.643 | 5.935216175    | 0.5023096  | 11.8158526 | 3.23E-32 | 5.06E-29 |
| Delta     | <i>GPC5-AS11</i>  | 57.9052436 | 5.508842875    | 0.5853384  | 9.41138134 | 4.90E-21 | 5.75E-18 |
| Delta     | <i>LRFN5</i>      | 38.9955398 | 4.702775598    | 0.51064485 | 9.20948398 | 3.28E-20 | 3.08E-17 |
| Delta     | <i>LY6H1</i>      | 310.267655 | 4.483761841    | 0.48260921 | 9.29066778 | 1.53E-20 | 1.60E-17 |
| Delta     | <i>BCHE</i>       | 63.324118  | 4.636359837    | 0.51030809 | 9.08541316 | 1.03E-19 | 8.82E-17 |
| Delta     | <i>CALB11</i>     | 30.5385557 | 4.757997852    | 0.53928025 | 8.82286682 | 1.12E-18 | 8.06E-16 |
| Delta     | <i>LINC01571</i>  | 79.1785517 | 5.392851799    | 0.65300069 | 8.25856983 | 1.47E-16 | 6.92E-14 |
| Delta     | <i>CBLN4</i>      | 49.9660007 | 4.498454459    | 0.51158491 | 8.79317268 | 1.45E-18 | 9.76E-16 |
| Delta     | <i>CRYGD</i>      | 7.63928039 | 4.406145446    | 0.513453   | 8.58139976 | 9.37E-18 | 5.18E-15 |
| Delta     | <i>F5</i>         | 57.6997129 | 4.449120772    | 0.52864185 | 8.41613425 | 3.89E-17 | 1.99E-14 |
| Ductal    | <i>FGFBP1</i>     | 486.14324  | 10.0487938     | 0.83873219 | 11.9809326 | 4.47E-33 | 8.30E-30 |
| Ductal    | <i>CFTR</i>       | 580.529802 | 8.824184463    | 0.71391663 | 12.360245  | 4.29E-35 | 1.39E-31 |
| Ductal    | <i>MMP7</i>       | 5360.30536 | 8.603083396    | 0.6988719  | 12.3099576 | 8.01E-35 | 2.08E-31 |
| Ductal    | <i>KRT23</i>      | 248.433366 | 9.055082404    | 0.79192414 | 11.4342801 | 2.82E-30 | 2.29E-27 |
| Ductal    | <i>S100A14</i>    | 551.937493 | 7.793304309    | 0.66957457 | 11.6391881 | 2.60E-31 | 2.82E-28 |
| Ductal    | <i>KRT19</i>      | 3436.94264 | 6.469389921    | 0.50716982 | 12.7558652 | 2.89E-37 | 1.25E-33 |
| Ductal    | <i>LGALS4</i>     | 1162.43095 | 7.071974776    | 0.59562612 | 11.8731776 | 1.63E-32 | 2.35E-29 |
| Ductal    | <i>CEACAM7</i>    | 41.885775  | 10.026333      | 1.02009006 | 9.82887045 | 8.46E-23 | 1.64E-20 |
| Ductal    | <i>VTCN1</i>      | 173.149158 | 7.812773113    | 0.70318437 | 11.1105614 | 1.11E-28 | 6.89E-26 |

|               |                 |            |             |            |            |          |          |
|---------------|-----------------|------------|-------------|------------|------------|----------|----------|
| Ductal        | <i>TRPV6</i>    | 170.811242 | 7.803004022 | 0.70272527 | 11.1039184 | 1.20E-28 | 7.09E-26 |
| Endothelial   | <i>PLVAP</i>    | 1412.10646 | 10.27851975 | 0.69029363 | 14.8900689 | 3.82E-50 | 1.02E-46 |
| Endothelial   | <i>KDR</i>      | 316.469988 | 10.44960212 | 0.71267694 | 14.6624669 | 1.12E-48 | 1.28E-45 |
| Endothelial   | <i>ESM1</i>     | 225.344453 | 9.924277757 | 0.66985806 | 14.8154935 | 1.16E-49 | 2.14E-46 |
| Endothelial   | <i>VWF</i>      | 294.190606 | 10.00333162 | 0.69007085 | 14.4960936 | 1.28E-47 | 1.14E-44 |
| Endothelial   | <i>PCAT19</i>   | 595.040826 | 9.345526123 | 0.62598948 | 14.9292062 | 2.13E-50 | 8.49E-47 |
| Endothelial   | <i>PECAM1</i>   | 1221.20766 | 9.31345404  | 0.62111726 | 14.9946792 | 7.95E-51 | 6.35E-47 |
| Endothelial   | <i>CLDN5</i>    | 919.740252 | 9.585381212 | 0.65420692 | 14.6519103 | 1.31E-48 | 1.31E-45 |
| Endothelial   | <i>CLEC14A</i>  | 386.780443 | 9.257831731 | 0.62528248 | 14.805839  | 1.34E-49 | 2.14E-46 |
| Endothelial   | <i>ADGRL4</i>   | 262.506573 | 10.1063134  | 0.72944781 | 13.854745  | 1.19E-43 | 6.79E-41 |
| Endothelial   | <i>FCN3</i>     | 325.539303 | 10.3853239  | 0.76378285 | 13.5972205 | 4.16E-42 | 1.66E-39 |
| Gamma+Epsilon | <i>PPY</i>      | 94369.0121 | 7.078650103 | 0.60111369 | 11.7758923 | 5.20E-32 | 4.10E-28 |
| Gamma+Epsilon | <i>CARTPT</i>   | 173.691977 | 5.398082081 | 0.87538255 | 6.16654067 | 6.98E-10 | 6.12E-07 |
| Gamma+Epsilon | <i>NPW</i>      | 116.366666 | 3.002341903 | 0.40878939 | 7.34447119 | 2.07E-13 | 4.08E-10 |
| Gamma+Epsilon | <i>GPC5-AS1</i> | 27.7223802 | 3.822901526 | 0.58087802 | 6.58124661 | 4.67E-11 | 5.26E-08 |
| Gamma+Epsilon | <i>CALB1</i>    | 15.822587  | 3.457935068 | 0.57030112 | 6.06334956 | 1.33E-09 | 1.05E-06 |
| Gamma+Epsilon | <i>SERTM1</i>   | 25.9690993 | 3.321249453 | 0.55796721 | 5.9524097  | 2.64E-09 | 1.60E-06 |
| Gamma+Epsilon | <i>LY6H</i>     | 162.099124 | 2.906751246 | 0.46587085 | 6.23939285 | 4.39E-10 | 4.33E-07 |
| Gamma+Epsilon | <i>GHRL</i>     | 27647.2093 | 4.201641447 | 0.80443595 | 5.22309012 | 1.76E-07 | 5.14E-05 |
| Gamma+Epsilon | <i>ERICH3</i>   | 11.7212686 | 2.977688958 | 0.49276426 | 6.04282658 | 1.51E-09 | 1.09E-06 |
| Gamma+Epsilon | <i>PRG4</i>     | 36.8547703 | 2.401999592 | 0.39995703 | 6.00564416 | 1.91E-09 | 1.25E-06 |
| Macrophage    | <i>C1QA</i>     | 891.963179 | 13.42107535 | 0.83690029 | 16.0366479 | 7.09E-58 | 1.84E-54 |
| Macrophage    | <i>C1QB</i>     | 794.340725 | 13.70121086 | 0.87126808 | 15.7255973 | 1.01E-55 | 9.64E-53 |
| Macrophage    | <i>C1QC</i>     | 533.772833 | 13.49328201 | 0.87844253 | 15.3604607 | 3.01E-53 | 2.40E-50 |
| Macrophage    | <i>TYROBP</i>   | 979.032209 | 12.21521238 | 0.76315925 | 16.006112  | 1.16E-57 | 1.84E-54 |
| Macrophage    | <i>SDS</i>      | 339.136572 | 11.40694202 | 0.72102342 | 15.8204875 | 2.25E-56 | 2.68E-53 |
| Macrophage    | <i>LAPTM5</i>   | 1009.25276 | 10.93715547 | 0.68234306 | 16.0288221 | 8.04E-58 | 1.84E-54 |
| Macrophage    | <i>MS4A7</i>    | 281.02144  | 12.0069871  | 0.82842279 | 14.4937913 | 1.33E-47 | 7.03E-45 |
| Macrophage    | <i>RGS1</i>     | 469.302013 | 10.108359   | 0.67013087 | 15.0841566 | 2.06E-51 | 1.40E-48 |
| Macrophage    | <i>ITGB2</i>    | 113.357283 | 11.13585483 | 0.78707161 | 14.1484647 | 1.91E-45 | 7.59E-43 |
| Macrophage    | <i>GPR183</i>   | 366.114854 | 9.694248375 | 0.65925502 | 14.7048533 | 6.00E-49 | 3.58E-46 |
| Mast          | <i>TPSB2</i>    | 1166.62273 | 11.91876425 | 0.89762721 | 13.2780781 | 3.10E-40 | 2.52E-37 |
| Mast          | <i>TPSAB1</i>   | 842.842628 | 12.1443508  | 0.97604224 | 12.4424438 | 1.54E-35 | 6.24E-33 |
| Mast          | <i>CD69</i>     | 44.4709563 | 10.63545744 | 1.01463518 | 10.4820508 | 1.04E-25 | 9.42E-24 |
| Mast          | <i>SAMSN1</i>   | 69.3486339 | 7.785070866 | 0.6816396  | 11.4210954 | 3.28E-30 | 6.66E-28 |
| Mast          | <i>CD37</i>     | 70.7527425 | 7.135633786 | 0.65755769 | 10.8517228 | 1.96E-27 | 2.27E-25 |
| Mast          | <i>CD48</i>     | 28.9260837 | 8.222423089 | 0.81464112 | 10.0933072 | 5.91E-24 | 4.37E-22 |
| Mast          | <i>KIT</i>      | 65.3883664 | 6.263939055 | 0.6275144  | 9.98214392 | 1.82E-23 | 1.23E-21 |
| Mast          | <i>GCSAML</i>   | 28.4336744 | 12.03947422 | 1.68701913 | 7.13653688 | 9.57E-13 | 2.99E-11 |
| Mast          | <i>SRGN</i>     | 162.375124 | 4.761672672 | 0.46771938 | 10.1806188 | 2.42E-24 | 1.97E-22 |
| Mast          | <i>ITGAX</i>    | 35.8426022 | 5.889919886 | 0.65251565 | 9.02648065 | 1.77E-19 | 1.03E-17 |
| Stellate      | <i>COL3A1</i>   | 1987.99305 | 10.28071325 | 0.65526673 | 15.6893564 | 1.79E-55 | 2.06E-51 |
| Stellate      | <i>DCN</i>      | 2201.83843 | 11.05083139 | 0.73592161 | 15.016316  | 5.74E-51 | 1.30E-47 |
| Stellate      | <i>LUM</i>      | 2063.37258 | 10.69941056 | 0.70527391 | 15.1705748 | 5.54E-52 | 2.12E-48 |
| Stellate      | <i>SFRP2</i>    | 2352.30153 | 10.37137585 | 0.67316678 | 15.4068445 | 1.47E-53 | 8.47E-50 |
| Stellate      | <i>PTGDS</i>    | 1561.05924 | 10.14394675 | 0.67491958 | 15.0298599 | 4.68E-51 | 1.30E-47 |
| Stellate      | <i>PRRX1</i>    | 464.056448 | 10.18543803 | 0.68715754 | 14.8225662 | 1.05E-49 | 1.34E-46 |
| Stellate      | <i>COL1A2</i>   | 2147.98482 | 10.72449353 | 0.74593136 | 14.3773196 | 7.18E-47 | 5.90E-44 |
| Stellate      | <i>BGN</i>      | 1410.98941 | 9.880364089 | 0.65845228 | 15.0054368 | 6.76E-51 | 1.30E-47 |
| Stellate      | <i>C7</i>       | 2329.61936 | 9.726195841 | 0.65232837 | 14.9099691 | 2.84E-50 | 4.66E-47 |
| Stellate      | <i>COL6A3</i>   | 1345.39533 | 9.414870783 | 0.64225592 | 14.6590643 | 1.18E-48 | 1.36E-45 |

**Supplemental Table 5: Cell sub-type specific marker genes**

| Cell Type          | Gene            | baseMean   | log2FoldChange | lfcSE      | stat       | pvalue   | padj     |
|--------------------|-----------------|------------|----------------|------------|------------|----------|----------|
| Cycling Alpha      | <i>UBE2C</i>    | 80.5214034 | 9.206274987    | 0.98168109 | 9.378071   | 6.72E-21 | 4.03E-17 |
| Cycling Alpha      | <i>CENPF</i>    | 140.187069 | 10.52466346    | 1.24115751 | 8.47971622 | 2.26E-17 | 3.39E-14 |
| Cycling Alpha      | <i>BIRC5</i>    | 108.234109 | 8.647895595    | 0.96687801 | 8.94414342 | 3.75E-19 | 1.12E-15 |
| Cycling Alpha      | <i>TOP2A</i>    | 89.175053  | 10.69682507    | 1.44547391 | 7.40022008 | 1.36E-13 | 3.55E-11 |
| Cycling Alpha      | <i>FOXM1</i>    | 40.5227356 | 7.142247943    | 0.86293037 | 8.27673725 | 1.27E-16 | 9.49E-14 |
| Cycling Alpha      | <i>NUSAP1</i>   | 89.0001022 | 6.675206853    | 0.77617484 | 8.60013303 | 7.96E-18 | 1.59E-14 |
| Cycling Alpha      | <i>TPX2</i>     | 60.6013388 | 7.229807053    | 0.8887387  | 8.13490741 | 4.12E-16 | 2.47E-13 |
| Cycling Alpha      | <i>CKAP2L</i>   | 27.2601722 | 9.501153746    | 1.36078738 | 6.98210012 | 2.91E-12 | 4.85E-10 |
| Cycling Alpha      | <i>MKI67</i>    | 72.0495904 | 14.87498556    | 2.70251763 | 5.50412157 | 3.71E-08 | 1.67E-06 |
| Cycling Alpha      | <i>CKS2</i>     | 90.9793531 | 6.539084858    | 0.78722394 | 8.30651165 | 9.86E-17 | 8.45E-14 |
| Active Stellate    | <i>APOD</i>     | 135.025509 | 10.24312855    | 1.01243874 | 10.1172823 | 4.63E-24 | 2.30E-20 |
| Active Stellate    | <i>SFRP2</i>    | 215.955245 | 8.451774524    | 0.81439001 | 10.378043  | 3.12E-25 | 3.10E-21 |
| Active Stellate    | <i>PTGDS</i>    | 127.942569 | 7.92791041     | 0.88817645 | 8.92605335 | 4.41E-19 | 8.78E-16 |
| Active Stellate    | <i>CFD</i>      | 72.2514895 | 7.869506605    | 0.88058414 | 8.936689   | 4.01E-19 | 8.78E-16 |
| Active Stellate    | <i>CCL11</i>    | 22.2330186 | 8.031638725    | 0.95945692 | 8.37102587 | 5.71E-17 | 5.16E-14 |
| Active Stellate    | <i>DPT</i>      | 31.5630752 | 7.190299523    | 0.88835195 | 8.09397617 | 5.77E-16 | 4.10E-13 |
| Active Stellate    | <i>C7</i>       | 206.14786  | 5.72446354     | 0.64090276 | 8.93187528 | 4.19E-19 | 8.78E-16 |
| Active Stellate    | <i>PODN</i>     | 13.9253728 | 6.514290123    | 0.80594532 | 8.08279412 | 6.33E-16 | 4.20E-13 |
| Active Stellate    | <i>CHI3L1</i>   | 11.9342832 | 7.386020684    | 0.9885742  | 7.47138723 | 7.94E-14 | 3.16E-11 |
| Active Stellate    | <i>CYP1B1</i>   | 120.726368 | 5.346662865    | 0.63111193 | 8.47181392 | 2.42E-17 | 2.67E-14 |
| Quiescent Stellate | <i>FABP4</i>    | 87.8559814 | 5.528424384    | 0.64370836 | 8.5883992  | 8.82E-18 | 1.44E-14 |
| Quiescent Stellate | <i>RGS5</i>     | 313.879384 | 4.272919976    | 0.49837361 | 8.57372841 | 1.00E-17 | 1.44E-14 |
| Quiescent Stellate | <i>PDK4</i>     | 93.2227491 | 3.428096836    | 0.39697263 | 8.63560008 | 5.84E-18 | 1.44E-14 |
| Quiescent Stellate | <i>ADIRF</i>    | 270.932066 | 3.179618354    | 0.37773129 | 8.41767273 | 3.84E-17 | 4.41E-14 |
| Quiescent Stellate | <i>MCAM</i>     | 19.3425921 | 3.96964726     | 0.55417901 | 7.16311375 | 7.89E-13 | 3.02E-10 |
| Quiescent Stellate | <i>MUSTN1</i>   | 25.1960965 | 4.190289854    | 0.6201111  | 6.75732117 | 1.41E-11 | 4.25E-09 |
| Quiescent Stellate | <i>ESAM</i>     | 12.4639193 | 4.092628755    | 0.61368322 | 6.66895982 | 2.58E-11 | 6.72E-09 |
| Quiescent Stellate | <i>EFHD1</i>    | 20.0073839 | 2.707126933    | 0.34195993 | 7.91650325 | 2.44E-15 | 1.75E-12 |
| Quiescent Stellate | <i>ADAMTS9</i>  | 13.4207352 | 2.925769664    | 0.39976747 | 7.31867869 | 2.50E-13 | 1.31E-10 |
| Quiescent Stellate | <i>ADAMTS4</i>  | 58.2963609 | 2.977883765    | 0.41570765 | 7.16340869 | 7.87E-13 | 3.02E-10 |
| MUC5B+ Ductal      | <i>TFF2</i>     | 185.53619  | 12.57294599    | 1.38327929 | 9.08923173 | 9.97E-20 | 6.52E-16 |
| MUC5B+ Ductal      | <i>TFF1</i>     | 749.801481 | 8.224686918    | 0.92265343 | 8.91416717 | 4.91E-19 | 1.07E-15 |
| MUC5B+ Ductal      | <i>MGST1</i>    | 51.6775475 | 6.654339231    | 0.74631126 | 8.91630561 | 4.82E-19 | 1.07E-15 |
| MUC5B+ Ductal      | <i>TFF3</i>     | 80.4384588 | 6.621126593    | 0.8169785  | 8.1044074  | 5.30E-16 | 6.93E-13 |
| MUC5B+ Ductal      | <i>TCN1</i>     | 31.6066526 | 6.526062948    | 0.81174889 | 8.03950953 | 9.02E-16 | 9.82E-13 |
| MUC5B+ Ductal      | <i>FXYP3</i>    | 42.7691115 | 5.089289493    | 0.59847792 | 8.50372134 | 1.84E-17 | 3.00E-14 |
| MUC5B+ Ductal      | <i>SPINK1</i>   | 1140.09788 | 5.023434405    | 0.63735292 | 7.88171547 | 3.23E-15 | 3.01E-12 |
| MUC5B+ Ductal      | <i>MMP1</i>     | 125.91246  | 7.870986341    | 1.30142971 | 6.04795346 | 1.47E-09 | 5.64E-07 |
| MUC5B+ Ductal      | <i>C19orf33</i> | 167.668638 | 4.224360845    | 0.55206086 | 7.65198396 | 1.98E-14 | 1.62E-11 |
| MUC5B+ Ductal      | <i>LDHB</i>     | 23.8563933 | 4.829677165    | 0.67514283 | 7.15356358 | 8.46E-13 | 5.52E-10 |

Supplemental Table 6: Significant differentially expressed genes in T1D compared to ND controls

| Cell Type       | Gene        | baseMean    | log2FoldChange | lfcSE       | stat         | pvalue      | padj        |
|-----------------|-------------|-------------|----------------|-------------|--------------|-------------|-------------|
| Acinar          | CNPY2       | 347.8512976 | -0.56800117    | 0.133869446 | -4.242948554 | 2.21E-05    | 0.098297916 |
| Acinar          | RRP15       | 78.45479199 | 0.843427946    | 0.208163014 | 4.051766598  | 5.08E-05    | 0.098297916 |
| Acinar          | RELCH       | 27.80400081 | 0.977807427    | 0.241775756 | 4.044274102  | 5.25E-05    | 0.098297916 |
| Acinar          | CHORDC1     | 34.23935916 | 1.00947568     | 0.253500137 | 3.98215043   | 6.83E-05    | 0.098297916 |
| Acinar          | BLZF1       | 25.76782523 | 0.910919629    | 0.229985382 | 3.960771856  | 7.47E-05    | 0.098297916 |
| Acinar          | GPHA2       | 144.6360587 | -2.238017882   | 0.571959268 | -3.912897311 | 9.12E-05    | 0.098297916 |
| Acinar          | KRT17       | 48.62088897 | 3.228794404    | 0.825758118 | 3.910097076  | 9.23E-05    | 0.098297916 |
| Acinar          | SOC53       | 50.0894229  | 1.52534322     | 0.391213757 | 3.899001994  | 9.66E-05    | 0.098297916 |
| Acinar          | CD320       | 65.02922298 | -0.966767462   | 0.248072712 | -3.897113291 | 9.73E-05    | 0.098297916 |
| Acinar          | NAMPT       | 242.5727244 | 1.06467958     | 0.277867202 | 3.831612985  | 0.000127306 | 0.098458614 |
| Acinar          | DNAJA1      | 217.5242773 | 0.849407766    | 0.22171002  | 3.831165439  | 0.000127538 | 0.098458614 |
| Acinar          | H19         | 53.79929964 | -3.294441383   | 0.865057403 | -3.808350025 | 0.000139897 | 0.098458614 |
| Acinar          | CREB1       | 47.78331638 | 0.789321402    | 0.208314536 | 3.789084608  | 0.000151203 | 0.098458614 |
| Acinar          | SPG11       | 57.35896833 | 0.779897923    | 0.205869551 | 3.788311181  | 0.000151675 | 0.098458614 |
| Active Stellate | RCAN1       | 41.21839119 | 1.620233759    | 0.314685419 | 5.148741132  | 2.62E-07    | 0.00241576  |
| Active Stellate | CCDC74A     | 13.22446766 | -1.682537235   | 0.378504454 | -4.445224402 | 8.78E-06    | 0.030499969 |
| Active Stellate | DPH2        | 10.45318818 | 1.236258154    | 0.279782906 | 4.418633616  | 9.93E-06    | 0.030499969 |
| Active Stellate | NOC3L       | 8.384928044 | 1.476201949    | 0.348004234 | 4.241908016  | 2.22E-05    | 0.05104082  |
| Active Stellate | PTGDS       | 832.2032279 | -1.641318141   | 0.401114227 | -4.091897099 | 4.28E-05    | 0.066381487 |
| Active Stellate | TNFAIP3     | 13.70986552 | 2.177364602    | 0.53659164  | 4.057768405  | 4.95E-05    | 0.066381487 |
| Active Stellate | HLA-B       | 601.5947226 | 1.036695044    | 0.255748636 | 4.053570175  | 5.04E-05    | 0.066381487 |
| Active Stellate | ATF3        | 67.56553625 | 1.470264995    | 0.368859289 | 3.985977955  | 6.72E-05    | 0.077383968 |
| Alpha           | TYMP        | 40.52488275 | 2.133848239    | 0.386172897 | 5.52562921   | 3.28E-08    | 0.000359496 |
| Alpha           | GHR1        | 1653.892432 | -5.831509665   | 1.117806999 | -5.216919979 | 1.82E-07    | 0.000678959 |
| Alpha           | ODF3B       | 31.8402632  | 2.462195174    | 0.472336832 | 5.212795206  | 1.86E-07    | 0.000678959 |
| Alpha           | PCDH4       | 80.80780414 | 1.422781552    | 0.284681701 | 4.997797713  | 5.80E-07    | 0.001587443 |
| Alpha           | MAB21L4     | 23.02192962 | -2.871179951   | 0.631679721 | -4.545309678 | 5.49E-06    | 0.00861368  |
| Alpha           | GBP2        | 26.60098823 | 3.373251368    | 0.745515906 | 4.524720854  | 6.05E-06    | 0.00861368  |
| Alpha           | ANXA3       | 15.83838415 | -2.681856892   | 0.594482874 | -4.511243319 | 6.44E-06    | 0.00861368  |
| Alpha           | HLA-B       | 2788.219821 | 1.556316993    | 0.345618707 | 4.502988293  | 6.70E-06    | 0.00861368  |
| Alpha           | HES1        | 109.9061343 | 2.078043921    | 0.462684416 | 4.491277102  | 7.08E-06    | 0.00861368  |
| Alpha           | PSMB9       | 29.61930067 | 2.641061444    | 0.604019899 | 4.372474233  | 1.23E-05    | 0.013451672 |
| Alpha           | UTRN        | 36.08847742 | 1.866450586    | 0.437408278 | 4.267067364  | 1.98E-05    | 0.01971591  |
| Alpha           | ZFP36       | 321.6353843 | 1.92442653     | 0.45526456  | 4.227051038  | 2.37E-05    | 0.021605625 |
| Alpha           | HSPA6       | 563.1938489 | -5.403469774   | 1.289176367 | -4.191412372 | 2.77E-05    | 0.023350728 |
| Alpha           | BET1        | 62.98500588 | 1.240846428    | 0.301648872 | 4.113545727  | 3.90E-05    | 0.030474462 |
| Alpha           | TAP1        | 46.24037899 | 1.678014324    | 0.416755336 | 4.02637754   | 5.66E-05    | 0.040734868 |
| Alpha           | BAG1        | 551.3514352 | -0.90452856    | 0.225304106 | -4.014700736 | 5.95E-05    | 0.040734868 |
| Alpha           | STBD1       | 102.1197412 | 1.262082009    | 0.318485641 | 3.96275953   | 7.41E-05    | 0.047721644 |
| Alpha           | AC099509.1  | 109.037963  | 2.811404745    | 0.723655527 | 3.885004178  | 0.000102328 | 0.062249612 |
| Alpha           | HIST2H2AAA4 | 43.98294475 | 2.460807117    | 0.637271996 | 3.861470662  | 0.000112707 | 0.064954563 |
| Alpha           | PRSS2       | 436.0125758 | -5.92659017    | 1.548406853 | -3.827540648 | 0.00012943  | 0.070862933 |
| Alpha           | TFF3        | 373.7326924 | -1.103792876   | 0.289855068 | -3.808085485 | 0.000140047 | 0.073024436 |
| Alpha           | MT1G        | 278.3850015 | -3.169620957   | 0.847431167 | -3.740269509 | 0.000183823 | 0.091493743 |
| Alpha           | ASGR1       | 43.60764089 | -1.196839772   | 0.323600469 | -3.698510628 | 0.000216868 | 0.095434964 |
| Alpha           | HSPA1A      | 679.0611106 | -2.727656322   | 0.739317003 | -3.689427286 | 0.000224759 | 0.095434964 |
| Alpha           | DDX59       | 35.8076381  | 0.707693959    | 0.19200847  | 3.685743447  | 0.000228036 | 0.095434964 |
| Alpha           | LACTB2      | 67.67144087 | 1.070207327    | 0.291584192 | 3.670320119  | 0.000242247 | 0.095434964 |
| Alpha           | CPA1        | 134.4707474 | -5.253817537   | 1.432894268 | -3.666577257 | 0.000245819 | 0.095434964 |
| Alpha           | PLEKHA1     | 432.4333104 | 0.982146832    | 0.268029329 | 3.664325976  | 0.000247991 | 0.095434964 |
| Alpha           | CRYAB       | 203.8961433 | -3.17848334    | 0.872214126 | -3.644154853 | 0.000268272 | 0.095434964 |
| Alpha           | C18orf21    | 50.41465486 | 0.602441505    | 0.165412537 | 3.642054676  | 0.000270471 | 0.095434964 |
| Alpha           | SLC44A4     | 50.96358249 | -0.838502767   | 0.230604842 | -3.636102174 | 0.000276795 | 0.095434964 |
| Alpha           | B2M         | 19046.14244 | 0.833765004    | 0.229424929 | 3.634151736  | 0.000278897 | 0.095434964 |
| Alpha           | SEC16A      | 136.4051071 | -0.656721972   | 0.182321356 | -3.602002464 | 0.000315775 | 0.099907871 |
| Alpha           | RGS4        | 398.1310093 | 1.322550348    | 0.367299765 | 3.600738347  | 0.000317315 | 0.099907871 |
| Alpha           | EIF3B       | 220.2506491 | -0.590013578   | 0.16393438  | -3.599083844 | 0.00031934  | 0.099907871 |
| Alpha+Beta      | MEG3        | 23.88972115 | -3.789945598   | 0.798695606 | -4.74516896  | 2.08E-06    | 0.003281235 |
| Alpha+Beta      | HLA-A       | 122.7696048 | 1.760194586    | 0.388503567 | 4.530703793  | 5.88E-06    | 0.004116531 |
| Alpha+Beta      | TSPAN13     | 11.59110046 | -2.696724692   | 0.607919803 | -4.43598757  | 9.17E-06    | 0.004116531 |
| Alpha+Beta      | CCDC12      | 14.42146132 | -2.03798525    | 0.464004476 | -4.392167221 | 1.12E-05    | 0.004116531 |
| Alpha+Beta      | HLA-C       | 49.43686363 | 1.717155217    | 0.395144002 | 4.345644134  | 1.39E-05    | 0.004116531 |
| Alpha+Beta      | HLA-B       | 40.20282316 | 1.976750779    | 0.457699448 | 4.318883904  | 1.57E-05    | 0.004116531 |
| Alpha+Beta      | HERPUD1     | 127.5123264 | -2.989866102   | 0.709961198 | -4.211309168 | 2.54E-05    | 0.005712637 |
| Alpha+Beta      | WIPI2       | 9.051765776 | -1.96842225    | 0.506178933 | -3.888787386 | 0.000100746 | 0.016224759 |
| Alpha+Beta      | NEMF        | 8.23030797  | -2.211031656   | 0.570006436 | -3.87895911  | 0.000104904 | 0.016224759 |
| Alpha+Beta      | SEC61B      | 57.54710165 | -0.847566257   | 0.219213759 | -3.866391698 | 0.000110457 | 0.016224759 |
| Alpha+Beta      | SEC31A      | 15.45126318 | -2.230055709   | 0.577711652 | -3.860153593 | 0.000113316 | 0.016224759 |
| Alpha+Beta      | RAB18       | 14.41932563 | -1.36174741    | 0.365344807 | -3.727293734 | 0.000193547 | 0.025403023 |
| Alpha+Beta      | NEAT1       | 576.4413844 | -3.151959366   | 0.85551622  | -3.684277742 | 0.000229352 | 0.027786883 |
| Alpha+Beta      | DUSP1       | 10.15824729 | -2.161745489   | 0.594748459 | -3.6347223   | 0.00027828  | 0.031306525 |



|            |                  |             |              |             |              |             |             |
|------------|------------------|-------------|--------------|-------------|--------------|-------------|-------------|
| Alpha+Beta | <i>SERP1</i>     | 19.18556135 | -1.261547003 | 0.349588186 | -3.608666003 | 0.000307776 | 0.032316433 |
| Alpha+Beta | <i>INS</i>       | 42198.71679 | -4.496718068 | 1.267372553 | -3.54806332  | 0.000388075 | 0.038201124 |
| Alpha+Beta | <i>RBM25</i>     | 28.11426403 | -1.975495517 | 0.559391554 | -3.531507586 | 0.000413198 | 0.038276281 |
| Alpha+Beta | <i>P4HB</i>      | 28.61762976 | -1.255428284 | 0.357021009 | -3.516398905 | 0.000437443 | 0.038276281 |
| Alpha+Beta | <i>DDX46</i>     | 12.7868414  | -1.69314903  | 0.491344392 | -3.445951675 | 0.000569052 | 0.040773526 |
| Alpha+Beta | <i>HDLBP</i>     | 13.7822211  | -1.529603285 | 0.445405447 | -3.434181812 | 0.000594345 | 0.040773526 |
| Alpha+Beta | <i>MT1X</i>      | 16.85376664 | -2.491356818 | 0.729427365 | -3.41549678  | 0.000636658 | 0.040773526 |
| Alpha+Beta | <i>RPL39</i>     | 240.9235179 | 0.66683457   | 0.195813072 | 3.405465028  | 0.000660515 | 0.040773526 |
| Alpha+Beta | <i>RPS27</i>     | 470.0961902 | 0.765848726  | 0.225591906 | 3.394841327  | 0.000686684 | 0.040773526 |
| Alpha+Beta | <i>SELENOW</i>   | 22.02647033 | -1.354048423 | 0.399122023 | -3.392567544 | 0.000692409 | 0.040773526 |
| Alpha+Beta | <i>B2M</i>       | 322.7669582 | 1.211193449  | 0.357066613 | 3.392065807  | 0.000693678 | 0.040773526 |
| Alpha+Beta | <i>GCG</i>       | 5056.006888 | 2.866088932  | 0.848280695 | 3.378703474  | 0.000728285 | 0.040773526 |
| Alpha+Beta | <i>SRP19</i>     | 23.64040194 | -1.167026922 | 0.345855218 | -3.374322151 | 0.000739977 | 0.040773526 |
| Alpha+Beta | <i>SPAG9</i>     | 16.65179099 | -2.103905037 | 0.625191663 | -3.365216081 | 0.000764837 | 0.040773526 |
| Alpha+Beta | <i>SCFD1</i>     | 8.471091257 | -1.861596074 | 0.5535905   | -3.362767374 | 0.000771654 | 0.040773526 |
| Alpha+Beta | <i>TTC19</i>     | 9.577774073 | -1.818754269 | 0.541136599 | -3.36098921  | 0.000776639 | 0.040773526 |
| Alpha+Beta | <i>ARL8B</i>     | 8.753223125 | -1.70318934  | 0.512812844 | -3.321268882 | 0.000896092 | 0.045527236 |
| Alpha+Beta | <i>IBTK</i>      | 14.27028918 | -1.954153377 | 0.593217278 | -3.294161263 | 0.000987158 | 0.048586706 |
| Alpha+Beta | <i>RPS29</i>     | 278.591762  | 0.877219489  | 0.267667854 | 3.277268738  | 0.001048166 | 0.050026083 |
| Alpha+Beta | <i>SSR3</i>      | 13.62472418 | -1.191533566 | 0.366012105 | -3.255448527 | 0.001132134 | 0.051179306 |
| Alpha+Beta | <i>SEC62</i>     | 34.83768459 | -1.179642587 | 0.362503944 | -3.254151045 | 0.001137318 | 0.051179306 |
| Alpha+Beta | <i>SF3B5</i>     | 23.49714423 | -0.812165516 | 0.25236659  | -3.21819745  | 0.00128999  | 0.056437055 |
| Alpha+Beta | <i>TMEM165</i>   | 9.479605398 | -1.862357802 | 0.58030478  | -3.209275307 | 0.0013307   | 0.056644666 |
| Alpha+Beta | <i>NNMT</i>      | 14.64172217 | -1.426360589 | 0.447198227 | -3.189548845 | 0.001424951 | 0.059060451 |
| Alpha+Beta | <i>TRAPPC5</i>   | 18.40199938 | -1.112676822 | 0.349721227 | -3.181610769 | 0.001464585 | 0.059146704 |
| Alpha+Beta | <i>VAPA</i>      | 31.74931929 | -0.996518321 | 0.316038345 | -3.153156374 | 0.001615153 | 0.063081068 |
| Alpha+Beta | <i>TXNL4A</i>    | 18.99544013 | -0.776141306 | 0.246525436 | -3.1483214   | 0.00164211  | 0.063081068 |
| Alpha+Beta | <i>RAP1B</i>     | 14.07673148 | -1.033767467 | 0.330202265 | -3.130709798 | 0.001743844 | 0.064447827 |
| Alpha+Beta | <i>ARID4A</i>    | 8.531810449 | -1.890662937 | 0.606135878 | -3.119206443 | 0.001813389 | 0.064447827 |
| Alpha+Beta | <i>TCF25</i>     | 18.75312333 | -1.289184907 | 0.413359843 | -3.118795718 | 0.001815918 | 0.064447827 |
| Alpha+Beta | <i>ANAPC5</i>    | 9.510488839 | -1.390347231 | 0.447868407 | -3.104365498 | 0.001906876 | 0.064447827 |
| Alpha+Beta | <i>TOX4</i>      | 8.534702063 | -1.906759126 | 0.614276465 | -3.10407322  | 0.001908761 | 0.064447827 |
| Alpha+Beta | <i>DNAJC7</i>    | 9.767847238 | -1.278736045 | 0.412746956 | -3.098111387 | 0.001947582 | 0.064447827 |
| Alpha+Beta | <i>CRELD2</i>    | 7.789821654 | -1.602911305 | 0.518045326 | -3.094152625 | 0.001973759 | 0.064447827 |
| Alpha+Beta | <i>RIOK3</i>     | 20.85960196 | -1.710263064 | 0.554388826 | -3.084952262 | 0.002035848 | 0.064447827 |
| Alpha+Beta | <i>RBM4</i>      | 13.67650282 | -1.211833137 | 0.393008531 | -3.083477942 | 0.002045963 | 0.064447827 |
| Alpha+Beta | <i>KRT10</i>     | 53.50215786 | -0.774462298 | 0.252255295 | -3.07015279  | 0.002139493 | 0.066002044 |
| Alpha+Beta | <i>PRPF8</i>     | 9.498413011 | -1.555802009 | 0.507887955 | -3.063278021 | 0.002189266 | 0.066002044 |
| Alpha+Beta | <i>PEBP1</i>     | 53.33279634 | -0.799334007 | 0.262152233 | -3.049121486 | 0.002295116 | 0.066002044 |
| Alpha+Beta | <i>EEF1A1</i>    | 661.5802555 | 0.577245709  | 0.190337787 | 3.032743619  | 0.002423414 | 0.066002044 |
| Alpha+Beta | <i>HM13</i>      | 10.12029518 | -1.709395981 | 0.564156136 | -3.030005123 | 0.002445496 | 0.066002044 |
| Alpha+Beta | <i>TUBB4B</i>    | 13.20880832 | -1.66929134  | 0.550985966 | -3.029644027 | 0.002448421 | 0.066002044 |
| Alpha+Beta | <i>PKIB</i>      | 9.099339791 | -1.771349766 | 0.584968191 | -3.028112968 | 0.002460861 | 0.066002044 |
| Alpha+Beta | <i>ATP2A2</i>    | 9.310919635 | -1.99765637  | 0.66059574  | -3.024022484 | 0.002494379 | 0.066002044 |
| Alpha+Beta | <i>PIGP</i>      | 8.533776012 | -1.105155276 | 0.365500075 | -3.023680028 | 0.002497204 | 0.066002044 |
| Alpha+Beta | <i>AKAP9</i>     | 16.84905444 | -1.680801284 | 0.556564906 | -3.019955564 | 0.002528118 | 0.066002044 |
| Alpha+Beta | <i>VMP1</i>      | 13.96423957 | -1.9558581   | 0.6483651   | -3.016599907 | 0.00255627  | 0.066002044 |
| Alpha+Beta | <i>MARCH6</i>    | 10.91232545 | -1.790319779 | 0.594782046 | -3.010043411 | 0.002612104 | 0.066355856 |
| Alpha+Beta | <i>DDX24</i>     | 30.62675043 | -1.088476916 | 0.366554516 | -2.969481672 | 0.002983026 | 0.07421909  |
| Alpha+Beta | <i>PPP1R1A</i>   | 25.04564817 | -1.349749718 | 0.455312629 | -2.964446034 | 0.003032284 | 0.07421909  |
| Alpha+Beta | <i>YIPF4</i>     | 10.96209425 | -1.669935721 | 0.563911693 | -2.961342605 | 0.00306301  | 0.07421909  |
| Alpha+Beta | <i>ACADVL</i>    | 9.08815365  | -1.588673057 | 0.538293751 | -2.951312463 | 0.003164266 | 0.074351171 |
| Alpha+Beta | <i>RPL5</i>      | 315.1658191 | 0.441185968  | 0.149548502 | 2.950119595  | 0.003176509 | 0.074351171 |
| Alpha+Beta | <i>RPL22</i>     | 169.8158291 | 0.427422253  | 0.145042797 | 2.946869899  | 0.003210082 | 0.074351171 |
| Alpha+Beta | <i>RPL37A</i>    | 423.9621835 | 0.52207427   | 0.178847783 | 2.919098364  | 0.003510454 | 0.079143627 |
| Alpha+Beta | <i>ATP6V0E1</i>  | 33.02786395 | -0.679656789 | 0.23308906  | -2.915867396 | 0.003547012 | 0.079143627 |
| Alpha+Beta | <i>RNF7</i>      | 23.07501563 | -0.764621414 | 0.262391449 | -2.914048524 | 0.003567744 | 0.079143627 |
| Alpha+Beta | <i>SUN1</i>      | 10.94973194 | -1.144593352 | 0.393542234 | -2.90843842  | 0.003632387 | 0.079458467 |
| Alpha+Beta | <i>RPL36AL</i>   | 86.36474982 | -0.475992101 | 0.165084259 | -2.883328208 | 0.003934972 | 0.084898372 |
| Alpha+Beta | <i>PAFAH1B2</i>  | 8.991243469 | -1.407962361 | 0.489125856 | -2.878527773 | 0.003995361 | 0.085036399 |
| Alpha+Beta | <i>RTN4</i>      | 34.42514551 | -0.87178266  | 0.304646508 | -2.861620394 | 0.004214814 | 0.088511092 |
| Alpha+Beta | <i>MAP1LC3A</i>  | 14.25417007 | -1.069855523 | 0.374508449 | -2.856692619 | 0.004280802 | 0.088713984 |
| Alpha+Beta | <i>RPS27A</i>    | 511.5275116 | 0.447923505  | 0.157387448 | 2.845992557  | 0.004427323 | 0.090558879 |
| Alpha+Beta | <i>RAB7A</i>     | 12.19986779 | -0.965431579 | 0.341064505 | -2.830642195 | 0.004645466 | 0.093802673 |
| Alpha+Beta | <i>RAB11FIP1</i> | 15.16163196 | -1.587362664 | 0.562572566 | -2.821614064 | 0.004778264 | 0.095262862 |
| Alpha+Beta | <i>TMF1</i>      | 13.08281794 | -1.421696576 | 0.504639639 | -2.817251097 | 0.004843664 | 0.095359638 |
| Alpha+Beta | <i>SRPRA</i>     | 11.7766813  | -1.337782199 | 0.475714176 | -2.812155422 | 0.004921072 | 0.095687508 |
| Alpha+Beta | <i>MGST3</i>     | 16.21253099 | -1.052674666 | 0.376983991 | -2.792359067 | 0.005232526 | 0.099046708 |
| Alpha+Beta | <i>RPL21</i>     | 436.5950979 | 0.473926478  | 0.16980172  | 2.791058176  | 0.005253603 | 0.099046708 |
| Alpha+Beta | <i>RPL37</i>     | 251.1979459 | 0.62989535   | 0.225996106 | 2.787195598  | 0.005316638 | 0.099046708 |
| Alpha+Beta | <i>RPL11</i>     | 433.7390092 | 0.426660235  | 0.153174715 | 2.785448206  | 0.005345378 | 0.099046708 |
| Beta       | <i>CD74</i>      | 62.52347792 | 4.57582431   | 0.559485125 | 8.178634439  | 2.87E-16    | 3.39E-12    |
| Beta       | <i>HLA-C</i>     | 1851.612297 | 1.860963141  | 0.252779692 | 7.361996222  | 1.81E-13    | 1.07E-09    |

|      |              |             |              |             |              |          |             |
|------|--------------|-------------|--------------|-------------|--------------|----------|-------------|
| Beta | HLA-F        | 16.3246428  | 3.864079798  | 0.538294208 | 7.178378922  | 7.05E-13 | 2.78E-09    |
| Beta | HLA-A        | 3309.265196 | 1.692741955  | 0.238328027 | 7.102571928  | 1.22E-12 | 3.62E-09    |
| Beta | HLA-B        | 1576.110385 | 2.966443916  | 0.436889805 | 6.789913349  | 1.12E-11 | 2.65E-08    |
| Beta | B2M          | 8586.865487 | 1.695496672  | 0.254255288 | 6.668481455  | 2.58E-11 | 4.33E-08    |
| Beta | HLA-E        | 384.6740914 | 2.13376461   | 0.320533727 | 6.656911362  | 2.80E-11 | 4.33E-08    |
| Beta | STOM         | 41.14313238 | 1.869852012  | 0.281178518 | 6.650052876  | 2.93E-11 | 4.33E-08    |
| Beta | PSMB8        | 119.8332807 | 1.660240069  | 0.254473522 | 6.524215401  | 6.84E-11 | 8.98E-08    |
| Beta | GABRG2       | 29.36109955 | 3.987203858  | 0.648684177 | 6.146602618  | 7.92E-10 | 9.36E-07    |
| Beta | TAP1         | 30.21288371 | 2.174710896  | 0.36880452  | 5.896649241  | 3.71E-09 | 3.99E-06    |
| Beta | PSMB8-AS1    | 14.59760115 | 3.141443226  | 0.53923494  | 5.825741236  | 5.69E-09 | 5.60E-06    |
| Beta | PRG4         | 88.09157081 | 4.116304592  | 0.71513492  | 5.755983209  | 8.61E-09 | 7.83E-06    |
| Beta | PSMB9        | 19.22232702 | 3.149058691  | 0.548908491 | 5.736946582  | 9.64E-09 | 8.14E-06    |
| Beta | GAD1         | 34.91370486 | 2.901180719  | 0.510056475 | 5.687959784  | 1.29E-08 | 1.01E-05    |
| Beta | TUBB2B       | 254.7757782 | -1.503547744 | 0.266881968 | -5.633755452 | 1.76E-08 | 1.30E-05    |
| Beta | MDK          | 391.2658709 | 1.548662973  | 0.275454307 | 5.622213676  | 1.89E-08 | 1.31E-05    |
| Beta | GAST         | 19.40115381 | 4.366427802  | 0.786790994 | 5.549666729  | 2.86E-08 | 1.88E-05    |
| Beta | ZFP36        | 88.76452187 | 2.233226947  | 0.413814181 | 5.396690233  | 6.79E-08 | 4.22E-05    |
| Beta | BIRC3        | 22.11993539 | 2.940934493  | 0.557677949 | 5.273535554  | 1.34E-07 | 7.91E-05    |
| Beta | IFIT3        | 20.30650176 | 2.32795868   | 0.443542315 | 5.248560511  | 1.53E-07 | 8.63E-05    |
| Beta | PCDH10       | 16.89057168 | 2.930989357  | 0.560458075 | 5.22963177   | 1.70E-07 | 9.13E-05    |
| Beta | ANK3         | 17.42703148 | 2.669107381  | 0.518795731 | 5.144813696  | 2.68E-07 | 0.00013519  |
| Beta | CASP4        | 27.84277886 | 2.276194372  | 0.442819665 | 5.140228745  | 2.74E-07 | 0.00013519  |
| Beta | TMEM45B      | 16.35582002 | 2.865897359  | 0.560953177 | 5.108977852  | 3.24E-07 | 0.000153195 |
| Beta | IL18BP       | 13.35396611 | 2.95628846   | 0.582529661 | 5.074914902  | 3.88E-07 | 0.000170593 |
| Beta | CTSL         | 501.3210786 | 0.901049448  | 0.177581846 | 5.07399527   | 3.90E-07 | 0.000170593 |
| Beta | MT1X         | 1904.694105 | -2.791186185 | 0.558903345 | -4.994040936 | 5.91E-07 | 0.000249693 |
| Beta | FBXO22       | 116.8102952 | 0.989992809  | 0.199185807 | 4.970197542  | 6.69E-07 | 0.000272705 |
| Beta | LRCH2        | 11.24018017 | 1.922116079  | 0.38934609  | 4.936780228  | 7.94E-07 | 0.000313032 |
| Beta | CRIM1        | 43.96427119 | 1.853658425  | 0.376827809 | 4.919112611  | 8.69E-07 | 0.000330817 |
| Beta | SLC38A1      | 34.61907023 | 2.227280889  | 0.453311595 | 4.913355213  | 8.95E-07 | 0.000330817 |
| Beta | TSHR         | 11.35793837 | 2.632437837  | 0.541969504 | 4.857169666  | 1.19E-06 | 0.000426651 |
| Beta | AQP3         | 242.201051  | 3.285656859  | 0.678918566 | 4.839544865  | 1.30E-06 | 0.00045257  |
| Beta | GNS          | 187.7713608 | 0.917446817  | 0.190462637 | 4.81693855   | 1.46E-06 | 0.000492478 |
| Beta | SLC4A4       | 20.25323168 | 2.5886575    | 0.539311156 | 4.799933158  | 1.59E-06 | 0.000521302 |
| Beta | FABP5        | 243.1698153 | 3.192896003  | 0.670627639 | 4.761056386  | 1.93E-06 | 0.00061543  |
| Beta | NCOA7        | 113.5002168 | 2.077917904  | 0.438374719 | 4.740049588  | 2.14E-06 | 0.000664838 |
| Beta | AKAP12       | 92.59737648 | 2.544210501  | 0.541377677 | 4.699511284  | 2.61E-06 | 0.000790646 |
| Beta | CHGB         | 6574.538957 | 1.14529483   | 0.244079823 | 4.692296214  | 2.70E-06 | 0.00079858  |
| Beta | SAMD5        | 103.5987893 | 1.77301752   | 0.378462661 | 4.684788495  | 2.80E-06 | 0.000808211 |
| Beta | SYT1         | 30.62818397 | 3.206607586  | 0.68544894  | 4.678112983  | 2.90E-06 | 0.000815087 |
| Beta | SCYL3        | 19.57806742 | 1.428110766  | 0.306004985 | 4.666952623  | 3.06E-06 | 0.000840603 |
| Beta | KCNJ8        | 29.75495601 | 2.014320597  | 0.432900502 | 4.653079837  | 3.27E-06 | 0.000878775 |
| Beta | RPL3         | 25207.11018 | -0.767887319 | 0.16593476  | -4.627645948 | 3.70E-06 | 0.00097179  |
| Beta | SCN3A        | 15.47221723 | 1.977521212  | 0.427941283 | 4.621010617  | 3.82E-06 | 0.000981585 |
| Beta | PTP4A3       | 62.04176915 | 2.832320413  | 0.614813721 | 4.606794408  | 4.09E-06 | 0.001016671 |
| Beta | ICAM1        | 19.55677287 | 3.828115016  | 0.831318615 | 4.604871042  | 4.13E-06 | 0.001016671 |
| Beta | PPP1R1A      | 1641.904587 | -1.797705401 | 0.392974841 | -4.574606854 | 4.77E-06 | 0.001151308 |
| Beta | DKK3         | 69.73406749 | 2.982053028  | 0.654135938 | 4.558766543  | 5.15E-06 | 0.001215517 |
| Beta | PPP2R2B      | 20.31808071 | 2.452092194  | 0.538350108 | 4.554828088  | 5.24E-06 | 0.001215517 |
| Beta | PCDHB4       | 34.43286054 | 1.892694613  | 0.416048507 | 4.549216214  | 5.38E-06 | 0.001224377 |
| Beta | PPY          | 35647.59877 | 5.751205089  | 1.265418836 | 4.544902389  | 5.50E-06 | 0.001226143 |
| Beta | SELENOW      | 1716.321955 | -1.001972766 | 0.221233167 | -4.52903504  | 5.93E-06 | 0.001297436 |
| Beta | CD40         | 26.0136545  | 1.647939728  | 0.368016342 | 4.477898231  | 7.54E-06 | 0.001607219 |
| Beta | GIN1         | 24.50858191 | 1.42466609   | 0.31830309  | 4.475816085  | 7.61E-06 | 0.001607219 |
| Beta | ETV1         | 115.37279   | 1.708911252  | 0.382819564 | 4.464012328  | 8.04E-06 | 0.001640695 |
| Beta | IRF1         | 72.55010577 | 1.883493893  | 0.421938966 | 4.463901285  | 8.05E-06 | 0.001640695 |
| Beta | MSN          | 73.41806425 | 2.05553548   | 0.460865993 | 4.460158727  | 8.19E-06 | 0.001641311 |
| Beta | BOC          | 10.36928665 | 2.37520933   | 0.535486705 | 4.435608407  | 9.18E-06 | 0.001809321 |
| Beta | EPAS1        | 116.0560994 | 1.54772056   | 0.349925259 | 4.423003261  | 9.73E-06 | 0.001886767 |
| Beta | PRKAG2-AS1   | 60.7058864  | -1.315583683 | 0.298119158 | -4.412945783 | 1.02E-05 | 0.001944734 |
| Beta | SPOCK1       | 24.61584233 | 2.675708416  | 0.606813608 | 4.40944036   | 1.04E-05 | 0.001945106 |
| Beta | ARID4A       | 208.7001022 | 0.745104565  | 0.169143937 | 4.405150892  | 1.06E-05 | 0.001952997 |
| Beta | TAPBP        | 173.7930201 | 1.015039711  | 0.23113636  | 4.391518986  | 1.13E-05 | 0.00204758  |
| Beta | CTSS         | 11.8414508  | 2.386349067  | 0.549140271 | 4.345609298  | 1.39E-05 | 0.002488228 |
| Beta | SEL1L3       | 16.66071753 | 1.820683177  | 0.422171202 | 4.312665498  | 1.61E-05 | 0.002844454 |
| Beta | LCORL        | 100.8503708 | 1.088432374  | 0.252562719 | 4.309552799  | 1.64E-05 | 0.002844454 |
| Beta | PARVB        | 578.7528596 | -1.42588324  | 0.331895938 | -4.296175635 | 1.74E-05 | 0.002977762 |
| Beta | AL109613.1   | 36.62375683 | -1.581687603 | 0.368619008 | -4.290846565 | 1.78E-05 | 0.003006561 |
| Beta | LDHA         | 80.69796847 | 2.360668054  | 0.551338275 | 4.281705373  | 1.85E-05 | 0.003088669 |
| Beta | RG54         | 84.35657416 | 1.616728047  | 0.383223375 | 4.218761575  | 2.46E-05 | 0.004034084 |
| Beta | CLTRN        | 67.0088357  | -1.673570842 | 0.398350987 | -4.201246882 | 2.65E-05 | 0.004299545 |
| Beta | HIVEP1       | 41.00071314 | 1.252487049  | 0.298525024 | 4.195584794  | 2.72E-05 | 0.004320743 |
| Beta | TMEM161B-AS1 | 104.4740965 | 0.961587357  | 0.229276372 | 4.194009834  | 2.74E-05 | 0.004320743 |

|      |                          |             |              |             |              |             |             |
|------|--------------------------|-------------|--------------|-------------|--------------|-------------|-------------|
| Beta | <i>ISL1</i>              | 341.123744  | 1.32350987   | 0.317039968 | 4.174583658  | 2.99E-05    | 0.004587176 |
| Beta | <i>MT2A</i>              | 2999.225032 | -2.399573554 | 0.5748258   | -4.174436074 | 2.99E-05    | 0.004587176 |
| Beta | <i>MTUS1</i>             | 110.1702945 | 2.012884564  | 0.482660539 | 4.170393892  | 3.04E-05    | 0.004609444 |
| Beta | <i>SOD1</i>              | 1793.180078 | -0.551985976 | 0.132865385 | -4.154475405 | 3.26E-05    | 0.004864378 |
| Beta | <i>PHACTR1</i>           | 8.451708953 | 2.160942212  | 0.520594587 | 4.150911795  | 3.31E-05    | 0.004864378 |
| Beta | <i>BTN3A2</i>            | 10.50243971 | 2.292920778  | 0.55258041  | 4.149478945  | 3.33E-05    | 0.004864378 |
| Beta | <i>HIST2H2AA4</i>        | 30.48471149 | 2.711353665  | 0.655070925 | 4.139023058  | 3.49E-05    | 0.005029351 |
| Beta | <i>BAALC</i>             | 33.06801125 | 1.740874415  | 0.421290767 | 4.132239655  | 3.59E-05    | 0.005117734 |
| Beta | <i>CETN3</i>             | 83.1772677  | 1.338248071  | 0.325624032 | 4.109795163  | 3.96E-05    | 0.005537152 |
| Beta | <i>AC010478.1</i>        | 39.02029904 | 1.448050213  | 0.352609453 | 4.10666872   | 4.01E-05    | 0.005537152 |
| Beta | <i>BRD8</i>              | 58.59479881 | 0.975764441  | 0.237649089 | 4.105904397  | 4.03E-05    | 0.005537152 |
| Beta | <i>SPRED3</i>            | 15.96892752 | 1.380099131  | 0.336818128 | 4.097460959  | 4.18E-05    | 0.005676969 |
| Beta | <i>AK4</i>               | 35.20402606 | 1.549417609  | 0.380531854 | 4.071715927  | 4.67E-05    | 0.006270492 |
| Beta | <i>CRNKL1</i>            | 54.72211203 | 1.072496249  | 0.263634085 | 4.068124378  | 4.74E-05    | 0.006296358 |
| Beta | <i>GM2A</i>              | 44.80275165 | 1.016768554  | 0.251223219 | 4.047271426  | 5.18E-05    | 0.006800968 |
| Beta | <i>MLLT6</i>             | 105.838061  | 1.062169916  | 0.262593754 | 4.044916916  | 5.23E-05    | 0.006800968 |
| Beta | <i>C5orf56</i>           | 33.8362595  | 1.199003317  | 0.296806559 | 4.039679309  | 5.35E-05    | 0.006879041 |
| Beta | <i>SMOC1</i>             | 52.72244984 | 1.803688754  | 0.447082306 | 4.034355038  | 5.48E-05    | 0.006945121 |
| Beta | <i>MCMBP</i>             | 72.2981697  | 0.974437284  | 0.241810578 | 4.02975458   | 5.58E-05    | 0.006945121 |
| Beta | <i>PON2</i>              | 132.9343128 | 0.872500803  | 0.216836862 | 4.023766047  | 5.73E-05    | 0.006945121 |
| Beta | <i>DBI</i>               | 1223.756819 | -0.979237149 | 0.243436    | -4.022565065 | 5.76E-05    | 0.006945121 |
| Beta | <i>PLAAT4</i>            | 28.3416049  | 2.51915155   | 0.626703241 | 4.019688084  | 5.83E-05    | 0.006945121 |
| Beta | <i>STAT1</i>             | 106.4278263 | 0.996797302  | 0.248016887 | 4.019070284  | 5.84E-05    | 0.006945121 |
| Beta | <i>PDIA5</i>             | 20.89923013 | 1.161163071  | 0.288965112 | 4.018350392  | 5.86E-05    | 0.006945121 |
| Beta | <i>TENM3</i>             | 67.10035904 | 1.520182058  | 0.378456799 | 4.01679151   | 5.90E-05    | 0.006945121 |
| Beta | <i>CYB5D2</i>            | 190.3994405 | 0.816641533  | 0.203373315 | 4.01548026   | 5.93E-05    | 0.006945121 |
| Beta | <i>LRR8C-<i>DT</i></i>   | 19.40425348 | 1.242990734  | 0.310394374 | 4.004553044  | 6.21E-05    | 0.007202769 |
| Beta | <i>RAB27A</i>            | 126.3256389 | 1.100902045  | 0.275177202 | 4.000702234  | 6.32E-05    | 0.007248404 |
| Beta | <i>GTF2A1</i>            | 67.18707808 | 1.154753336  | 0.288799151 | 3.998465139  | 6.38E-05    | 0.007248404 |
| Beta | <i>TXNDC12</i>           | 191.8063755 | 0.526386645  | 0.131826575 | 3.993023739  | 6.52E-05    | 0.007346199 |
| Beta | <i>PLBD2</i>             | 73.66054874 | 0.959447451  | 0.240605758 | 3.98763295   | 6.67E-05    | 0.007382633 |
| Beta | <i>TAP2</i>              | 15.3601906  | 1.507048349  | 0.37795499  | 3.987375183  | 6.68E-05    | 0.007382633 |
| Beta | <i>ASB9</i>              | 209.0930529 | -2.255978118 | 0.566721491 | -3.980752723 | 6.87E-05    | 0.007471015 |
| Beta | <i>FGF14</i>             | 97.15419825 | 0.973001105  | 0.244520384 | 3.979222879  | 6.91E-05    | 0.007471015 |
| Beta | <i>TGFBR3L</i>           | 88.94189787 | -1.336858366 | 0.336064765 | -3.977978363 | 6.95E-05    | 0.007471015 |
| Beta | <i>DPYSL3</i>            | 81.17756506 | 1.545687726  | 0.389390573 | 3.969504745  | 7.20E-05    | 0.007671984 |
| Beta | <i>KCNQ10T1</i>          | 123.1592475 | 1.318931028  | 0.333081813 | 3.959780977  | 7.50E-05    | 0.007919814 |
| Beta | <i>GAMT</i>              | 331.388601  | -0.992817068 | 0.250867028 | -3.957543072 | 7.57E-05    | 0.007923611 |
| Beta | <i>CDKN2B-<i>AS1</i></i> | 10.79636969 | 1.614259749  | 0.408254116 | 3.954056278  | 7.68E-05    | 0.007949155 |
| Beta | <i>STEAP2</i>            | 32.28943418 | 1.152568162  | 0.291747922 | 3.950561686  | 7.80E-05    | 0.007949155 |
| Beta | <i>CITED1</i>            | 5.747019376 | 2.448234728  | 0.61972662  | 3.950507608  | 7.80E-05    | 0.007949155 |
| Beta | <i>SNAPIN</i>            | 81.20065577 | 0.80623865   | 0.20442734  | 3.943888583  | 8.02E-05    | 0.008102059 |
| Beta | <i>SUMF2</i>             | 155.284334  | 0.715676118  | 0.181796102 | 3.93669671   | 8.26E-05    | 0.008277893 |
| Beta | <i>DGCR6L</i>            | 317.974252  | -0.643351186 | 0.163512654 | -3.934565124 | 8.33E-05    | 0.008281516 |
| Beta | <i>ZNF33A</i>            | 120.7246686 | 0.955262525  | 0.243027712 | 3.930673237  | 8.47E-05    | 0.008342065 |
| Beta | <i>LMO4</i>              | 34.80856768 | 1.785720445  | 0.454519627 | 3.928808219  | 8.54E-05    | 0.008342065 |
| Beta | <i>ATG12</i>             | 245.7023881 | 0.758067503  | 0.193205957 | 3.923623859  | 8.72E-05    | 0.008453858 |
| Beta | <i>CELSR3</i>            | 40.68085475 | 1.020788919  | 0.260338063 | 3.92101296   | 8.82E-05    | 0.008476512 |
| Beta | <i>NUP85</i>             | 25.04238503 | 1.364353562  | 0.348151409 | 3.918851187  | 8.90E-05    | 0.008483913 |
| Beta | <i>LINC00685</i>         | 32.27779111 | 1.529484299  | 0.390851253 | 3.913213245  | 9.11E-05    | 0.008615065 |
| Beta | <i>SIAE</i>              | 22.72710916 | 1.004384654  | 0.257364727 | 3.90257307   | 9.52E-05    | 0.008892196 |
| Beta | <i>TMEM54</i>            | 255.9906123 | -0.925366534 | 0.237220702 | -3.900867527 | 9.58E-05    | 0.008892196 |
| Beta | <i>ASCL2</i>             | 159.7775043 | -2.050534411 | 0.525801544 | -3.899825769 | 9.63E-05    | 0.008892196 |
| Beta | <i>SCAF11</i>            | 394.2111171 | 0.68057601   | 0.175295498 | 3.882450013  | 0.000103409 | 0.009439148 |
| Beta | <i>TAPBP1</i>            | 35.99866808 | 1.267002758  | 0.326414089 | 3.881581094  | 0.00010378  | 0.009439148 |
| Beta | <i>MEIS1</i>             | 69.87629763 | 1.189323297  | 0.306668849 | 3.878200543  | 0.000105232 | 0.009498188 |
| Beta | <i>SERP1</i>             | 822.3633722 | -0.691349613 | 0.178531652 | -3.872420402 | 0.00010776  | 0.009637511 |
| Beta | <i>PRICKLE2</i>          | 16.4300838  | 1.691181452  | 0.436888938 | 3.870964229  | 0.000108406 | 0.009637511 |
| Beta | <i>TMEM37</i>            | 104.7086068 | -1.314251761 | 0.340300044 | -3.862038173 | 0.000112445 | 0.009881638 |
| Beta | <i>EYA3</i>              | 40.77960271 | 1.123966543  | 0.291091188 | 3.861218023  | 0.000112823 | 0.009881638 |
| Beta | <i>DNAJC22</i>           | 24.27224023 | 2.074416421  | 0.537982156 | 3.855920494  | 0.000115295 | 0.010023879 |
| Beta | <i>TNFRSF11B</i>         | 9.730507182 | 1.926294356  | 0.500134394 | 3.851553465  | 0.000117371 | 0.01012988  |
| Beta | <i>HAP1</i>              | 27.18617422 | 1.642464197  | 0.426823358 | 3.848112264  | 0.000119032 | 0.010198758 |
| Beta | <i>HMGN2</i>             | 1864.560847 | 0.572416093  | 0.148886428 | 3.844649249  | 0.000120725 | 0.010269441 |
| Beta | <i>KIF16B</i>            | 31.92191987 | 1.107774943  | 0.289532141 | 3.826086256  | 0.000130197 | 0.010990253 |
| Beta | <i>MT1F</i>              | 478.8948934 | -1.731843004 | 0.452833037 | -3.82446258  | 0.000131058 | 0.010990253 |
| Beta | <i>SPG11</i>             | 45.04362204 | 0.823449521  | 0.21559044  | 3.819508503  | 0.000133718 | 0.011082722 |
| Beta | <i>ID2</i>               | 186.6630653 | 1.233490851  | 0.32313063  | 3.817313298  | 0.000134913 | 0.011082722 |
| Beta | <i>ZRANB2</i>            | 234.4374993 | 0.871808751  | 0.228389319 | 3.817204574  | 0.000134972 | 0.011082722 |
| Beta | <i>TLE4</i>              | 70.58702472 | 1.15427488   | 0.302755716 | 3.812561811  | 0.000137534 | 0.011215172 |
| Beta | <i>SMC6</i>              | 59.09529141 | 0.923268313  | 0.242440194 | 3.808231213  | 0.000139964 | 0.01131468  |
| Beta | <i>GLB1L2</i>            | 13.3636173  | 1.512537084  | 0.397308887 | 3.806955079  | 0.000140688 | 0.01131468  |
| Beta | <i>ZSWIM6</i>            | 25.30853989 | 1.498535823  | 0.393800092 | 3.805313158  | 0.000141625 | 0.01131468  |

|      |            |             |              |             |               |             |             |
|------|------------|-------------|--------------|-------------|---------------|-------------|-------------|
| Beta | PDE4B      | 17.17586746 | 1.864691728  | 0.490510698 | 3.801531211   | 0.000143805 | 0.011411717 |
| Beta | SCG2       | 2320.20795  | 1.014195395  | 0.267043162 | 3.797870677   | 0.000145944 | 0.011504313 |
| Beta | S100A6     | 2749.339723 | 1.034068979  | 0.27259359  | 3.793445693   | 0.000148571 | 0.011633809 |
| Beta | GLI1DR     | 61.41451079 | -0.974671573 | 0.257530887 | -3.78467836   | 0.000153907 | 0.011948335 |
| Beta | PCDHB12    | 5.771874339 | 1.879051861  | 0.496754842 | 3.782654347   | 0.000155165 | 0.011948335 |
| Beta | IL13RA1    | 102.8551794 | 1.058000883  | 0.279823317 | 3.780960412   | 0.000156225 | 0.011948335 |
| Beta | TSPAN1     | 141.4524467 | -1.612645331 | 0.42659017  | -3.780315262  | 0.00015663  | 0.011948335 |
| Beta | CTTNBP2NL  | 15.68854589 | 1.541558938  | 0.408290198 | 3.775645231   | 0.000159594 | 0.012096407 |
| Beta | MAN2B2     | 45.45422767 | 0.901019448  | 0.238877702 | 3.771885953   | 0.000162018 | 0.01220194  |
| Beta | TYMP       | 21.56942454 | 1.182914721  | 0.314987921 | 3.75542883    | 0.000173045 | 0.012949894 |
| Beta | GRAMD4     | 25.91503643 | 1.279898869  | 0.341292803 | 3.750149014   | 0.00017673  | 0.013142452 |
| Beta | RIF1       | 79.05186571 | 0.967603351  | 0.258161551 | 3.748053685   | 0.000178212 | 0.013169875 |
| Beta | RSRP1      | 155.0751243 | 0.872582884  | 0.232915742 | 3.746345677   | 0.000179429 | 0.013177466 |
| Beta | UBE2S      | 302.1766026 | -0.69242629  | 0.184968721 | -3.743477741  | 0.000181491 | 0.013223839 |
| Beta | BMF        | 30.6052784  | 1.659517981  | 0.443455796 | 3.742239916   | 0.000182387 | 0.013223839 |
| Beta | ADAMTSL2   | 32.20130591 | 1.256729134  | 0.335973849 | 3.740556405   | 0.000183613 | 0.013223839 |
| Beta | ZNF480     | 59.2433636  | 0.861260709  | 0.230403069 | 3.738060924   | 0.000185445 | 0.013223839 |
| Beta | SOX4       | 182.2190647 | 1.382817103  | 0.369956846 | 3.737779467   | 0.000185653 | 0.013223839 |
| Beta | WDR75      | 27.20717794 | 1.067887267  | 0.285855565 | 3.735758188   | 0.00018715  | 0.0132507   |
| Beta | LINC00324  | 21.03403233 | 1.689547916  | 0.453231849 | 3.727778442   | 0.000193175 | 0.013595846 |
| Beta | MDF1C      | 51.01027008 | 1.374186252  | 0.369466767 | 3.71937715    | 0.000199715 | 0.013959677 |
| Beta | ZC3H12A    | 18.3018321  | 1.620953192  | 0.435959668 | 3.718126495   | 0.000200706 | 0.013959677 |
| Beta | EHF        | 40.72212451 | 1.485494574  | 0.399813929 | 3.715464788   | 0.000202831 | 0.014024959 |
| Beta | RARS       | 135.1033528 | 0.7438843    | 0.200614104 | 3.708035912   | 0.000208873 | 0.014358807 |
| Beta | PLXNB2     | 166.1049972 | 0.764472897  | 0.206690761 | 3.698631201   | 0.000216765 | 0.014784744 |
| Beta | BCAT2      | 97.85114264 | -0.997648143 | 0.269905855 | -3.696281964  | 0.00021878  | 0.014784744 |
| Beta | IAPP       | 15320.12476 | -3.005906778 | 0.813548049 | -3.694811614  | 0.00022005  | 0.014784744 |
| Beta | GNG12      | 143.2903362 | 0.764275307  | 0.206852294 | 3.69478767    | 0.000220071 | 0.014784744 |
| Beta | ZNF503     | 198.572694  | 1.137874947  | 0.308108124 | 3.693102704   | 0.000221534 | 0.014799005 |
| Beta | UNC5B      | 94.50400817 | 1.442025497  | 0.391210701 | 3.686058415   | 0.000227754 | 0.015060826 |
| Beta | ABCB4      | 7.66707969  | 1.761437566  | 0.47790062  | 3.685782131   | 0.000228001 | 0.015060826 |
| Beta | DLG2       | 50.36024157 | 0.994726399  | 0.27011221  | 3.682641375   | 0.00023083  | 0.015162952 |
| Beta | TRIP10     | 21.35505996 | 1.0043596    | 0.273016201 | 3.678754584   | 0.000234376 | 0.015227211 |
| Beta | DYNC2LI1   | 119.674139  | 0.701582643  | 0.190730793 | 3.678392102   | 0.000234709 | 0.015227211 |
| Beta | LGALS3BP   | 390.5076713 | 0.811421448  | 0.220701236 | 3.67656051    | 0.0002364   | 0.015227211 |
| Beta | LGMN       | 169.7072876 | 0.746547046  | 0.203089159 | 3.675957145   | 0.000236959 | 0.015227211 |
| Beta | DLK1       | 1829.836954 | -2.157629175 | 0.587507558 | -3.67251305   | 0.000240177 | 0.01523956  |
| Beta | MAP2       | 254.1672786 | 1.038315072  | 0.282743203 | 3.672290117   | 0.000240387 | 0.01523956  |
| Beta | FHL1       | 160.7321805 | 0.841581959  | 0.229271045 | 3.670685754   | 0.000241901 | 0.01523956  |
| Beta | ODF3B      | 30.21335781 | 1.687347585  | 0.459945797 | 3.668579206   | 0.000243902 | 0.01523956  |
| Beta | RG517      | 148.50541   | 0.849215177  | 0.231570614 | 3.667197503   | 0.000245223 | 0.01523956  |
| Beta | AC132217.2 | 164.2200034 | -1.657241614 | 0.451959495 | -3.666792342  | 0.000245612 | 0.01523956  |
| Beta | CNN3       | 25.79985668 | 1.574764855  | 0.429535033 | 3.666208185   | 0.000246174 | 0.01523956  |
| Beta | LUC7L3     | 296.549619  | 0.737228057  | 0.201321697 | 3.661940403   | 0.000250312 | 0.015415053 |
| Beta | ZC3H13     | 219.7692195 | 0.648939559  | 0.177334052 | 3.659418768   | 0.000252788 | 0.015486864 |
| Beta | ARHGEF40   | 36.5873366  | 0.913196667  | 0.249820195 | 3.655415711   | 0.000256766 | 0.015649464 |
| Beta | RBM38      | 33.29642268 | 1.043331472  | 0.285576677 | 3.653419745   | 0.000258771 | 0.015673662 |
| Beta | GCSH       | 331.6580632 | -0.615672488 | 0.168614049 | -3.651371231  | 0.000260844 | 0.015673662 |
| Beta | PRCP       | 134.4659173 | 0.652234818  | 0.178641586 | 3.65108054    | 0.000261139 | 0.015673662 |
| Beta | USP10      | 59.99633671 | 0.772616472  | 0.211852618 | 3.646952675   | 0.000265369 | 0.015847073 |
| Beta | SETX       | 139.7373247 | 0.840124098  | 0.230520615 | 3.64446407    | 0.00026795  | 0.015920782 |
| Beta | MSMB       | 12.62868283 | 2.519591915  | 0.692778679 | 3.636936284   | 0.0002759   | 0.016311217 |
| Beta | ERF        | 76.38308791 | 1.397306656  | 0.385353171 | 3.626041675   | 0.000287799 | 0.016930022 |
| Beta | FIGN       | 5.350125124 | 2.301268886  | 0.634930363 | 3.624442961   | 0.000289585 | 0.016944773 |
| Beta | PLD3       | 907.3602452 | 0.667025486  | 0.184095518 | 3.623257599   | 0.000290916 | 0.016944773 |
| Beta | LSG1       | 37.76599456 | 0.907119134  | 0.250681614 | 3.618610548   | 0.000296189 | 0.017167345 |
| Beta | TXNIP      | 253.1551331 | 1.31997767   | 0.365076908 | 3.615615341   | 0.000299635 | 0.017282364 |
| Beta | PCNX4      | 110.8031186 | 0.743120446  | 0.205740925 | 3.61192333    | 0.000303934 | 0.017445246 |
| Beta | PRPF38A    | 95.31457696 | 0.781622494  | 0.216958969 | 3.602628167   | 0.000315016 | 0.017993957 |
| Beta | ZNF827     | 79.54553714 | 1.139482593  | 0.316580904 | 3.599340885   | 0.000319025 | 0.018135331 |
| Beta | GGT7       | 33.35333136 | 0.880081912  | 0.244664507 | 3.597096786   | 0.000321789 | 0.018167157 |
| Beta | ZNF317     | 38.95824704 | 0.85565406   | 0.237919925 | 3.596395138   | 0.000322658 | 0.018167157 |
| Beta | SYNJ1      | 33.02720911 | 1.000874389  | 0.278788527 | 3.590084564   | 0.000330571 | 0.018524493 |
| Beta | SMPD3      | 11.82944616 | 1.612669457  | 0.449356804 | 3.58883952    | 0.000332153 | 0.018525376 |
| Beta | TRMU       | 100.8672273 | 0.755032397  | 0.21103883  | 3.577694189   | 0.000346639 | 0.019242515 |
| Beta | SPTY2D1    | 120.7934702 | 0.843908412  | 0.235999059 | 3.575897355   | 0.000349029 | 0.019284645 |
| Beta | QSOX1      | 116.6798582 | 0.955500991  | 0.267363363 | 3.573791781   | 0.000351849 | 0.019350045 |
| Beta | NUP93      | 30.47166449 | 0.826725119  | 0.23209173  | 3.562061945   | 0.000367954 | 0.020142049 |
| Beta | USF1       | 14.26511843 | 1.418213331  | 0.398487109 | 3.558994254   | 0.000372278 | 0.020229063 |
| Beta | FLT3LG     | 7.010540275 | 1.575032313  | 0.442738798 | 3.557475245   | 0.000374436 | 0.020229063 |
| Beta | ENTPD3     | 168.5357805 | -0.954106209 | 0.268210224 | -3.5573707381 | 0.000374676 | 0.020229063 |
| Beta | FOXO3      | 166.2163392 | 0.893901579  | 0.251505807 | 3.554198562   | 0.000379133 | 0.020376667 |
| Beta | PIAS3      | 33.69051864 | 0.884552078  | 0.249127504 | 3.550599842   | 0.000384354 | 0.020563826 |

|      |            |             |              |             |              |             |             |
|------|------------|-------------|--------------|-------------|--------------|-------------|-------------|
| Beta | SLC8A3     | 8.000856264 | 1.787296092  | 0.503649977 | 3.548686934  | 0.000387157 | 0.020620475 |
| Beta | FUT11      | 52.03168314 | 0.947726645  | 0.267332762 | 3.545119709  | 0.000392435 | 0.020807844 |
| Beta | SST        | 69589.31943 | 2.304482345  | 0.650910318 | 3.54039916   | 0.000399522 | 0.021089069 |
| Beta | CL2orf75   | 1568.978323 | -0.789814435 | 0.223263121 | -3.537594709 | 0.000403789 | 0.021219579 |
| Beta | SPATS2L    | 84.33161853 | 1.363756212  | 0.385816014 | 3.534732003  | 0.000408189 | 0.021355867 |
| Beta | ZNF462     | 86.57145086 | 0.928181213  | 0.262770935 | 3.532282644  | 0.000411989 | 0.021366397 |
| Beta | LLPH       | 190.985054  | 0.463652969  | 0.131261941 | 3.532272679  | 0.000412004 | 0.021366397 |
| Beta | PPRC1      | 22.43190346 | 0.948636649  | 0.268735983 | 3.529994902  | 0.000415568 | 0.021457084 |
| Beta | AL592295.5 | 13.81447359 | 1.486547047  | 0.421647977 | 3.52556428   | 0.000422582 | 0.021724369 |
| Beta | ZCCHC3     | 80.4402671  | 0.690907693  | 0.196278673 | 3.520034456  | 0.000431491 | 0.021900593 |
| Beta | TMEM176A   | 224.3446539 | 1.585254066  | 0.450363967 | 3.519939832  | 0.000431645 | 0.021900593 |
| Beta | SLC44A3    | 7.890746298 | 1.801253577  | 0.511764043 | 3.519695454  | 0.000432043 | 0.021900593 |
| Beta | POLD3      | 56.4299655  | 0.973721478  | 0.276718706 | 3.518813359  | 0.000433482 | 0.021900593 |
| Beta | HSPA2      | 35.33184858 | 0.971379715  | 0.276173488 | 3.517280825  | 0.000435992 | 0.021900593 |
| Beta | SCO1       | 96.85055306 | 0.659194791  | 0.18745266  | 3.51659342   | 0.000437123 | 0.021900593 |
| Beta | NSG1       | 126.0805933 | -1.313398864 | 0.374278265 | -3.509150781 | 0.00044954  | 0.022427682 |
| Beta | PPT1       | 281.9276319 | 0.563454912  | 0.160779027 | 3.50452992   | 0.000457414 | 0.022724643 |
| Beta | SSX2IP     | 133.8543118 | 1.013111505  | 0.289286849 | 3.502100104  | 0.000461606 | 0.022820302 |
| Beta | SCN2A      | 23.37892218 | 1.406427779  | 0.401700864 | 3.501181861  | 0.0004632   | 0.022820302 |
| Beta | IRF2       | 61.60866184 | 1.272019877  | 0.363610155 | 3.498306797  | 0.000468222 | 0.022945442 |
| Beta | ANKRD37    | 68.74547001 | -0.93599236  | 0.267616681 | -3.497511278 | 0.000469621 | 0.022945442 |
| Beta | LINC01116  | 28.94256725 | 2.113396618  | 0.605134177 | 3.492442994  | 0.000478624 | 0.023289083 |
| Beta | TRMT13     | 29.85696649 | 1.097614055  | 0.314418441 | 3.490934092  | 0.000481335 | 0.02332502  |
| Beta | PRKAB2     | 57.40337163 | 0.87278249   | 0.251071563 | 3.476229963  | 0.000508516 | 0.024475873 |
| Beta | CA8        | 33.64680158 | 1.259667547  | 0.362546447 | 3.474499773  | 0.000511807 | 0.024475873 |
| Beta | RPF1       | 159.5943815 | 0.612665217  | 0.176366129 | 3.473825852  | 0.000513094 | 0.024475873 |
| Beta | LINC01315  | 60.93849107 | -0.964616762 | 0.277692671 | -3.473684624 | 0.000513364 | 0.024475873 |
| Beta | RTN4       | 2270.098111 | -0.431962584 | 0.124401282 | -3.472332259 | 0.000515957 | 0.024500721 |
| Beta | ZCCHC2     | 97.93971113 | 0.853820711  | 0.246309908 | 3.46644891   | 0.000527382 | 0.024923745 |
| Beta | RUNX1T1    | 96.07363111 | 0.909389333  | 0.26240581  | 3.46558384   | 0.000529082 | 0.024923745 |
| Beta | NAGA       | 28.3570723  | 0.976018287  | 0.281815294 | 3.463326182  | 0.000533541 | 0.025000337 |
| Beta | CTC1       | 16.7240245  | 1.324483268  | 0.38257991  | 3.461978097  | 0.000536221 | 0.025000337 |
| Beta | SCSGRF1    | 98.38405658 | -1.056120124 | 0.305218065 | -3.460214994 | 0.000539744 | 0.025000337 |
| Beta | TRIM27     | 103.2895432 | 0.690608624  | 0.199614262 | 3.459715845  | 0.000540746 | 0.025000337 |
| Beta | DDX60      | 6.80722557  | 1.819810053  | 0.526142325 | 3.458779055  | 0.00054263  | 0.025000337 |
| Beta | MPHOSPH10  | 176.1393208 | 0.563049671  | 0.16283093  | 3.457879101  | 0.000544446 | 0.025000337 |
| Beta | CREBBP     | 81.55804659 | 0.79343685   | 0.22949252  | 3.457353861  | 0.000545508 | 0.025000337 |
| Beta | BNIP3      | 545.8689178 | -0.497883843 | 0.144109287 | -3.454904633 | 0.000550487 | 0.025078654 |
| Beta | USP47      | 190.7125184 | 0.589624916  | 0.170686639 | 3.454429244  | 0.000551459 | 0.025078654 |
| Beta | DCAF1      | 30.61520201 | 0.998579632  | 0.289308399 | 3.451609545  | 0.000557253 | 0.025232905 |
| Beta | TMEM176B   | 262.0454877 | 1.615823985  | 0.468276287 | 3.450578284  | 0.000559387 | 0.025232905 |
| Beta | STAU2      | 103.4761848 | 0.960889098  | 0.278629838 | 3.448622388  | 0.000563454 | 0.025232905 |
| Beta | MPPE1      | 92.66276922 | 0.615034246  | 0.178415607 | 3.447199809  | 0.000566429 | 0.025232905 |
| Beta | FCHO2      | 40.22678873 | 0.92587585   | 0.26865816  | 3.446297142  | 0.000568325 | 0.025232905 |
| Beta | ABCC9      | 29.65758768 | 1.723022251  | 0.500217738 | 3.444544482  | 0.000572023 | 0.025232905 |
| Beta | LINC00342  | 43.46625533 | 1.023728567  | 0.297321973 | 3.44316485   | 0.000574949 | 0.025232905 |
| Beta | AC142472.1 | 35.2619372  | 1.149205548  | 0.33393353  | 3.441420053  | 0.000578669 | 0.025232905 |
| Beta | ARRDC3     | 98.45203913 | 1.231695463  | 0.357923633 | 3.441224187  | 0.000579089 | 0.025232905 |
| Beta | GCNT1      | 60.97323884 | 0.891825386  | 0.259230415 | 3.440280672  | 0.000581111 | 0.025232905 |
| Beta | SP4        | 44.15766756 | 0.968547527  | 0.281623059 | 3.439162725  | 0.000583516 | 0.025232905 |
| Beta | ZNF384     | 33.59835125 | 1.043276003  | 0.303374263 | 3.438907413  | 0.000584067 | 0.025232905 |
| Beta | MLF1       | 310.9313927 | -1.151805732 | 0.334938981 | -3.438852442 | 0.000584186 | 0.025232905 |
| Beta | PCDHB11    | 10.72271097 | 1.403304766  | 0.408139261 | 3.438298889  | 0.000585381 | 0.025232905 |
| Beta | PRRG4      | 32.79062281 | 1.394317305  | 0.405606005 | 3.437615041  | 0.000586861 | 0.025232905 |
| Beta | SCPEP1     | 133.1272896 | 0.711698413  | 0.207183228 | 3.435115962  | 0.0005923   | 0.02530404  |
| Beta | TMEM14A    | 242.4842914 | -0.791495662 | 0.230428288 | -3.434889306 | 0.000592796 | 0.02530404  |
| Beta | MUC13      | 42.64994338 | 2.155085195  | 0.627978577 | 3.431781392  | 0.000599631 | 0.025503717 |
| Beta | PCDHB16    | 39.5446118  | 1.098056465  | 0.320279386 | 3.428433147  | 0.000607076 | 0.025727839 |
| Beta | MITD1      | 89.16755978 | 0.741111499  | 0.216374591 | 3.425131831  | 0.000614501 | 0.025943191 |
| Beta | MESP1      | 64.20329195 | -1.066179788 | 0.311363432 | -3.424229307 | 0.000616546 | 0.025943191 |
| Beta | SYNC       | 64.81095734 | 1.275849859  | 0.372868224 | 3.421717855  | 0.000622269 | 0.026007906 |
| Beta | NFKB1      | 65.80909602 | 0.764213528  | 0.223348177 | 3.421624202  | 0.000622483 | 0.026007906 |
| Beta | RMST       | 9.287334813 | 1.571587428  | 0.459598403 | 3.419479739  | 0.00062741  | 0.026121466 |
| Beta | GORAB      | 20.50240212 | 1.063487197  | 0.311252441 | 3.416799539  | 0.000633619 | 0.026200624 |
| Beta | FBXO28     | 47.60916691 | 0.718213149  | 0.210203828 | 3.416746294  | 0.000633743 | 0.026200624 |
| Beta | PTRHD1     | 158.3916539 | -0.708309555 | 0.20752804  | -3.413078803 | 0.000642334 | 0.026463251 |
| Beta | LRRIC10B   | 305.2011287 | -0.997318572 | 0.292583655 | -3.408661263 | 0.000652825 | 0.026802088 |
| Beta | TMEM154    | 8.788831933 | 1.810474171  | 0.531374407 | 3.407153498  | 0.000656442 | 0.026857336 |
| Beta | LINC00839  | 34.01137668 | -1.210879123 | 0.355691659 | -3.404294399 | 0.000663352 | 0.026956055 |
| Beta | RIIAD1     | 169.8372167 | -1.074401035 | 0.315604057 | -3.404268773 | 0.000663414 | 0.026956055 |
| Beta | FBXL16     | 97.6315608  | 0.836824542  | 0.246231398 | 3.398528976  | 0.000677493 | 0.02735951  |
| Beta | C1orf53    | 46.90319652 | -1.261810398 | 0.371302454 | -3.398335737 | 0.000677972 | 0.02735951  |
| Beta | DUSP6      | 16.47356944 | 1.392981249  | 0.410055993 | 3.397051311  | 0.000681162 | 0.027394757 |

|      |                |             |              |             |              |             |             |
|------|----------------|-------------|--------------|-------------|--------------|-------------|-------------|
| Beta | CNTNAP5        | 11.29025574 | 1.732156749  | 0.510369438 | 3.393927259  | 0.00068898  | 0.027615249 |
| Beta | TMED6          | 357.4249678 | -1.606013939 | 0.473527881 | -3.391593199 | 0.000694875 | 0.02775745  |
| Beta | ATP1A3         | 7.910458404 | 1.488705281  | 0.439583111 | 3.386629841  | 0.000707568 | 0.028014076 |
| Beta | NGLY1          | 78.48649776 | 0.566462421  | 0.16727906  | 3.386331934  | 0.000708336 | 0.028014076 |
| Beta | BSG            | 1088.866737 | 0.498192516  | 0.14715487  | 3.385497988  | 0.000710492 | 0.028014076 |
| Beta | FILIP1L        | 62.45250988 | 1.657897536  | 0.489721547 | 3.385388178  | 0.000710777 | 0.028014076 |
| Beta | NRP1           | 18.7169234  | 1.470515866  | 0.434772339 | 3.382266384  | 0.000718904 | 0.028197976 |
| Beta | ZFHX3          | 234.9387263 | 0.933514491  | 0.276071693 | 3.381420536  | 0.000721121 | 0.028197976 |
| Beta | CTNBNB1        | 91.38130986 | 0.716611743  | 0.211961461 | 3.380858671  | 0.000722597 | 0.028197976 |
| Beta | KANK1          | 13.51437888 | 2.036167177  | 0.602789901 | 3.377905261  | 0.000730402 | 0.028377506 |
| Beta | TRMT5          | 31.26691443 | 0.809404084  | 0.239659733 | 3.377305293  | 0.000731998 | 0.028377506 |
| Beta | LRRCC1         | 17.26975351 | 1.211870636  | 0.358967873 | 3.375986342  | 0.000735516 | 0.028393925 |
| Beta | CD24           | 413.2507674 | -0.9540169   | 0.282642525 | -3.37534806  | 0.000737224 | 0.028393925 |
| Beta | AUXG01000058.1 | 128.4852911 | 1.401916273  | 0.415504393 | 3.374010709  | 0.000740815 | 0.028430153 |
| Beta | CAPS           | 142.134959  | -1.213792529 | 0.359843911 | -3.37310843  | 0.000743247 | 0.028430153 |
| Beta | VPS13D         | 60.44323838 | 0.842699835  | 0.249887267 | 3.372320024  | 0.000745378 | 0.028430153 |
| Beta | VWDE           | 57.36954651 | 0.984766703  | 0.292238407 | 3.369737443  | 0.000752398 | 0.028605654 |
| Beta | IST1           | 240.8588073 | 0.818086719  | 0.242860703 | 3.368542992  | 0.000755666 | 0.028620869 |
| Beta | SPAN33         | 45.12654467 | -1.394374633 | 0.414133781 | -3.366966661 | 0.000759999 | 0.028620869 |
| Beta | SERP2          | 132.614235  | -0.827711511 | 0.24592628  | -3.365689544 | 0.000763526 | 0.028620869 |
| Beta | POC1B          | 14.33460693 | 1.082782226  | 0.321734418 | 3.365453509  | 0.000764179 | 0.028620869 |
| Beta | AKR7A2         | 351.6005451 | -1.30808057  | 0.388708934 | -3.365192966 | 0.000764901 | 0.028620869 |
| Beta | ENTPD6         | 60.14103279 | 0.701253649  | 0.208532289 | 3.362806078  | 0.000771545 | 0.028768241 |
| Beta | CLDN3          | 316.9225096 | -0.861906694 | 0.256435057 | -3.361111017 | 0.000776296 | 0.028768241 |
| Beta | NOL8           | 59.01047125 | 0.772432778  | 0.22985427  | 3.360532645  | 0.000777923 | 0.028768241 |
| Beta | ZNF587         | 39.90767858 | 0.775350259  | 0.230772997 | 3.359796293  | 0.00078     | 0.028768241 |
| Beta | ACO12291.3     | 9.198565459 | 1.520515364  | 0.452609727 | 3.359440314  | 0.000781005 | 0.028768241 |
| Beta | PHIP           | 279.3036824 | 0.712424985  | 0.212220736 | 3.356999874  | 0.000787931 | 0.028923508 |
| Beta | PTPMT1         | 183.9959057 | -0.634420476 | 0.189027405 | -3.35623544  | 0.000790113 | 0.028923508 |
| Beta | ERAP1          | 17.32824563 | 1.295745252  | 0.386376374 | 3.353583031  | 0.000797725 | 0.029112029 |
| Beta | GPATCH11       | 91.4297745  | 0.996425611  | 0.297317706 | 3.351383354  | 0.000804089 | 0.029253997 |
| Beta | PCF11          | 142.8141469 | 0.652119623  | 0.194788109 | 3.347841028  | 0.000814437 | 0.029536477 |
| Beta | GPI            | 308.7693265 | 0.604164259  | 0.180508043 | 3.347021263  | 0.000816849 | 0.029536477 |
| Beta | CHAC1          | 15.93758154 | 1.804028391  | 0.53934761  | 3.344834313  | 0.000823317 | 0.029546683 |
| Beta | COX14          | 931.0156369 | -0.439383779 | 0.131364641 | -3.344764434 | 0.000823525 | 0.029546683 |
| Beta | CHD5           | 19.94557045 | 1.39091523   | 0.415894673 | 3.344392994  | 0.000824628 | 0.029546683 |
| Beta | GNL3L          | 39.6479056  | 1.03059898   | 0.308261363 | 3.343263558  | 0.000827992 | 0.02955318  |
| Beta | BBX            | 376.0978362 | 0.671483178  | 0.200883154 | 3.342655491  | 0.000829809 | 0.02955318  |
| Beta | TACC2          | 48.16005803 | 0.929406329  | 0.278514255 | 3.337015301  | 0.000846833 | 0.030068924 |
| Beta | RBBP7          | 227.9279255 | 0.505848842  | 0.151640964 | 3.335832405  | 0.000850444 | 0.030106742 |
| Beta | CREB1          | 65.66005799 | 0.859431678  | 0.257718941 | 3.334763342  | 0.00085372  | 0.030125741 |
| Beta | TNR            | 18.84377508 | 1.214417577  | 0.364252777 | 3.33399676   | 0.000856077 | 0.030125741 |
| Beta | SLC30A1        | 91.78252268 | -1.109664968 | 0.333178338 | -3.330543558 | 0.000866766 | 0.030403543 |
| Beta | PREB           | 77.13277527 | -0.815764712 | 0.2449898   | -3.329790513 | 0.000869113 | 0.030403543 |
| Beta | UTP25          | 19.17871499 | 1.03089446   | 0.30984998  | 3.327076096  | 0.000877624 | 0.030610698 |
| Beta | CDK17          | 30.94681132 | 0.883529637  | 0.265822752 | 3.323754756  | 0.000888143 | 0.030808312 |
| Beta | AP2B1          | 465.0084682 | 0.992857287  | 0.298725677 | 3.323642273  | 0.000888501 | 0.030808312 |
| Beta | NT5C2          | 73.34811096 | 0.681540588  | 0.20511481  | 3.322727345  | 0.00089142  | 0.030819152 |
| Beta | UGT8           | 29.63064064 | 1.028902606  | 0.309786638 | 3.321326615  | 0.000895906 | 0.030825819 |
| Beta | WDR3           | 24.6729122  | 0.993950091  | 0.299288808 | 3.321039966  | 0.000896827 | 0.030825819 |
| Beta | EGFL7          | 138.0927941 | -1.219906579 | 0.367652454 | -3.318097204 | 0.000906329 | 0.031010188 |
| Beta | SIM1           | 61.11148751 | 0.96442537   | 0.290783544 | 3.31664357   | 0.000911058 | 0.031010188 |
| Beta | PBX3           | 112.7225254 | 0.677973389  | 0.204426752 | 3.316461198  | 0.000911652 | 0.031010188 |
| Beta | DIRAS3         | 107.6772978 | 1.16845204   | 0.352506112 | 3.314700087  | 0.000917415 | 0.031010188 |
| Beta | NAA15          | 80.75972772 | 0.652669464  | 0.196931259 | 3.314199411  | 0.000919059 | 0.031010188 |
| Beta | SEC22A         | 31.36357212 | 0.863058612  | 0.260438915 | 3.31386195   | 0.000920169 | 0.031010188 |
| Beta | PCSK2          | 781.4860935 | 0.63710087   | 0.192259993 | 3.313746455  | 0.000920549 | 0.031010188 |
| Beta | ARID1A         | 127.512553  | 0.78773047   | 0.237859215 | 3.311750906  | 0.000927141 | 0.031111565 |
| Beta | PATJ           | 100.7947788 | 0.625421569  | 0.188878119 | 3.311244173  | 0.000928821 | 0.031111565 |
| Beta | PUM3           | 81.31022922 | 0.808099006  | 0.244218282 | 3.308921019  | 0.000936563 | 0.031191555 |
| Beta | KCNB1          | 24.61207765 | 1.305297989  | 0.394598395 | 3.307915102  | 0.000939933 | 0.031191555 |
| Beta | HOPX           | 818.3058724 | -1.006572373 | 0.304520036 | -3.305438901 | 0.000948278 | 0.031191555 |
| Beta | PARD6A         | 184.9792135 | -0.669479781 | 0.202562026 | -3.305060644 | 0.000949559 | 0.031191555 |
| Beta | JOSD2          | 131.5791669 | -1.152000093 | 0.348568835 | -3.304942891 | 0.000949958 | 0.031191555 |
| Beta | PARP14         | 25.58467752 | 0.896173882  | 0.271255782 | 3.303796422  | 0.000953851 | 0.031191555 |
| Beta | FAM200A        | 33.13563357 | 1.21858688   | 0.368844859 | 3.303792504  | 0.000953864 | 0.031191555 |
| Beta | ESF1           | 185.6983784 | 0.564385544  | 0.170835675 | 3.303674974  | 0.000954264 | 0.031191555 |
| Beta | BCDIN3D        | 44.05033043 | 0.721756509  | 0.218484147 | 3.303473131  | 0.000954951 | 0.031191555 |
| Beta | ADM            | 238.6142296 | 1.083623281  | 0.328169889 | 3.302019224  | 0.000959915 | 0.031267311 |
| Beta | ZNF608         | 109.256821  | 1.164957494  | 0.352978956 | 3.300359621  | 0.00096561  | 0.031366411 |
| Beta | MTR            | 61.37427851 | 0.920160694  | 0.279275733 | 3.294810778  | 0.00098488  | 0.031904707 |
| Beta | TAF2           | 53.42066576 | 0.770123279  | 0.233912287 | 3.292359239  | 0.000993506 | 0.032096221 |
| Beta | RNF7           | 1072.775119 | -0.43808342  | 0.133176758 | -3.289488556 | 0.001003696 | 0.032337074 |

|      |            |             |              |             |              |             |             |
|------|------------|-------------|--------------|-------------|--------------|-------------|-------------|
| Beta | SHARPIN    | 117.3483236 | -0.643782488 | 0.195774713 | -3.28838427  | 0.001007642 | 0.032375976 |
| Beta | CCDC125    | 21.24504743 | 1.246147253  | 0.379142727 | 3.286749726  | 0.001013509 | 0.032476223 |
| Beta | TTYH3      | 9.607293053 | 1.233714521  | 0.375616851 | 3.284502594  | 0.001021626 | 0.03264784  |
| Beta | ARHGEF12   | 197.3642268 | 0.754832342  | 0.229990583 | 3.282014117  | 0.001030684 | 0.032771185 |
| Beta | CSTF3      | 83.37372519 | 0.715667903  | 0.218063786 | 3.281920011  | 0.001031028 | 0.032771185 |
| Beta | ERCC6L2    | 73.41969493 | 0.74428782   | 0.226920164 | 3.279954531  | 0.001038238 | 0.032911872 |
| Beta | MMP24      | 25.41615627 | 1.074238468  | 0.32779353  | 3.277180202  | 0.001048494 | 0.033081624 |
| Beta | AC078909.2 | 16.55374998 | 1.511830409  | 0.461397846 | 3.27663083   | 0.001050536 | 0.033081624 |
| Beta | SYT11      | 303.8026505 | 0.914959383  | 0.279271067 | 3.276241221  | 0.001051987 | 0.033081624 |
| Beta | CCDC18-AS1 | 101.5719127 | 0.828377676  | 0.252986246 | 3.274398069  | 0.001058873 | 0.033091497 |
| Beta | POLR1C     | 32.59579479 | 0.750402798  | 0.229192847 | 3.274110896  | 0.00105995  | 0.033091497 |
| Beta | SERTAD3    | 51.51609702 | 0.792842003  | 0.242169619 | 3.273911926  | 0.001060697 | 0.033091497 |
| Beta | FNDG9      | 16.06531908 | 1.920451648  | 0.587314253 | 3.269887692  | 0.001075902 | 0.033477537 |
| Beta | AC104083.1 | 14.52771722 | 1.312386475  | 0.401465095 | 3.268992722  | 0.001079311 | 0.033495461 |
| Beta | EOGT       | 26.50139842 | 0.946195543  | 0.289535082 | 3.267982371  | 0.001083171 | 0.033527265 |
| Beta | STXBP5     | 97.35032335 | 0.685957434  | 0.209986653 | 3.266671595  | 0.001088198 | 0.033581282 |
| Beta | APLP2      | 697.8568139 | 0.559772717  | 0.171391438 | 3.266048308  | 0.001090596 | 0.033581282 |
| Beta | ZNF540     | 26.57976198 | 1.301471111  | 0.398576069 | 3.265301692  | 0.001093475 | 0.033582477 |
| Beta | AMMECR1    | 26.83863565 | 0.716956234  | 0.219823663 | 3.261506174  | 0.00110822  | 0.03394107  |
| Beta | C3orf62    | 16.00103628 | 1.097796773  | 0.336662457 | 3.260823264  | 0.001110893 | 0.03394107  |
| Beta | HPCA       | 60.3854686  | -1.011014074 | 0.310331202 | -3.257855048 | 0.001122577 | 0.03400821  |
| Beta | ZNF512     | 34.30958443 | 0.929369648  | 0.285277015 | 3.257779626  | 0.001122876 | 0.03400821  |
| Beta | BCCIP      | 101.7757337 | 0.857858892  | 0.263334041 | 3.257683237  | 0.001123257 | 0.03400821  |
| Beta | LNPEP      | 111.7894835 | 0.823777063  | 0.252898282 | 3.257345422  | 0.001124595 | 0.03400821  |
| Beta | HSPB6      | 47.2089474  | -1.104430325 | 0.339183775 | -3.256141378 | 0.001129375 | 0.034065638 |
| Beta | SEC61B     | 2773.211084 | -0.68838283  | 0.211537349 | -3.254190497 | 0.00113716  | 0.034154168 |
| Beta | PUS7L      | 93.80473464 | 0.789678208  | 0.242682287 | 3.253958976  | 0.001138087 | 0.034154168 |
| Beta | INO80D     | 72.80731341 | 0.891187787  | 0.274110344 | 3.251200863  | 0.001149186 | 0.034399948 |
| Beta | CENPX      | 226.819734  | -0.699788799 | 0.215367719 | -3.249274321 | 0.001156998 | 0.03445768  |
| Beta | MYO9B      | 25.04526299 | 0.854519596  | 0.263028808 | 3.248768079  | 0.001159059 | 0.03445768  |
| Beta | IRF2BPL    | 183.3078648 | 0.788748085  | 0.242833733 | 3.248099333  | 0.001161787 | 0.03445768  |
| Beta | PDLIM1     | 389.9385619 | -0.6871712   | 0.211576722 | -3.247858246 | 0.001162772 | 0.03445768  |
| Beta | GRN        | 557.8623908 | 0.628785155  | 0.193691148 | 3.24632882   | 0.001169037 | 0.034509613 |
| Beta | CASP7      | 16.68669877 | 1.314522123  | 0.405004447 | 3.245698002  | 0.001171631 | 0.034509613 |
| Beta | SILC1      | 14.89712384 | 1.53834966   | 0.474115272 | 3.244674349  | 0.00117585  | 0.034509613 |
| Beta | RIC1       | 26.45439464 | 0.906769407  | 0.27947119  | 3.244589922  | 0.001176199 | 0.034509613 |
| Beta | SNHG29     | 4066.845861 | -0.584977691 | 0.180373711 | -3.243142745 | 0.00118219  | 0.034599531 |
| Beta | PDLIM4     | 173.0149697 | 1.074970143  | 0.331590796 | 3.241857601  | 0.001187533 | 0.034670112 |
| Beta | PES1       | 44.35174054 | 0.746802788  | 0.230490353 | 3.240060937  | 0.001195042 | 0.034803378 |
| Beta | TNFSF10    | 27.53825507 | 1.143770729  | 0.353221481 | 3.238112037  | 0.001203235 | 0.034955912 |
| Beta | MRPL30     | 64.72808471 | 0.799179838  | 0.246943235 | 3.236289666  | 0.001210944 | 0.035093641 |
| Beta | CEP350     | 152.4368489 | 0.840528969  | 0.259852587 | 3.23463768   | 0.001217972 | 0.035211    |
| Beta | TTC14      | 102.6193791 | 0.818796731  | 0.253321669 | 3.232241188  | 0.001228233 | 0.035421053 |
| Beta | ATP6VOC    | 2266.009655 | -0.346709333 | 0.107510609 | -3.224884841 | 0.001260234 | 0.036255477 |
| Beta | GNG7       | 83.6397278  | -1.049408019 | 0.326046997 | -3.218579003 | 0.001288275 | 0.036752298 |
| Beta | LINC02035  | 24.19672934 | 1.245479295  | 0.386982831 | 3.218435538  | 0.001288919 | 0.036752298 |
| Beta | SMC4       | 19.52714602 | 1.109883829  | 0.344857873 | 3.218380427  | 0.001289167 | 0.036752298 |
| Beta | ETV6       | 26.63454074 | 1.115921444  | 0.346752278 | 3.218209411  | 0.001289936 | 0.036752298 |
| Beta | VIM        | 83.81530924 | 2.286254441  | 0.710718101 | 3.216823149  | 0.001296185 | 0.036841558 |
| Beta | CBR4       | 58.97577451 | 0.854088329  | 0.266123735 | 3.209365489  | 0.001330283 | 0.037720055 |
| Beta | KCNC3      | 19.74212434 | 1.303059523  | 0.40616263  | 3.208221105  | 0.001335588 | 0.03777649  |
| Beta | AP1S2      | 81.31941077 | 0.842004304  | 0.2625062   | 3.207559679  | 0.001338663 | 0.03777649  |
| Beta | EIF4G3     | 221.5272033 | 0.661449791  | 0.206501599 | 3.203121885  | 0.001359464 | 0.038154129 |
| Beta | MTFP1      | 39.83785778 | -1.041391494 | 0.325295615 | -3.201369601 | 0.00136776  | 0.038154129 |
| Beta | RPP25      | 146.6664468 | -0.790141291 | 0.246823514 | -3.201239945 | 0.001368375 | 0.038154129 |
| Beta | VMP1       | 286.4499141 | 0.995863571  | 0.311103556 | 3.20106778   | 0.001369193 | 0.038154129 |
| Beta | RASA2      | 44.83360557 | 0.833274232  | 0.260322833 | 3.200926407  | 0.001369865 | 0.038154129 |
| Beta | RBM41      | 37.13835103 | 0.832316926  | 0.26005008  | 3.200602458  | 0.001371406 | 0.038154129 |
| Beta | KIAA2026   | 155.2682635 | 0.632905777  | 0.197944225 | 3.197394508  | 0.001386751 | 0.038490485 |
| Beta | HHEX       | 30.0097094  | 1.931924884  | 0.604776433 | 3.194444723  | 0.001401001 | 0.038538112 |
| Beta | ZNF346     | 58.50377378 | 0.782607489  | 0.244994282 | 3.194390839  | 0.001401263 | 0.038538112 |
| Beta | DUSP1      | 835.4925926 | -1.377330408 | 0.431194345 | -3.194221873 | 0.001402083 | 0.038538112 |
| Beta | VSTM2L     | 11.0527053  | 2.232248428  | 0.698944546 | 3.193741821  | 0.001404417 | 0.038538112 |
| Beta | GXYLT1     | 57.73395693 | 0.870621344  | 0.272608384 | 3.193670468  | 0.001404764 | 0.038538112 |
| Beta | CEP290     | 70.76885159 | 0.798292013  | 0.250129744 | 3.191511729  | 0.001415304 | 0.038737385 |
| Beta | SRCAP      | 49.81615719 | 0.810682513  | 0.254234765 | 3.188716195  | 0.001429061 | 0.039023598 |
| Beta | LRRCA8A    | 28.87208259 | 0.899282202  | 0.282186629 | 3.186834917  | 0.001438388 | 0.039151429 |
| Beta | GABRB3     | 322.0668118 | 0.700911413  | 0.21996708  | 3.18643778   | 0.001440365 | 0.039151429 |
| Beta | KCTD9      | 32.17349122 | 0.890972912  | 0.280151154 | 3.180329257  | 0.001471078 | 0.039812517 |
| Beta | ZFP30      | 19.34168538 | 1.170817229  | 0.368151198 | 3.180261904  | 0.00147142  | 0.039812517 |
| Beta | ZC3H14     | 213.8485686 | 0.640763945  | 0.201542641 | 3.179297158  | 0.001476327 | 0.039833267 |
| Beta | PPP3CA     | 121.4330192 | 0.749967023  | 0.2359717   | 3.178207478  | 0.001481887 | 0.039833267 |
| Beta | SACS       | 13.39815721 | 1.453789354  | 0.457611123 | 3.176910004  | 0.001488532 | 0.039833267 |

|      |                   |             |              |             |              |             |             |
|------|-------------------|-------------|--------------|-------------|--------------|-------------|-------------|
| Beta | <i>SRSF7</i>      | 267.2213601 | 0.605887336  | 0.190719422 | 3.176851786  | 0.001488831 | 0.039833267 |
| Beta | <i>TBL1XR1</i>    | 214.9653586 | 0.826921205  | 0.260299003 | 3.176812808  | 0.001489031 | 0.039833267 |
| Beta | <i>CS</i>         | 86.73319986 | 0.652772634  | 0.205749129 | 3.172662929  | 0.001510478 | 0.040315778 |
| Beta | <i>RNF214</i>     | 52.88653709 | 0.670409873  | 0.211438114 | 3.170714407  | 0.001520646 | 0.040456093 |
| Beta | <i>RPL7L1</i>     | 401.7870338 | 0.36195578   | 0.114169192 | 3.170345476  | 0.001522578 | 0.040456093 |
| Beta | <i>XIAP</i>       | 316.5016576 | 0.671841197  | 0.211964683 | 3.169590274  | 0.00152654  | 0.040470432 |
| Beta | <i>GUCY1A1</i>    | 71.74546489 | 0.644476572  | 0.20350553  | 3.166874987  | 0.001540865 | 0.040744674 |
| Beta | <i>NCOA6</i>      | 82.72095904 | 0.838765197  | 0.264901715 | 3.166326037  | 0.001543777 | 0.040744674 |
| Beta | <i>HDAC7</i>      | 23.38768281 | 1.025123744  | 0.323956245 | 3.164389511  | 0.001554087 | 0.040925433 |
| Beta | <i>ZNF84</i>      | 69.87692516 | 0.700372303  | 0.221615199 | 3.160308071  | 0.001576024 | 0.041410907 |
| Beta | <i>MAGI3</i>      | 23.10440032 | 0.845938533  | 0.267748807 | 3.159448368  | 0.001580681 | 0.041441181 |
| Beta | <i>FOXP2</i>      | 100.3652979 | 1.001553537  | 0.317103411 | 3.158444538  | 0.001586135 | 0.041492165 |
| Beta | <i>CHD6</i>       | 131.4531485 | 0.527954014  | 0.167419979 | 3.153470792  | 0.001613414 | 0.042070199 |
| Beta | <i>ZER1</i>       | 87.16689728 | 0.778558498  | 0.24700054  | 3.152051802  | 0.001621275 | 0.042070199 |
| Beta | <i>SLC7A11</i>    | 21.03556793 | 1.735900039  | 0.550834522 | 3.151400226  | 0.001624897 | 0.042070199 |
| Beta | <i>PIAS4</i>      | 63.69979944 | 0.760181501  | 0.24122453  | 3.151344106  | 0.001625209 | 0.042070199 |
| Beta | <i>RAD50</i>      | 180.5956739 | 0.657765377  | 0.208735014 | 3.151198083  | 0.001626022 | 0.042070199 |
| Beta | <i>ZNF830</i>     | 60.69263773 | 0.689249628  | 0.218814675 | 3.149924146  | 0.001633129 | 0.042161818 |
| Beta | <i>EDIL3</i>      | 153.4190253 | 0.821372484  | 0.260921103 | 3.147972601  | 0.001644071 | 0.042351843 |
| Beta | <i>RACK1</i>      | 5882.617694 | -0.438719293 | 0.139455849 | -3.145936835 | 0.001655558 | 0.042473058 |
| Beta | <i>PISD</i>       | 50.48651774 | 0.680930433  | 0.216452486 | 3.145865614  | 0.001655961 | 0.042473058 |
| Beta | <i>DCAF5</i>      | 115.6932816 | 0.569049348  | 0.180946263 | 3.144852728  | 0.001661705 | 0.042483829 |
| Beta | <i>TEP1</i>       | 16.43118411 | 1.055617456  | 0.335700126 | 3.144525048  | 0.001663567 | 0.042483829 |
| Beta | <i>E2F5</i>       | 27.96797864 | 0.862761041  | 0.274483373 | 3.143217863  | 0.001671014 | 0.042582051 |
| Beta | <i>PGM2</i>       | 12.13209927 | 1.163817317  | 0.370401962 | 3.142038751  | 0.001677758 | 0.042594747 |
| Beta | <i>ARHGAP5</i>    | 414.0679059 | 0.715634155  | 0.227773213 | 3.141871458  | 0.001678717 | 0.042594747 |
| Beta | <i>MUC12</i>      | 117.1716332 | -1.839693835 | 0.585828063 | -3.140330673 | 0.001687572 | 0.04271095  |
| Beta | <i>HDAC4-AS1</i>  | 43.22187651 | 1.253529377  | 0.39930936  | 3.139243662  | 0.001693845 | 0.04271095  |
| Beta | <i>ELP3</i>       | 32.37471633 | 0.697814701  | 0.222291054 | 3.13919381   | 0.001694134 | 0.04271095  |
| Beta | <i>RG52</i>       | 135.7037429 | 1.121399606  | 0.357391057 | 3.137738294  | 0.001702568 | 0.042832268 |
| Beta | <i>GPM6B</i>      | 24.03166461 | 0.99661908   | 0.317965056 | 3.13436669   | 0.001722255 | 0.043222384 |
| Beta | <i>SYNE2</i>      | 296.2823901 | 0.865048959  | 0.276035375 | 3.133833699  | 0.001725386 | 0.043222384 |
| Beta | <i>ARID4B</i>     | 270.2872568 | 0.593075818  | 0.189293379 | 3.13310386   | 0.001729682 | 0.0432384   |
| Beta | <i>LAMP2</i>      | 422.7586087 | 0.503269074  | 0.160764505 | 3.130473822  | 0.001745246 | 0.043535408 |
| Beta | <i>NEGR1</i>      | 72.26680704 | 0.944314454  | 0.302013646 | 3.126727772  | 0.001767635 | 0.043914056 |
| Beta | <i>STAG1</i>      | 91.98637429 | 0.76151677   | 0.243560654 | 3.126600116  | 0.001768403 | 0.043914056 |
| Beta | <i>PBX1</i>       | 166.0969824 | 0.757488259  | 0.242312927 | 3.126074493  | 0.001771567 | 0.043914056 |
| Beta | <i>TNRC6C</i>     | 70.61492999 | 1.099687899  | 0.351923708 | 3.124790613  | 0.001779317 | 0.04393861  |
| Beta | <i>C9orf85</i>    | 55.54151944 | 0.645032513  | 0.206493329 | 3.123745037  | 0.001785651 | 0.04393861  |
| Beta | <i>DPEP1</i>      | 7.561981199 | 1.881840189  | 0.6024387   | 3.12370402   | 0.0017859   | 0.04393861  |
| Beta | <i>LRRTM3</i>     | 61.17815119 | -0.974378265 | 0.311955432 | -3.123453434 | 0.001787421 | 0.04393861  |
| Beta | <i>AC051619.5</i> | 42.22015282 | 1.215506237  | 0.389459326 | 3.121009454  | 0.001802322 | 0.0441615   |
| Beta | <i>FHDC1</i>      | 16.89983647 | 1.211583718  | 0.388235751 | 3.120742266  | 0.001803958 | 0.0441615   |
| Beta | <i>BAZ2A</i>      | 245.3769141 | 0.664305875  | 0.212922989 | 3.119934953  | 0.00180891  | 0.044191218 |
| Beta | <i>SGMS2</i>      | 210.5728232 | -0.763054447 | 0.244687438 | -3.118486394 | 0.001817825 | 0.044239678 |
| Beta | <i>PMVK</i>       | 455.8406326 | -0.543209565 | 0.174195237 | -3.11839506  | 0.001818389 | 0.044239678 |
| Beta | <i>SMARCC2</i>    | 111.2019714 | 0.632240171  | 0.20279113  | 3.117691445  | 0.001822735 | 0.044239678 |
| Beta | <i>ACIN1</i>      | 111.1188557 | 0.801603551  | 0.257156099 | 3.117186618  | 0.00182586  | 0.044239678 |
| Beta | <i>PTK2B</i>      | 18.62823237 | 1.001019983  | 0.32125258  | 3.115990486  | 0.001833282 | 0.044328681 |
| Beta | <i>VCPIP1</i>     | 59.45890692 | 0.696666942  | 0.223712489 | 3.114117344  | 0.001844961 | 0.044520038 |
| Beta | <i>C17orf80</i>   | 30.57210881 | 0.98440435   | 0.316227313 | 3.112964343  | 0.001852184 | 0.04453636  |
| Beta | <i>TXNL4A</i>     | 761.6069786 | -0.484389275 | 0.155611719 | -3.112807166 | 0.001853171 | 0.04453636  |
| Beta | <i>AC048341.2</i> | 8.687314368 | 1.479564778  | 0.475477219 | 3.111746931  | 0.001859839 | 0.044605946 |
| Beta | <i>MSI2</i>       | 338.2277187 | 0.754945102  | 0.24271257  | 3.110449127  | 0.001868031 | 0.044703955 |
| Beta | <i>CYB561D1</i>   | 42.18997887 | 0.903646245  | 0.290570537 | 3.109903206  | 0.001871487 | 0.044703955 |
| Beta | <i>FBXW7</i>      | 155.8943381 | 0.622926302  | 0.200385455 | 3.108640305  | 0.001879504 | 0.044753746 |
| Beta | <i>ZC3H8</i>      | 90.28467238 | 0.648350125  | 0.208581157 | 3.108383011  | 0.001881141 | 0.044753746 |
| Beta | <i>HMGCB1</i>     | 1916.700067 | 0.475454709  | 0.153031679 | 3.106903819  | 0.001890579 | 0.04481672  |
| Beta | <i>GLE1</i>       | 24.25702107 | 0.808993246  | 0.260396022 | 3.106780356  | 0.001891369 | 0.04481672  |
| Beta | <i>LACC1</i>      | 24.79530447 | 1.115862307  | 0.359405406 | 3.104745474  | 0.001904428 | 0.04503592  |
| Beta | <i>CTSO</i>       | 31.02332571 | 0.924143943  | 0.297787987 | 3.103362065  | 0.001913354 | 0.045119096 |
| Beta | <i>CA11</i>       | 152.4308594 | 1.093366209  | 0.352355697 | 3.103018398  | 0.001915577 | 0.045119096 |
| Beta | <i>UFL1</i>       | 270.4389146 | 0.607544361  | 0.195842947 | 3.102201896  | 0.001920869 | 0.045153788 |
| Beta | <i>MBD6</i>       | 86.51055697 | 0.677897852  | 0.21862439  | 3.100742112  | 0.001930363 | 0.045286936 |
| Beta | <i>SAMD9</i>      | 21.18201908 | 1.014740891  | 0.327342575 | 3.099935563  | 0.001935627 | 0.045320513 |
| Beta | <i>DDC</i>        | 37.86585087 | -1.169172807 | 0.377252735 | -3.099176493 | 0.001940594 | 0.045346998 |
| Beta | <i>RAB30-DT</i>   | 94.71648669 | 0.752313097  | 0.242831025 | 3.098092987  | 0.001947703 | 0.04536006  |
| Beta | <i>TSC22D2</i>    | 76.7391221  | 0.75277547   | 0.242999658 | 3.097845804  | 0.001949328 | 0.04536006  |
| Beta | <i>TRIM25</i>     | 25.6686991  | 0.916649864  | 0.295947502 | 3.097339419  | 0.001952662 | 0.04536006  |
| Beta | <i>SEZ6</i>       | 36.29608996 | 1.073401364  | 0.346837316 | 3.094826635  | 0.00196928  | 0.045656398 |
| Beta | <i>CYYR1</i>      | 83.65471347 | -1.075276623 | 0.347728522 | -3.092287673 | 0.001986203 | 0.045958631 |
| Beta | <i>OFD1</i>       | 114.7800694 | 0.505446087  | 0.163566877 | 3.090149402  | 0.002000558 | 0.046049813 |
| Beta | <i>PLK2</i>       | 113.3366763 | 1.09358421   | 0.35398743  | 3.089330629  | 0.002006081 | 0.046049813 |



|      |            |             |              |             |              |             |             |
|------|------------|-------------|--------------|-------------|--------------|-------------|-------------|
| Beta | INS        | 3186516.377 | -1.635685242 | 0.529518995 | -3.089002014 | 0.002008301 | 0.046049813 |
| Beta | LUCAT1     | 45.02161994 | 1.843039487  | 0.59664748  | 3.088992327  | 0.002008366 | 0.046049813 |
| Beta | TAF5L      | 29.76698382 | 0.758143653  | 0.245535485 | 3.087715217  | 0.002017017 | 0.046049813 |
| Beta | KCNC4      | 12.00463633 | 1.577221681  | 0.510819974 | 3.087627267  | 0.002017614 | 0.046049813 |
| Beta | HRK        | 158.4703468 | -1.287729074 | 0.41714612  | -3.086997603 | 0.002021892 | 0.046049813 |
| Beta | NPNT       | 23.67385925 | 1.942624879  | 0.629310185 | 3.08691155   | 0.002022478 | 0.046049813 |
| Beta | JAM3       | 77.4562269  | 0.64967609   | 0.210488732 | 3.086512438  | 0.002025195 | 0.046049813 |
| Beta | MAGI1      | 72.06936743 | 0.84852593   | 0.275104027 | 3.084382078  | 0.002039755 | 0.046291857 |
| Beta | SMG5       | 48.64694959 | 0.847310808  | 0.274841116 | 3.082911389  | 0.002049862 | 0.046432119 |
| Beta | VWA5A      | 119.3375186 | 0.663050361  | 0.215391027 | 3.07835646   | 0.002081458 | 0.047057661 |
| Beta | NSRP1      | 420.6491215 | 0.554341942  | 0.180116759 | 3.077681091  | 0.00208618  | 0.047074422 |
| Beta | C1QBP      | 782.6269955 | -0.560859    | 0.182327845 | -3.076101726 | 0.002097263 | 0.047234353 |
| Beta | NCOA5      | 40.39389207 | 0.850687146  | 0.276714441 | 3.074241965  | 0.002110382 | 0.047374298 |
| Beta | NELFE      | 320.452524  | 0.500152968  | 0.162715683 | 3.073784654  | 0.002113619 | 0.047374298 |
| Beta | CTCF       | 123.7714658 | 0.644544727  | 0.209708987 | 3.073519814  | 0.002115496 | 0.047374298 |
| Beta | MAPK7      | 16.82472662 | 0.900742026  | 0.2933339   | 3.070705522  | 0.002135537 | 0.047481796 |
| Beta | ESRRG      | 14.24529471 | 1.202927253  | 0.391754908 | 3.070611823  | 0.002136207 | 0.047481796 |
| Beta | MT1E       | 1002.424635 | -1.967238601 | 0.640908396 | -3.069453626 | 0.002144507 | 0.047481796 |
| Beta | BCOR       | 84.5836613  | 0.830663269  | 0.270649631 | 3.069146133  | 0.002146716 | 0.047481796 |
| Beta | ZZEF1      | 114.3729378 | 0.73096668   | 0.238168439 | 3.069116475  | 0.002146929 | 0.047481796 |
| Beta | GLRX       | 41.6526643  | 1.175480015  | 0.38301895  | 3.068986569  | 0.002147862 | 0.047481796 |
| Beta | FAM174A    | 459.7357342 | -0.594696294 | 0.193793325 | -3.068714026 | 0.002149823 | 0.047481796 |
| Beta | INHBA      | 204.8327382 | 1.71450434   | 0.558826871 | 3.068042055  | 0.002154663 | 0.047481796 |
| Beta | GABPA      | 37.73150673 | 0.823586254  | 0.268461875 | 3.06779595   | 0.002156438 | 0.047481796 |
| Beta | RNF111     | 56.60898976 | 0.860877712  | 0.280729324 | 3.066575657  | 0.00216526  | 0.047587425 |
| Beta | C2orf49    | 97.4494348  | 0.901262327  | 0.293969782 | 3.065833238  | 0.002170643 | 0.047617232 |
| Beta | OSTC       | 936.5300619 | -0.586460012 | 0.191346854 | -3.064905431 | 0.002177388 | 0.047658343 |
| Beta | RIC8B      | 28.18440509 | 0.799177511  | 0.260807888 | 3.064238268  | 0.00218225  | 0.047658343 |
| Beta | ZNF793     | 36.8188069  | 0.804833367  | 0.262711506 | 3.063563448  | 0.002187178 | 0.047658343 |
| Beta | ESCO1      | 129.0573527 | 0.627562215  | 0.20486051  | 3.063363531  | 0.00218864  | 0.047658343 |
| Beta | TUBD1      | 31.27983519 | 1.321078522  | 0.431423949 | 3.062135339  | 0.002197641 | 0.047766366 |
| Beta | CDC37L1-DT | 40.05146501 | 1.007053096  | 0.329168984 | 3.059380272  | 0.002217954 | 0.047987494 |
| Beta | ACO05670.3 | 62.58766077 | 0.777005305  | 0.253981412 | 3.059299883  | 0.00221855  | 0.047987494 |
| Beta | NUP62      | 69.37602868 | 0.620701738  | 0.202904388 | 3.059084849  | 0.002220143 | 0.047987494 |
| Beta | CAMK2D     | 167.3093519 | 0.592273373  | 0.193645427 | 3.05854562   | 0.002224142 | 0.047987494 |
| Beta | PPP3CB-AS1 | 12.04074453 | 0.925475741  | 0.302643236 | 3.057975959  | 0.002228375 | 0.047987494 |
| Beta | RAI1       | 48.58371541 | 0.872545946  | 0.285382005 | 3.057466587  | 0.002232165 | 0.047987494 |
| Beta | DENND4A    | 124.6695396 | 0.755780551  | 0.247425884 | 3.054573516  | 0.002253808 | 0.048329938 |
| Beta | CEP162     | 27.42621884 | 0.83278413   | 0.272664383 | 3.054246102  | 0.002256269 | 0.048329938 |
| Beta | NUFIP2     | 233.1846766 | 0.753651132  | 0.246853868 | 3.053025413  | 0.002265468 | 0.048344412 |
| Beta | SRSF1      | 183.1676919 | 0.612685187  | 0.200699581 | 3.052747704  | 0.002267565 | 0.048344412 |
| Beta | TMEM192    | 136.8856493 | 0.600297619  | 0.196673387 | 3.05225648   | 0.002271279 | 0.048344412 |
| Beta | EDEM2      | 92.75278208 | 0.561836574  | 0.184102379 | 3.051761615  | 0.002275027 | 0.048344412 |
| Beta | S100PBP    | 57.30647349 | 1.106572768  | 0.362638317 | 3.051450213  | 0.002277388 | 0.048344412 |
| Beta | SETMAR     | 11.80264491 | 1.123370117  | 0.368256403 | 3.050510751  | 0.002284525 | 0.048370962 |
| Beta | PSAP       | 1711.776524 | 0.469740324  | 0.154020104 | 3.049863702  | 0.002289452 | 0.048370962 |
| Beta | KLHL35     | 33.13161448 | -0.926585795 | 0.303831263 | -3.049672331 | 0.002290912 | 0.048370962 |
| Beta | ECEL1      | 30.42135874 | 2.016942729  | 0.661545806 | 3.048833066  | 0.002297321 | 0.048375956 |
| Beta | GEMIN7     | 46.14972352 | -0.724704167 | 0.237719352 | -3.04857034  | 0.002299331 | 0.048375956 |
| Beta | TRAF6      | 35.18584946 | 0.783125899  | 0.256997848 | 3.047208005  | 0.002309778 | 0.048509444 |
| Beta | SEC31B     | 9.898719659 | 1.121698435  | 0.368210891 | 3.046347795  | 0.002316397 | 0.0485622   |
| Beta | FAM229B    | 532.7656357 | -0.730233851 | 0.239766238 | -3.045607488 | 0.002322108 | 0.048595753 |
| Beta | ZC3H4      | 27.49659948 | 1.070776117  | 0.351666243 | 3.044864662  | 0.00232785  | 0.048629863 |
| Beta | GRAMD1B    | 15.23756584 | 1.258975645  | 0.413749713 | 3.042843553  | 0.002343541 | 0.048871311 |
| Beta | RIPPLY2    | 66.73652985 | 0.94047206   | 0.309252428 | 3.041114558  | 0.002357041 | 0.049066297 |
| Beta | IWS1       | 75.29824153 | 0.582551161  | 0.191617573 | 3.040176074  | 0.002364399 | 0.049132955 |
| Beta | ZBTB38     | 216.2974931 | 0.64957766   | 0.213746671 | 3.039007144  | 0.002373592 | 0.049237465 |
| Beta | PRPF40A    | 471.8525475 | 0.442088307  | 0.145601675 | 3.03628587   | 0.002395122 | 0.04954712  |
| Beta | LINC00623  | 176.6384907 | 0.46719372   | 0.153894849 | 3.035798298  | 0.002398998 | 0.04954712  |
| Beta | SECISBP2   | 132.6931264 | 0.600812983  | 0.197926534 | 3.03553532   | 0.002401091 | 0.04954712  |
| Beta | ABCA1      | 73.1923053  | 1.519904576  | 0.501854688 | 3.028575032  | 0.002457101 | 0.050581061 |
| Beta | ACO07566.1 | 32.52185135 | 1.103572953  | 0.364426079 | 3.028249119  | 0.002459752 | 0.050581061 |
| Beta | METTL18    | 24.64405701 | 0.827658862  | 0.273444011 | 3.026794621  | 0.002471618 | 0.050664383 |
| Beta | ULK1       | 114.0078646 | 1.010508194  | 0.333909005 | 3.026298121  | 0.002475681 | 0.050664383 |
| Beta | FAM168A    | 31.36378942 | 0.91248489   | 0.301530405 | 3.026178708  | 0.002476659 | 0.050664383 |
| Beta | TSPAN2     | 228.2190208 | -0.683686734 | 0.226075427 | -3.024153234 | 0.002493301 | 0.050916741 |
| Beta | ALFTH      | 210.1325998 | 0.641855701  | 0.2123372   | 3.022813243  | 0.002504367 | 0.050966586 |
| Beta | RALGAPA2   | 56.22442325 | 0.692506702  | 0.229107053 | 3.022633705  | 0.002505854 | 0.050966586 |
| Beta | HSPH1      | 265.7453743 | -1.515701822 | 0.501507187 | -3.022293322 | 0.002508673 | 0.050966586 |
| Beta | POLR2A     | 181.7548888 | 0.624113657  | 0.206546354 | 3.021663879  | 0.002513895 | 0.050985072 |
| Beta | ZNF226     | 197.1310125 | 0.691890492  | 0.229070665 | 3.020423818  | 0.002524212 | 0.051106648 |
| Beta | BRD2       | 335.9100821 | 0.571696915  | 0.189667505 | 3.014205917  | 0.002576529 | 0.052076709 |
| Beta | ZNF773     | 28.72059552 | 0.836520638  | 0.277628469 | 3.013093867  | 0.002585989 | 0.05217873  |

|      |           |             |              |             |              |             |             |
|------|-----------|-------------|--------------|-------------|--------------|-------------|-------------|
| Beta | FAU       | 7973.626071 | -0.370862459 | 0.12312588  | -3.012059358 | 0.002594819 | 0.05226769  |
| Beta | VRK2      | 62.94336371 | 0.992055164  | 0.329423146 | 3.011491989  | 0.002599673 | 0.05227641  |
| Beta | GRIN2A    | 30.13972048 | 1.199009062  | 0.398228715 | 3.010855363  | 0.002605129 | 0.052297193 |
| Beta | ZNF507    | 72.08180713 | 0.699576986  | 0.232393742 | 3.010309058  | 0.00260982  | 0.052302559 |
| Beta | SIPA1L1   | 101.5622843 | 0.782049947  | 0.259951668 | 3.008443661  | 0.002625895 | 0.052357851 |
| Beta | EXTL3     | 42.74960379 | 0.989116379  | 0.328825929 | 3.008024284  | 0.002629521 | 0.052357851 |
| Beta | C6orf47   | 85.21368371 | -0.566716169 | 0.188419318 | -3.007739197 | 0.002631989 | 0.052357851 |
| Beta | DFFA      | 72.92671556 | 0.634775211  | 0.211060845 | 3.007546058  | 0.002633662 | 0.052357851 |
| Beta | GNB5      | 91.62158793 | 0.468431814  | 0.155803179 | 3.006561347  | 0.002642207 | 0.052357851 |
| Beta | TAF9      | 549.3273096 | -0.655425067 | 0.218015151 | -3.00632806  | 0.002644235 | 0.052357851 |
| Beta | TDRD9     | 123.6577097 | -1.679000451 | 0.558490311 | -3.006319746 | 0.002644308 | 0.052357851 |
| Beta | CLK2      | 20.3971831  | 0.841805152  | 0.280068698 | 3.00570952   | 0.00264962  | 0.052357851 |
| Beta | POP7      | 364.2655916 | -0.458317458 | 0.152499652 | -3.005367236 | 0.002652604 | 0.052357851 |
| Beta | THAP6     | 52.97842069 | 0.824389997  | 0.274350424 | 3.004879616  | 0.00265686  | 0.052357851 |
| Beta | ADAM15    | 34.62444865 | 0.829596938  | 0.276251496 | 3.003049577  | 0.002672889 | 0.052570576 |
| Beta | IGSF1     | 52.64856541 | 0.829791031  | 0.276354428 | 3.002633379  | 0.002676547 | 0.052570576 |
| Beta | FBXO38    | 36.82630327 | 0.835663469  | 0.278611366 | 2.999387572  | 0.002705229 | 0.053027412 |
| Beta | TUBA1A    | 3231.597356 | -0.949246186 | 0.316522114 | -2.998988521 | 0.002708775 | 0.053027412 |
| Beta | KIAA1324L | 21.36520197 | 1.001379374  | 0.333962503 | 2.998478466  | 0.002713313 | 0.053028457 |
| Beta | ASB4      | 12.68411745 | 1.252223435  | 0.417748811 | 2.997551164  | 0.002721582 | 0.053079643 |
| Beta | BAZ2B     | 273.5370386 | 0.687749493  | 0.229465639 | 2.997178554  | 0.002724911 | 0.053079643 |
| Beta | TTBK2     | 91.78211639 | 0.874805725  | 0.29193152  | 2.996612784  | 0.002729972 | 0.053090778 |
| Beta | DVL3      | 110.701811  | 0.614157625  | 0.205096457 | 2.994481889  | 0.002749114 | 0.05337524  |
| Beta | ZNF621    | 39.95050215 | 0.763523406  | 0.255079209 | 2.993279656  | 0.002759967 | 0.053498119 |
| Beta | ZBTB49    | 8.053014611 | 1.033605818  | 0.345397775 | 2.992508615  | 0.002766949 | 0.053545663 |
| Beta | NBDY      | 625.6938157 | -0.582478129 | 0.194838907 | -2.989537037 | 0.002794006 | 0.053980921 |
| Beta | KCNJ6     | 175.6681508 | 0.835902827  | 0.279807351 | 2.987422684  | 0.002813404 | 0.05413742  |
| Beta | ITGAV     | 153.7960332 | 0.622228202  | 0.208286938 | 2.987360648  | 0.002813975 | 0.05413742  |
| Beta | MTHFR     | 72.1082817  | 0.825055818  | 0.276200933 | 2.987157973  | 0.002815842 | 0.05413742  |
| Beta | PLPBP     | 124.0211027 | 0.517386171  | 0.173252722 | 2.986309042  | 0.002823671 | 0.05419982  |
| Beta | SASH1     | 16.37352742 | 1.35338523   | 0.453351887 | 2.985286414  | 0.002833129 | 0.054293223 |
| Beta | PUDP      | 7.714809217 | 1.291919098  | 0.432973784 | 2.983827532  | 0.002846672 | 0.054464478 |
| Beta | MCUB      | 250.027889  | -0.538126527 | 0.180420731 | -2.982620257 | 0.002857923 | 0.054591417 |
| Beta | UBA6-AS1  | 27.11478896 | 0.826576799  | 0.277208956 | 2.98178245   | 0.002865756 | 0.054652733 |
| Beta | CYB5A     | 392.7297656 | -0.722548688 | 0.242386632 | -2.980975812 | 0.002873315 | 0.054708655 |
| Beta | KBTBD2    | 70.38814414 | 0.788441493  | 0.264665507 | 2.979011141  | 0.002891803 | 0.054824092 |
| Beta | MARF1     | 74.08985359 | 0.891595677  | 0.299302245 | 2.978914095  | 0.002892719 | 0.054824092 |
| Beta | POCS      | 33.20392368 | 0.683126883  | 0.229325413 | 2.978853828  | 0.002893288 | 0.054824092 |
| Beta | ZNF431    | 102.1221595 | 0.63569052   | 0.213513046 | 2.97729123   | 0.002908076 | 0.054998738 |
| Beta | QKI       | 57.53536438 | 0.590252279  | 0.19827762  | 2.976898141  | 0.002911807 | 0.054998738 |
| Beta | BAZ1A     | 66.61287865 | 0.964968536  | 0.324216623 | 2.976308024  | 0.002917417 | 0.055016803 |
| Beta | GAB2      | 55.0892919  | 0.875795416  | 0.294398223 | 2.974866517  | 0.002931161 | 0.055187967 |
| Beta | PHC1      | 42.22873122 | 0.601842794  | 0.202411136 | 2.973368003  | 0.002945511 | 0.055337101 |
| Beta | TCF4      | 192.9058977 | 0.800427114  | 0.269226444 | 2.973062758  | 0.002948442 | 0.055337101 |
| Beta | PRKACB    | 181.2849443 | 0.759394675  | 0.255480551 | 2.97241677   | 0.002954653 | 0.055365797 |
| Beta | KCNJ3     | 16.20119289 | 1.79164597   | 0.603064361 | 2.970903418  | 0.002969251 | 0.055510763 |
| Beta | ARL14EP   | 170.2670902 | 0.505604581  | 0.170213579 | 2.970412731  | 0.002973999 | 0.055510763 |
| Beta | RAB8B     | 43.12447091 | 1.009536111  | 0.339931232 | 2.969824533  | 0.002979699 | 0.055510763 |
| Beta | MCRIP2    | 343.4967487 | -0.524357641 | 0.176587964 | -2.969384949 | 0.002983965 | 0.055510763 |
| Beta | SMIM6     | 241.1652421 | -1.037700934 | 0.349511058 | -2.969007449 | 0.002987634 | 0.055510763 |
| Beta | SLC48A1   | 41.24113091 | 0.767726051  | 0.258644039 | 2.96827274   | 0.002994785 | 0.055510763 |
| Beta | AK9       | 43.19820965 | 0.688231791  | 0.231908205 | 2.967690555  | 0.003000462 | 0.055510763 |
| Beta | TSHZ2     | 134.524303  | 0.873360186  | 0.29431466  | 2.967436917  | 0.003002939 | 0.055510763 |
| Beta | STAMBP    | 91.56794323 | 0.669791023  | 0.225726911 | 2.967262603  | 0.003004642 | 0.055510763 |
| Beta | NAV1      | 97.19417782 | 0.779241968  | 0.262747255 | 2.965747324  | 0.003019485 | 0.05563589  |
| Beta | PIK3CA    | 60.59401269 | 0.735783616  | 0.248124496 | 2.965380801  | 0.003023085 | 0.05563589  |
| Beta | PHLPP2    | 46.62482739 | 0.7933617    | 0.267563704 | 2.965131992  | 0.003025531 | 0.05563589  |
| Beta | C19orf18  | 13.07069004 | 1.171175545  | 0.395182615 | 2.963631248  | 0.003040324 | 0.0558211   |
| Beta | GALNT10   | 40.81639379 | 1.247200941  | 0.421043912 | 2.962163579  | 0.003054854 | 0.056000928 |
| Beta | PET100    | 716.2588027 | 0.595772116  | 0.201201584 | 2.961070696  | 0.003065716 | 0.05603362  |
| Beta | TIFA      | 37.51727601 | -0.865646936 | 0.292370911 | -2.960783385 | 0.003068577 | 0.05603362  |
| Beta | HMBOX1    | 37.37307139 | 0.803716092  | 0.271516838 | 2.960096687  | 0.003075425 | 0.05603362  |
| Beta | TRNP1     | 106.2761058 | -0.814044397 | 0.275007585 | -2.9600798   | 0.003075594 | 0.05603362  |
| Beta | TIAP1     | 30.87159603 | 0.956802694  | 0.323297156 | 2.959514723  | 0.00308124  | 0.056050122 |
| Beta | SPATA5L1  | 11.69405869 | 0.919347432  | 0.310842174 | 2.95760199   | 0.003100422 | 0.056288374 |
| Beta | NPAS3     | 27.37170912 | 0.944645083  | 0.319451574 | 2.957083829  | 0.003105637 | 0.056288374 |
| Beta | PLAG1     | 46.43352453 | 0.900734972  | 0.304632934 | 2.956787894  | 0.003108619 | 0.056288374 |
| Beta | ZNF740    | 19.82554009 | 0.979488581  | 0.331366348 | 2.955908426  | 0.003117496 | 0.056362809 |
| Beta | RNF43     | 30.85776963 | 0.889644904  | 0.301101655 | 2.954633055  | 0.003130411 | 0.056415019 |
| Beta | ZCCHC10   | 136.1582144 | 0.594214743  | 0.201152185 | 2.954055619  | 0.003136275 | 0.056415019 |
| Beta | ZNF618    | 33.61004072 | 0.968348131  | 0.327815142 | 2.953945703  | 0.003137392 | 0.056415019 |
| Beta | TJP2      | 26.7401623  | 1.512379551  | 0.512021643 | 2.953741452  | 0.003139469 | 0.056415019 |
| Beta | PAX6      | 618.8422731 | 0.714336243  | 0.241973601 | 2.952124698  | 0.003155955 | 0.056625199 |

|      |            |             |              |             |              |             |             |
|------|------------|-------------|--------------|-------------|--------------|-------------|-------------|
| Beta | CHD4       | 263.1989634 | 0.720125557  | 0.244262138 | 2.948166931  | 0.003196644 | 0.057198254 |
| Beta | FAM214A    | 130.4229491 | 0.761362126  | 0.258257155 | 2.948077574  | 0.003197568 | 0.057198254 |
| Beta | ABCB10     | 18.83960457 | 1.098871508  | 0.372876046 | 2.947015553  | 0.003208571 | 0.057308368 |
| Beta | AAMP       | 152.5615878 | 0.559268472  | 0.189856039 | 2.945750233  | 0.003221724 | 0.057456514 |
| Beta | ZC3H10     | 19.94971513 | 0.974594048  | 0.3309013   | 2.945271136  | 0.003226718 | 0.0574589   |
| Beta | CDON       | 18.30325387 | 0.962913477  | 0.326989023 | 2.944788385  | 0.003231756 | 0.057462082 |
| Beta | ACO15871.1 | 36.93954764 | -1.14667659  | 0.389628805 | -2.942997476 | 0.003250511 | 0.057708766 |
| Beta | IGSF10     | 14.41636629 | 1.475647596  | 0.50152239  | 2.942336426  | 0.003257458 | 0.057745407 |
| Beta | PROX1      | 108.814997  | 0.680222723  | 0.231269646 | 2.941253794  | 0.003268866 | 0.057860883 |
| Beta | SCAI       | 45.35960418 | 0.741403453  | 0.252202122 | 2.939719326  | 0.003285097 | 0.057868119 |
| Beta | ARSA       | 102.5024135 | 0.688376215  | 0.234180411 | 2.939512367  | 0.003287292 | 0.057868119 |
| Beta | KLF3       | 115.0948978 | 0.708490804  | 0.241025702 | 2.939482378  | 0.00328761  | 0.057868119 |
| Beta | WDR82      | 165.8992514 | 0.562910161  | 0.191514918 | 2.939249675  | 0.003290079 | 0.057868119 |
| Beta | HTATSF1    | 219.4360468 | 0.617543944  | 0.21013091  | 2.938853417  | 0.003294288 | 0.057868119 |
| Beta | TMEM130    | 22.77952299 | 1.156313804  | 0.393512244 | 2.938444284  | 0.003298639 | 0.057868119 |
| Beta | PRIMPOL    | 30.38025161 | 0.762160913  | 0.259490705 | 2.937141475  | 0.003312529 | 0.058025702 |
| Beta | PHF23      | 30.97097155 | 0.969161947  | 0.330091925 | 2.936036524  | 0.003324352 | 0.05808645  |
| Beta | STX17      | 120.2108205 | 0.706450889  | 0.240676529 | 2.935271218  | 0.003332563 | 0.05808645  |
| Beta | QTRT2      | 35.60431215 | 0.687476546  | 0.234217646 | 2.935203887  | 0.003333286 | 0.05808645  |
| Beta | SMCR5      | 27.11579533 | 1.508479982  | 0.513965299 | 2.934984103  | 0.003335648 | 0.05808645  |
| Beta | LMCD1      | 68.44480567 | 0.926544417  | 0.315788673 | 2.934064765  | 0.003345544 | 0.058173105 |
| Beta | WDFY3      | 76.65287045 | 0.667266599  | 0.227605628 | 2.931678814  | 0.003371352 | 0.058466695 |
| Beta | NUP107     | 43.93156855 | 0.808140052  | 0.275849276 | 2.929643551  | 0.00339351  | 0.058466695 |
| Beta | STAT4      | 11.20612197 | 1.132769564  | 0.386711256 | 2.929238668  | 0.003397934 | 0.058466695 |
| Beta | JADE2      | 47.06896076 | 0.819916961  | 0.27995551  | 2.928740213  | 0.003403387 | 0.058466695 |
| Beta | MASTL      | 25.44909361 | 0.857323849  | 0.292751552 | 2.928503172  | 0.003405984 | 0.058466695 |
| Beta | CCND3      | 199.6244519 | -0.666462685 | 0.227612604 | -2.928057032 | 0.003410875 | 0.058466695 |
| Beta | PHACTR4    | 157.4344643 | 0.845320058  | 0.288716477 | 2.92785527   | 0.003413089 | 0.058466695 |
| Beta | FND3B      | 140.5740771 | 0.721530305  | 0.246449055 | 2.927705712  | 0.003414731 | 0.058466695 |
| Beta | KANSL3     | 26.75139287 | 0.787130035  | 0.268892848 | 2.927300001  | 0.003419189 | 0.058466695 |
| Beta | BRD3       | 124.8601441 | 0.709192638  | 0.24231207  | 2.92677388   | 0.003424978 | 0.058466695 |
| Beta | ACSL4      | 48.63772316 | 0.736499867  | 0.251642499 | 2.9267706    | 0.003425014 | 0.058466695 |
| Beta | DHCR24     | 37.31567561 | 1.507823252  | 0.515229449 | 2.926508288  | 0.003427904 | 0.058466695 |
| Beta | CCDC93     | 67.95800522 | 0.689990869  | 0.235776308 | 2.926463964  | 0.003428392 | 0.058466695 |
| Beta | PFDN5      | 4778.918892 | -0.39725509  | 0.135759491 | -2.926168078 | 0.003431655 | 0.058466695 |
| Beta | DPH6       | 75.43802312 | 0.711788671  | 0.243347643 | 2.924986914  | 0.003444707 | 0.058525148 |
| Beta | CBLN4      | 12.5000201  | 1.837920558  | 0.628357114 | 2.924961804  | 0.003444985 | 0.058525148 |
| Beta | CLU        | 2378.211256 | 1.085995925  | 0.371380816 | 2.924211154  | 0.003453304 | 0.058539771 |
| Beta | WSB1       | 407.6086074 | 0.725000374  | 0.24796201  | 2.923836493  | 0.003457463 | 0.058539771 |
| Beta | NDST2      | 44.71463344 | 0.685156792  | 0.234358872 | 2.923536822  | 0.003460793 | 0.058539771 |
| Beta | UTRN       | 40.50589051 | 0.856413826  | 0.293003502 | 2.922879143  | 0.003468111 | 0.058539771 |
| Beta | SLC41A1    | 42.41554453 | 0.761112669  | 0.260418176 | 2.922655709  | 0.0034706   | 0.058539771 |
| Beta | SDC4       | 49.32641103 | 1.24638552   | 0.426751283 | 2.920636841  | 0.003493168 | 0.058640031 |
| Beta | STARD13    | 15.46642169 | 1.121299288  | 0.383959562 | 2.920357768  | 0.003496298 | 0.058640031 |
| Beta | GALNT7     | 24.59062577 | 0.794431589  | 0.272049936 | 2.920168259  | 0.003498424 | 0.058640031 |
| Beta | GTF2H2     | 71.86867816 | 0.817964173  | 0.280149673 | 2.919739879  | 0.003503237 | 0.058640031 |
| Beta | GBA        | 103.2359875 | 0.670859143  | 0.22978182  | 2.919548389  | 0.00350539  | 0.058640031 |
| Beta | BCL6       | 46.13805428 | 1.165386884  | 0.399226724 | 2.919110406  | 0.003510319 | 0.058640031 |
| Beta | MBD4       | 129.5211177 | 0.463428941  | 0.158761455 | 2.919026804  | 0.00351126  | 0.058640031 |
| Beta | RPS3A      | 13252.99442 | -0.418881942 | 0.143533386 | -2.918358964 | 0.00351879  | 0.058682898 |
| Beta | TEN1       | 103.2483364 | -0.556131123 | 0.1905947   | -2.917872973 | 0.003524279 | 0.058691653 |
| Beta | TMEM125    | 60.59132464 | -1.163037015 | 0.398951027 | -2.915237553 | 0.003554179 | 0.059106346 |
| Beta | KLHDC3     | 140.4852639 | 0.495428008  | 0.169988044 | 2.914487369  | 0.003562732 | 0.059146877 |
| Beta | CCDC88A    | 85.84786833 | 0.737901015  | 0.253213393 | 2.914146865  | 0.003566621 | 0.059146877 |
| Beta | CLIP3      | 75.01944892 | 0.668073943  | 0.229306884 | 2.91344913   | 0.003574601 | 0.059196189 |
| Beta | ZNF573     | 17.04404514 | 1.108897302  | 0.38077796  | 2.912188776  | 0.003589057 | 0.059243334 |
| Beta | SETBP1     | 86.20294933 | 0.752681089  | 0.258534422 | 2.911338013  | 0.003598845 | 0.059243334 |
| Beta | RBMX       | 685.195464  | 0.819864501  | 0.281619804 | 2.911245902  | 0.003599906 | 0.059243334 |
| Beta | ASF1A      | 41.56089867 | 0.794681889  | 0.272985824 | 2.911073834  | 0.003601889 | 0.059243334 |
| Beta | CAVIN3     | 38.38859731 | -1.313491259 | 0.451239434 | -2.91085211  | 0.003604446 | 0.059243334 |
| Beta | ASCL1      | 53.21331199 | 2.007036064  | 0.68956412  | 2.910586568  | 0.00360751  | 0.059243334 |
| Beta | MFS11      | 102.1116127 | 0.438631612  | 0.150780639 | 2.909071178  | 0.003625043 | 0.059448697 |
| Beta | DHX15      | 138.9384253 | 0.61498243   | 0.211480118 | 2.907991707  | 0.00363758  | 0.059452073 |
| Beta | NOMO1      | 33.91957354 | 1.17726437   | 0.404851874 | 2.907889147  | 0.003638773 | 0.059452073 |
| Beta | NCBP1      | 29.27679289 | 0.958185599  | 0.329527616 | 2.907755075  | 0.003640333 | 0.059452073 |
| Beta | ZNF37A     | 171.5466899 | 0.653264891  | 0.224755793 | 2.906554191  | 0.003654336 | 0.059472323 |
| Beta | PLXNA2     | 63.49452635 | 0.872535301  | 0.300204898 | 2.906465905  | 0.003655367 | 0.059472323 |
| Beta | PARP8      | 74.93753499 | 0.653121944  | 0.224753976 | 2.905941672  | 0.003661497 | 0.059472323 |
| Beta | GMEB1      | 45.01432589 | 0.653122755  | 0.224755547 | 2.905924971  | 0.003661692 | 0.059472323 |
| Beta | PHF21A     | 71.93442693 | 0.809844691  | 0.278757424 | 2.905195056  | 0.003670243 | 0.059520064 |
| Beta | EML6       | 37.99513898 | 0.817599004  | 0.281463342 | 2.90481524   | 0.003674699 | 0.059520064 |
| Beta | ZNF383     | 32.33234348 | 0.792898289  | 0.273026101 | 2.904111676  | 0.003682968 | 0.05957238  |
| Beta | ZNF264     | 91.2936962  | 0.637478831  | 0.219661457 | 2.902096891  | 0.003706739 | 0.059827537 |

|      |                   |             |              |             |              |             |             |
|------|-------------------|-------------|--------------|-------------|--------------|-------------|-------------|
| Beta | <i>AIMP1</i>      | 437.0074896 | 0.382441132  | 0.131808373 | 2.901493465  | 0.003713885 | 0.059827537 |
| Beta | <i>CARM1</i>      | 47.29058187 | 0.774525199  | 0.266940468 | 2.901490374  | 0.003713922 | 0.059827537 |
| Beta | <i>SURF2</i>      | 690.5268904 | -0.537446438 | 0.18528114  | -2.900707748 | 0.003723209 | 0.059863886 |
| Beta | <i>ACO07029.1</i> | 9.229409497 | 1.51733481   | 0.52314075  | 2.900433222  | 0.003726472 | 0.059863886 |
| Beta | <i>HEBP1</i>      | 154.4747181 | -0.535809504 | 0.184760509 | -2.900021804 | 0.003731367 | 0.059863886 |
| Beta | <i>TMEM140</i>    | 9.863078884 | 1.542359558  | 0.532183478 | 2.898172572  | 0.00375344  | 0.060136415 |
| Beta | <i>KIAA0319</i>   | 31.03530532 | 0.831749512  | 0.287098233 | 2.897090323  | 0.003766413 | 0.060262608 |
| Beta | <i>AHDC1</i>      | 114.3891769 | 0.850719992  | 0.293699147 | 2.896569505  | 0.003772671 | 0.060281158 |
| Beta | <i>ITPR3</i>      | 101.2707744 | 0.759423978  | 0.262227202 | 2.896053392  | 0.003778881 | 0.060298906 |
| Beta | <i>QSER1</i>      | 42.08342783 | 0.843596543  | 0.291388281 | 2.895094268  | 0.003790447 | 0.060401945 |
| Beta | <i>ZNF721</i>     | 200.135131  | 0.554906548  | 0.191971865 | 2.890561846  | 0.003845539 | 0.061182635 |
| Beta | <i>EMC10</i>      | 953.3137965 | 0.427123986  | 0.147782783 | 2.890214788  | 0.003849787 | 0.061182635 |
| Beta | <i>MAST4-AS1</i>  | 12.74346013 | 1.142742274  | 0.395461837 | 2.889639825  | 0.003856834 | 0.061212363 |
| Beta | <i>ZNF638</i>     | 205.2725669 | 0.753343913  | 0.260813666 | 2.888437263  | 0.003871613 | 0.061236648 |
| Beta | <i>GRWD1</i>      | 33.68003137 | 0.782608101  | 0.270952619 | 2.888357766  | 0.003872591 | 0.061236648 |
| Beta | <i>CASP8AP2</i>   | 58.40988387 | 0.907045983  | 0.31404676  | 2.88825136   | 0.003873902 | 0.061236648 |
| Beta | <i>FOXP4</i>      | 182.9973988 | 0.673875077  | 0.233445924 | 2.886643149  | 0.003893756 | 0.061423484 |
| Beta | <i>NPY</i>        | 1865.216892 | 2.163880494  | 0.749667698 | 2.886452889  | 0.003896111 | 0.061423484 |
| Beta | <i>LV6E</i>       | 107.7217863 | 1.01063113   | 0.350249502 | 2.885460578  | 0.003908414 | 0.061535404 |
| Beta | <i>DLGAP1-AS1</i> | 24.28193236 | 1.459286936  | 0.506031785 | 2.883785127  | 0.003929268 | 0.061781463 |
| Beta | <i>SSTR5-AS1</i>  | 62.0093467  | 1.232634308  | 0.427662397 | 2.882260204  | 0.003948335 | 0.061890229 |
| Beta | <i>FUCA1</i>      | 151.8243447 | 0.715142226  | 0.248235646 | 2.880900611  | 0.003965407 | 0.061890229 |
| Beta | <i>STMN3</i>      | 119.3865841 | 0.591503346  | 0.205357104 | 2.880364667  | 0.003972154 | 0.061890229 |
| Beta | <i>ZF23</i>       | 30.01461004 | 0.76269377   | 0.264815523 | 2.880094648  | 0.003975558 | 0.061890229 |
| Beta | <i>SELENON</i>    | 98.53425588 | 0.746351958  | 0.259225608 | 2.879159835  | 0.003987362 | 0.061890229 |
| Beta | <i>ZB2217.1</i>   | 12.77811327 | 1.679926008  | 0.583483501 | 2.879131982  | 0.003987714 | 0.061890229 |
| Beta | <i>SEPSECS</i>    | 17.59871411 | 0.892149668  | 0.309904127 | 2.878792475  | 0.003992009 | 0.061890229 |
| Beta | <i>LMNA</i>       | 670.7780167 | -0.666072871 | 0.231375845 | -2.878748516 | 0.003992566 | 0.061890229 |
| Beta | <i>UBTF</i>       | 91.31763945 | 0.802134393  | 0.2786471   | 2.878674833  | 0.003993499 | 0.061890229 |
| Beta | <i>ATP1B3</i>     | 177.2324067 | -0.590251231 | 0.205058011 | -2.878459754 | 0.003996223 | 0.061890229 |
| Beta | <i>CNIH2</i>      | 1124.969107 | -0.997065058 | 0.346459316 | -2.877870536 | 0.004003694 | 0.061890229 |
| Beta | <i>NPAS2</i>      | 32.54989269 | 0.811121778  | 0.28184793  | 2.87787027   | 0.004003697 | 0.061890229 |
| Beta | <i>KLF10</i>      | 232.0191805 | 0.780313101  | 0.271146515 | 2.877828247  | 0.004004231 | 0.061890229 |
| Beta | <i>PATL1</i>      | 52.17355318 | 0.790285963  | 0.274656761 | 2.877358485  | 0.004010197 | 0.061901532 |
| Beta | <i>NCBP2</i>      | 183.1484351 | 0.564590151  | 0.196332215 | 2.875687776  | 0.004031483 | 0.062086804 |
| Beta | <i>BLZF1</i>      | 39.357901   | 0.677824993  | 0.23571665  | 2.875592334  | 0.004032702 | 0.062086804 |
| Beta | <i>DGCR2</i>      | 90.01784096 | 0.724677046  | 0.252259945 | 2.872739254  | 0.004069298 | 0.062500855 |
| Beta | <i>PIGK</i>       | 111.4838923 | 0.541149551  | 0.188396693 | 2.8723941    | 0.004073746 | 0.062500855 |
| Beta | <i>TOB2</i>       | 54.62118106 | 0.632558317  | 0.220230043 | 2.872261692  | 0.004075453 | 0.062500855 |
| Beta | <i>PRELID1</i>    | 965.495049  | -0.50899488  | 0.177393925 | -2.869291488 | 0.004113925 | 0.062910981 |
| Beta | <i>CDK7</i>       | 45.19728053 | 0.63476808   | 0.221255055 | 2.868942722  | 0.004118464 | 0.062910981 |
| Beta | <i>FZD3</i>       | 93.86353873 | 0.732472631  | 0.25531994  | 2.868842249  | 0.004119772 | 0.062910981 |
| Beta | <i>ERAP2</i>      | 9.741519941 | 1.325719958  | 0.462155569 | 2.868557794  | 0.004123479 | 0.062910981 |
| Beta | <i>RXR8</i>       | 56.81447149 | 0.563026258  | 0.196433296 | 2.866246547  | 0.004153706 | 0.063233783 |
| Beta | <i>STK39</i>      | 34.3018949  | 0.910931274  | 0.317827039 | 2.866122641  | 0.004155332 | 0.063233783 |
| Beta | <i>SNK766</i>     | 98.05840349 | 0.561485988  | 0.195971504 | 2.865140983  | 0.004168236 | 0.063348618 |
| Beta | <i>SORT1</i>      | 183.9140493 | 0.647897213  | 0.226182294 | 2.864491302  | 0.004176796 | 0.063397226 |
| Beta | <i>FTX</i>        | 149.46187   | 0.913915129  | 0.319166563 | 2.863442591  | 0.004190647 | 0.063525918 |
| Beta | <i>VPS45</i>      | 35.30973329 | 0.585315283  | 0.204454464 | 2.862814879  | 0.004198958 | 0.063570398 |
| Beta | <i>NUDC</i>       | 1031.770788 | -0.555922671 | 0.194279038 | -2.861465014 | 0.00421688  | 0.063760095 |
| Beta | <i>ZCCHC4</i>     | 11.44833207 | 1.041410024  | 0.364261494 | 2.858962696  | 0.004250288 | 0.064038952 |
| Beta | <i>EIF2AK2</i>    | 302.8989182 | 0.501029533  | 0.175250783 | 2.858928922  | 0.00425074  | 0.064038952 |
| Beta | <i>TMEM8A</i>     | 77.06800925 | 0.719116893  | 0.251539129 | 2.858866911  | 0.004251571 | 0.064038952 |
| Beta | <i>KIAA0586</i>   | 51.01967263 | 0.854478398  | 0.298944702 | 2.858315905  | 0.004258962 | 0.064068653 |
| Beta | <i>STAG2</i>      | 264.6616567 | 0.732349285  | 0.256462413 | 2.855581359  | 0.004295811 | 0.064540883 |
| Beta | <i>ELL2</i>       | 349.2579566 | 0.670468695  | 0.234876668 | 2.854556393  | 0.004309698 | 0.064642254 |
| Beta | <i>FGD6</i>       | 22.38154117 | 1.108412957  | 0.388334078 | 2.85427682   | 0.004313493 | 0.064642254 |
| Beta | <i>HERPUD1</i>    | 1491.942375 | -0.769716639 | 0.269719853 | -2.853763382 | 0.00432047  | 0.064657533 |
| Beta | <i>PEBP1</i>      | 4286.332344 | -0.444436896 | 0.155757096 | -2.853397421 | 0.004325449 | 0.064657533 |
| Beta | <i>DPY19L3</i>    | 22.36776626 | 0.80452127   | 0.28222082  | 2.850680086  | 0.004362584 | 0.065130292 |
| Beta | <i>UTP14A</i>     | 19.77157479 | 0.767649767  | 0.269342945 | 2.850083069  | 0.004370781 | 0.065147959 |
| Beta | <i>SEPTIN8</i>    | 43.84124537 | 0.651346526  | 0.228559345 | 2.84979171   | 0.004374787 | 0.065147959 |
| Beta | <i>GINM1</i>      | 409.6176995 | 0.496849819  | 0.174415103 | 2.848662826  | 0.004390338 | 0.065297306 |
| Beta | <i>EP300</i>      | 180.9041541 | 0.666889334  | 0.234149843 | 2.848130604  | 0.004397687 | 0.065324441 |
| Beta | <i>KNOP1</i>      | 70.12391969 | 0.834943529  | 0.293205649 | 2.847637935  | 0.0044045   | 0.065343552 |
| Beta | <i>PKF8B4</i>     | 13.77858198 | 0.943900906  | 0.331588596 | 2.846602437  | 0.004418851 | 0.065371646 |
| Beta | <i>KCTD8</i>      | 24.924337   | 1.029353254  | 0.361634187 | 2.846393652  | 0.00442175  | 0.065371646 |
| Beta | <i>ACO73508.3</i> | 15.53679607 | 0.802461307  | 0.281930886 | 2.846305059  | 0.00442298  | 0.065371646 |
| Beta | <i>NUBP1</i>      | 52.00221808 | 0.771500334  | 0.271295171 | 2.843767292  | 0.00445836  | 0.065730342 |
| Beta | <i>TMEM150A</i>   | 26.38350088 | 0.873981728  | 0.307368562 | 2.843432405  | 0.004463048 | 0.065730342 |
| Beta | <i>ITFG2</i>      | 41.89459863 | 0.590473134  | 0.207671817 | 2.84329931   | 0.004464912 | 0.065730342 |
| Beta | <i>AL353719.1</i> | 5.028301717 | 1.338865709  | 0.470938591 | 2.842973019  | 0.004469485 | 0.065730342 |
| Beta | <i>DOP1A</i>      | 50.28762316 | 0.881979167  | 0.310331587 | 2.842054127  | 0.004482388 | 0.065822971 |

|      |            |             |              |             |              |             |             |
|------|------------|-------------|--------------|-------------|--------------|-------------|-------------|
| Beta | IFIH1      | 16.43008647 | 0.842281889  | 0.296397358 | 2.841732111  | 0.004486918 | 0.065822971 |
| Beta | USP40      | 52.2753063  | 0.716654474  | 0.252295702 | 2.840533815  | 0.00450381  | 0.065922568 |
| Beta | TUBG2      | 47.93180119 | 0.638229699  | 0.224692403 | 2.840459624  | 0.004504858 | 0.065922568 |
| Beta | SRF        | 50.17322815 | 0.814270719  | 0.286776589 | 2.839390489  | 0.004519981 | 0.066005301 |
| Beta | STAT5A     | 13.79183452 | 0.964810723  | 0.339809328 | 2.83927086   | 0.004521676 | 0.066005301 |
| Beta | ERIC5      | 79.90937981 | -0.682994772 | 0.240707493 | -2.83744707  | 0.004547589 | 0.066301711 |
| Beta | CMTM4      | 144.0960216 | 0.633952055  | 0.223489959 | 2.83660196   | 0.004559642 | 0.06636703  |
| Beta | CDKN2C     | 77.75190196 | 0.763252304  | 0.269120929 | 2.836094191  | 0.004566898 | 0.06636703  |
| Beta | ZNF776     | 43.90749654 | 0.737404562  | 0.260019962 | 2.835953656  | 0.004568908 | 0.06636703  |
| Beta | SCMH1      | 49.80352066 | 0.562458275  | 0.198472786 | 2.833931471  | 0.004597919 | 0.066641978 |
| Beta | AL161457.2 | 10.26506043 | 1.135056067  | 0.400535148 | 2.833848843  | 0.004599108 | 0.066641978 |
| Beta | TCF20      | 44.41604835 | 0.904907683  | 0.319388846 | 2.833247604  | 0.004607768 | 0.066685738 |
| Beta | TPR        | 294.3440226 | 0.539357519  | 0.190400918 | 2.832746412  | 0.004614998 | 0.066708726 |
| Beta | KIAA0040   | 23.4609942  | 1.160375804  | 0.409777886 | 2.831718947  | 0.004629852 | 0.066841728 |
| Beta | ZNF709     | 22.32226114 | 0.936273632  | 0.330732684 | 2.830907489  | 0.004641614 | 0.066929816 |
| Beta | USP53      | 64.25514448 | 0.902728915  | 0.318960022 | 2.830225898  | 0.004651515 | 0.06699088  |
| Beta | SERPINA1   | 452.1542688 | 1.948824293  | 0.688984133 | 2.828547424  | 0.004675977 | 0.067183416 |
| Beta | TRIM38     | 36.98491913 | 0.913751091  | 0.323061983 | 2.828407983  | 0.004678015 | 0.067183416 |
| Beta | RPS6       | 13061.43619 | -0.362897975 | 0.128316826 | -2.828140212 | 0.00468193  | 0.067183416 |
| Beta | NDUFB10    | 969.6693107 | -0.404214695 | 0.142977567 | -2.827119686 | 0.004696877 | 0.067298003 |
| Beta | ACO10168.2 | 43.95112215 | 0.831417346  | 0.294128073 | 2.826718771  | 0.004702761 | 0.067298003 |
| Beta | NFRKB      | 28.28149414 | 0.727781298  | 0.257491276 | 2.826430895  | 0.00470699  | 0.067298003 |
| Beta | MEGF9      | 98.17996163 | 0.701256962  | 0.24817876  | 2.825612323  | 0.004719034 | 0.067323949 |
| Beta | RRAGA      | 278.9922292 | -0.53650332  | 0.18990182  | -2.825161555 | 0.004725678 | 0.067323949 |
| Beta | TESC       | 98.84822554 | -1.052881716 | 0.372682039 | -2.82514746  | 0.004725886 | 0.067323949 |
| Beta | ACVR2A     | 20.62575725 | 0.905802741  | 0.320962735 | 2.82214302   | 0.00477039  | 0.06787616  |
| Beta | ZFYVE16    | 69.77154165 | 0.736025827  | 0.260970976 | 2.820335952  | 0.00479734  | 0.067971608 |
| Beta | AKT2       | 73.80624298 | 0.698913455  | 0.247814143 | 2.820313023  | 0.004797682 | 0.067971608 |
| Beta | UBLCP1     | 140.234989  | 0.563652363  | 0.199855692 | 2.820296773  | 0.004797925 | 0.067971608 |
| Beta | MMAA       | 14.23714107 | 1.013908634  | 0.359548205 | 2.81995187   | 0.004803085 | 0.067971608 |
| Beta | NUP50      | 72.70444365 | 0.605373665  | 0.21468919  | 2.819767806  | 0.004805841 | 0.067971608 |
| Beta | CD47       | 234.5526599 | 0.560315041  | 0.198865407 | 2.817559126  | 0.00483902  | 0.068289177 |
| Beta | EMSY       | 48.01830866 | 0.767725701  | 0.272484296 | 2.817504393  | 0.004839845 | 0.068289177 |
| Beta | CCDC137    | 62.02894114 | 0.664571862  | 0.235928083 | 2.816840853  | 0.004849855 | 0.068348852 |
| Beta | JAGN1      | 191.4713165 | -0.420882978 | 0.149443073 | -2.816343164 | 0.004857375 | 0.068373339 |
| Beta | WDFY1      | 87.99995279 | 0.712252392  | 0.25311008  | 2.814002471  | 0.004892885 | 0.068729179 |
| Beta | NME2       | 2723.932963 | -0.453125907 | 0.161054792 | -2.813489123 | 0.004900704 | 0.068729179 |
| Beta | GADD45GIP1 | 730.1741576 | -0.586788117 | 0.208588399 | -2.813138794 | 0.004906047 | 0.068729179 |
| Beta | PLSCR1     | 116.3270524 | 0.772713159  | 0.274707791 | 2.812854907  | 0.00491038  | 0.068729179 |
| Beta | SFT2D2     | 207.4639234 | 0.694269125  | 0.246827786 | 2.812767297  | 0.004911718 | 0.068729179 |
| Beta | TNK2       | 52.89371334 | 0.650199748  | 0.231313795 | 2.810899143  | 0.004940327 | 0.069047785 |
| Beta | SNX25      | 26.65768587 | 0.722493656  | 0.257141094 | 2.809716821  | 0.004958511 | 0.069183831 |
| Beta | CISD2      | 549.9101564 | -0.419531643 | 0.149395747 | -2.808189994 | 0.004982082 | 0.069183831 |
| Beta | KDM3A      | 66.31479917 | 0.68666788   | 0.244535088 | 2.808054603  | 0.004984178 | 0.069183831 |
| Beta | ASH1L      | 364.9335464 | 0.602331107  | 0.214524509 | 2.80774961   | 0.0049889   | 0.069183831 |
| Beta | MARCH4     | 23.21203123 | 1.108586261  | 0.394849164 | 2.807619621  | 0.004990914 | 0.069183831 |
| Beta | KLHL8      | 55.7430301  | 0.741261131  | 0.26403071  | 2.807480729  | 0.004993067 | 0.069183831 |
| Beta | GLI4       | 48.13832661 | -0.825741377 | 0.294166763 | -2.807051925 | 0.004999718 | 0.069183831 |
| Beta | PPME1      | 130.5821868 | 0.571597928  | 0.203631382 | 2.807022775  | 0.005000171 | 0.069183831 |
| Beta | BMP5       | 124.9932882 | 0.9963576    | 0.355014685 | 2.806525033  | 0.005007902 | 0.069183831 |
| Beta | TNS2       | 27.90251258 | 0.984087264  | 0.350647997 | 2.80648192   | 0.005008572 | 0.069183831 |
| Beta | ZNF347     | 23.04571162 | 0.868730165  | 0.309636348 | 2.805646596  | 0.005021573 | 0.069282478 |
| Beta | SDF2L1     | 1523.012681 | -0.706485156 | 0.251883626 | -2.804807787 | 0.005034659 | 0.069307394 |
| Beta | AREL1      | 32.38875812 | 0.766094074  | 0.273158272 | 2.804579439  | 0.005038227 | 0.069307394 |
| Beta | ENTPD1-AS1 | 43.49623435 | 0.818363392  | 0.291813621 | 2.804404361  | 0.005040964 | 0.069307394 |
| Beta | ZNF75A     | 80.19069306 | 0.629924738  | 0.22477803  | 2.80243019   | 0.005071919 | 0.069652001 |
| Beta | PAK1       | 71.45379695 | 0.702357228  | 0.250779024 | 2.800701661  | 0.005099164 | 0.069944908 |
| Beta | DDX55      | 65.10557291 | 0.660431695  | 0.235890853 | 2.799734225  | 0.00511447  | 0.070073568 |
| Beta | NLRCS      | 12.23357461 | 1.170206634  | 0.418174777 | 2.798367328  | 0.005136166 | 0.07028939  |
| Beta | PI4KB      | 148.4152505 | 0.546805797  | 0.19543902  | 2.7978333    | 0.005144666 | 0.070324309 |
| Beta | TMEM259    | 286.4805804 | 0.610147829  | 0.218108049 | 2.797456723  | 0.005150667 | 0.070325038 |
| Beta | ST6GALNAC5 | 16.75386102 | 1.117865495  | 0.39970215  | 2.796746265  | 0.005162005 | 0.070385118 |
| Beta | SF3B5      | 1080.551505 | -0.416719723 | 0.149038652 | -2.796051338 | 0.005173118 | 0.070385118 |
| Beta | PIOD2      | 223.3064105 | 0.869710538  | 0.311100305 | 2.795595261  | 0.005180423 | 0.070385118 |
| Beta | SAMD8      | 118.1155746 | 0.704674165  | 0.252096478 | 2.795255891  | 0.005185865 | 0.070385118 |
| Beta | KIAA0355   | 113.9555685 | 0.83208128   | 0.297688721 | 2.795138749  | 0.005187744 | 0.070385118 |
| Beta | PGM2L1     | 39.41036711 | 1.453204982  | 0.519939633 | 2.794949432  | 0.005190783 | 0.070385118 |
| Beta | TRAPP1     | 41.4441842  | 0.671603546  | 0.240331872 | 2.794483896  | 0.005198263 | 0.070405798 |
| Beta | SLC38A2    | 269.6157762 | 1.006906559  | 0.360491255 | 2.793151137  | 0.00521973  | 0.070615658 |
| Beta | LCMT2      | 22.4168383  | 0.927974749  | 0.33228421  | 2.792713953  | 0.005226789 | 0.070630346 |
| Beta | GOLGA2     | 469.5135989 | 0.713923932  | 0.255859369 | 2.790298181  | 0.005265952 | 0.071068076 |
| Beta | ADPRHL2    | 45.5818153  | 0.653256416  | 0.23414414  | 2.789975509  | 0.005271203 | 0.071068076 |
| Beta | ZNF286A    | 49.02267392 | 0.642047454  | 0.230162797 | 2.789536203  | 0.005278359 | 0.071083511 |

|      |            |             |              |             |              |             |             |
|------|------------|-------------|--------------|-------------|--------------|-------------|-------------|
| Beta | PKDCC      | 15.16322356 | 1.175246249  | 0.421598998 | 2.787592603  | 0.005310128 | 0.071280417 |
| Beta | LY6H       | 60.36473753 | 1.46013414   | 0.523806602 | 2.787544361  | 0.005310918 | 0.071280417 |
| Beta | NUP35      | 28.5064837  | 0.792397603  | 0.284264596 | 2.787535329  | 0.005311066 | 0.071280417 |
| Beta | TMPO       | 49.60453808 | 0.889683728  | 0.319215145 | 2.787097483  | 0.005318248 | 0.071295875 |
| Beta | MAPK8IP2   | 149.8454222 | 0.537529683  | 0.192985898 | 2.78533141   | 0.005347304 | 0.071604214 |
| Beta | AC093673.1 | 50.48912702 | -0.855849715 | 0.30736305  | -2.784491226 | 0.005361177 | 0.071644626 |
| Beta | ARX        | 19.85144011 | 2.488017951  | 0.893599601 | 2.784264842  | 0.005364921 | 0.071644626 |
| Beta | MYO19      | 85.38763634 | 0.732800052  | 0.263213818 | 2.784048561  | 0.0053685   | 0.071644626 |
| Beta | CCDC144A   | 29.91292573 | 1.186434554  | 0.4262326   | 2.783537799  | 0.00537696  | 0.071656848 |
| Beta | KPNA5      | 105.7770026 | 0.638374032  | 0.229361833 | 2.783261817  | 0.005381536 | 0.071656848 |
| Beta | NCOR1      | 220.0715314 | 0.458129077  | 0.164658065 | 2.782305734  | 0.005397417 | 0.071787464 |
| Beta | ACAD10     | 36.04990651 | 0.680484599  | 0.244641981 | 2.781552847  | 0.005409952 | 0.071873342 |
| Beta | UCHL1      | 2228.611461 | -0.541920064 | 0.194899635 | -2.78050836  | 0.005427386 | 0.072024034 |
| Beta | MAP3K4     | 74.48311898 | 0.776225142  | 0.279333948 | 2.778842842  | 0.005455291 | 0.072279646 |
| Beta | DHRS1      | 38.9012835  | 0.754136324  | 0.271405852 | 2.778629567  | 0.005458874 | 0.072279646 |
| Beta | WASHC5     | 61.03476774 | 0.506542428  | 0.182473985 | 2.775970661  | 0.005503717 | 0.072791896 |
| Beta | SLC7A2     | 407.4048979 | 0.920595164  | 0.331783043 | 2.774690217  | 0.005525431 | 0.072907043 |
| Beta | HYI        | 151.6782974 | -0.592164632 | 0.213461745 | -2.774101893 | 0.005535434 | 0.072907043 |
| Beta | ZXDC       | 57.52062064 | 0.685460813  | 0.247107499 | 2.773937718  | 0.005538228 | 0.072907043 |
| Beta | MLLT3      | 25.26028756 | 0.85751439   | 0.309142914 | 2.773844562  | 0.005539814 | 0.072907043 |
| Beta | ZNF154     | 9.723231451 | 1.156642737  | 0.417117705 | 2.772940883  | 0.005555221 | 0.072907043 |
| Beta | AC108134.2 | 60.33411774 | 1.172252046  | 0.422770676 | 2.772784664  | 0.005557889 | 0.072907043 |
| Beta | GART       | 36.18563364 | 0.714446851  | 0.257734953 | 2.772021578  | 0.005570934 | 0.072907043 |
| Beta | UNC80      | 133.6734727 | 0.671144109  | 0.242116037 | 2.77199362   | 0.005571413 | 0.072907043 |
| Beta | INO80B     | 36.09259204 | 0.93617702   | 0.337774205 | 2.771606018  | 0.00557805  | 0.072907043 |
| Beta | TMEM187    | 54.46409214 | -0.681133919 | 0.245756683 | -2.771578419 | 0.005578523 | 0.072907043 |
| Beta | TRIM23     | 105.3098627 | 0.643594334  | 0.232225116 | 2.771424321  | 0.005581164 | 0.072907043 |
| Beta | APBP2      | 72.25139994 | 0.562150234  | 0.202903049 | 2.770536157  | 0.005596409 | 0.072907043 |
| Beta | VAR52      | 15.69856753 | 0.834264253  | 0.301149542 | 2.770265723  | 0.005601058 | 0.072907043 |
| Beta | PRR12      | 63.13073377 | 1.02147849   | 0.36875139  | 2.770100718  | 0.005603896 | 0.072907043 |
| Beta | AC008969.1 | 37.27636555 | 0.816402515  | 0.294725727 | 2.770041569  | 0.005604914 | 0.072907043 |
| Beta | NCOA2      | 82.42916457 | 0.73228423   | 0.264401306 | 2.769593849  | 0.005612623 | 0.072927096 |
| Beta | PYGB       | 41.97915911 | 1.044847078  | 0.377325214 | 2.769088945  | 0.005621329 | 0.072943188 |
| Beta | RPAP2      | 86.29911452 | 0.659549899  | 0.238207272 | 2.76880673   | 0.0056262   | 0.072943188 |
| Beta | AKR1A1     | 371.0649223 | -0.628900186 | 0.227171747 | -2.768390853 | 0.005633385 | 0.072956348 |
| Beta | PTCD2      | 16.60002831 | 1.125070275  | 0.406577965 | 2.767169822  | 0.005654529 | 0.073150057 |
| Beta | MAFK       | 36.35149913 | 0.883075666  | 0.319577627 | 2.763258724  | 0.005722738 | 0.073804378 |
| Beta | ZNF718     | 13.02487089 | 1.22101627   | 0.441882659 | 2.763213822  | 0.005723526 | 0.073804378 |
| Beta | RBPJ       | 208.6607031 | 0.671468549  | 0.243015928 | 2.763063951  | 0.005726155 | 0.073804378 |
| Beta | AL157392.3 | 18.67688848 | 0.913221604  | 0.330549574 | 2.762737196  | 0.00573189  | 0.073804378 |
| Beta | ALID1B     | 308.4847016 | 0.497337753  | 0.180049837 | 2.762222733  | 0.00574093  | 0.073804378 |
| Beta | SIX4       | 9.374983651 | 1.237646318  | 0.448076771 | 2.762130057  | 0.00574256  | 0.073804378 |
| Beta | ZNHIT2     | 103.0885245 | -0.568823455 | 0.206085733 | -2.760130198 | 0.005777833 | 0.074177087 |
| Beta | PRKAA2     | 61.65202422 | 0.853982216  | 0.309489773 | 2.759322895  | 0.005792127 | 0.074279949 |
| Beta | MED8       | 213.1439662 | -0.473232644 | 0.171673087 | -2.756591921 | 0.005840719 | 0.074802097 |
| Beta | CTTNBP2    | 16.05680409 | 1.525851489  | 0.553635719 | 2.7560568    | 0.005850284 | 0.074802097 |
| Beta | CD274      | 11.16046395 | 1.033310824  | 0.374935328 | 2.75597082   | 0.005851822 | 0.074802097 |
| Beta | ATP5MC3    | 1560.331011 | -0.45191532  | 0.16407346  | -2.754347471 | 0.005880929 | 0.075048528 |
| Beta | ELL        | 29.59637592 | 0.790582945  | 0.287047551 | 2.754188085  | 0.005883794 | 0.075048528 |
| Beta | MED29      | 154.5100024 | 0.470860691  | 0.171072785 | 2.752399748  | 0.005916026 | 0.075378327 |
| Beta | PKD3       | 137.9897681 | 0.640366657  | 0.232724564 | 2.751607503  | 0.005930355 | 0.075479569 |
| Beta | MPST       | 36.57338637 | -0.81981435  | 0.298045904 | -2.750631163 | 0.005948057 | 0.075623474 |
| Beta | IKKB       | 31.93309349 | 0.758302892  | 0.275793298 | 2.749533423  | 0.005968018 | 0.075795747 |
| Beta | ATAD2B     | 31.75145844 | 0.804452449  | 0.292625917 | 2.749081345  | 0.005976255 | 0.07581893  |
| Beta | HCG18      | 107.0509696 | 0.652139204  | 0.237284784 | 2.748339755  | 0.005989791 | 0.075836911 |
| Beta | CDK19      | 11.63381201 | 1.166378537  | 0.424399865 | 2.748300916  | 0.0059905   | 0.075836911 |
| Beta | AL390955.2 | 16.79047776 | -1.074069829 | 0.391006251 | -2.746937742 | 0.006015455 | 0.076010035 |
| Beta | TMEM132D   | 59.67040686 | 1.115978569  | 0.4062755   | 2.746851754  | 0.006017033 | 0.076010035 |
| Beta | TOM1       | 103.8566374 | 0.554419748  | 0.201938689 | 2.745485524  | 0.006042143 | 0.076245787 |
| Beta | SLC46A3    | 72.89784091 | 0.833474921  | 0.303715446 | 2.744262537  | 0.006064701 | 0.076448858 |
| Beta | KIZ        | 59.22386222 | 0.63206879   | 0.230473762 | 2.742476127  | 0.006097788 | 0.076663553 |
| Beta | ATP6V1F    | 1599.225687 | -0.382510658 | 0.139482036 | -2.742365028 | 0.006099851 | 0.076663553 |
| Beta | ATP9A      | 144.9600059 | 0.714755833  | 0.260641647 | 2.74229326   | 0.006101184 | 0.076663553 |
| Beta | NOC3L      | 32.35258997 | 0.900448379  | 0.328429843 | 2.741676486  | 0.006112651 | 0.076692609 |
| Beta | UBXN2B     | 50.54136615 | 0.590182811  | 0.215279582 | 2.74147137   | 0.006116469 | 0.076692609 |
| Beta | SQCS1      | 20.23044284 | 2.00538957   | 0.731734061 | 2.740598911  | 0.006132732 | 0.076815067 |
| Beta | GRINA      | 278.3616544 | 0.575917738  | 0.21018595  | 2.740039184  | 0.006143186 | 0.076864583 |
| Beta | LYST       | 106.9676144 | 0.594651928  | 0.217131577 | 2.738670881  | 0.006168809 | 0.077103596 |
| Beta | FAM193A    | 43.96368421 | 0.731873851  | 0.267354951 | 2.737461367  | 0.006191539 | 0.077209772 |
| Beta | ZCCHC9     | 89.46858231 | 0.623331619  | 0.227717565 | 2.737301442  | 0.00619455  | 0.077209772 |
| Beta | ANKRA2     | 116.0424712 | 0.602630516  | 0.220164978 | 2.737177008  | 0.006196894 | 0.077209772 |
| Beta | CNP        | 125.9526822 | 0.932478905  | 0.340720876 | 2.736782423  | 0.006204331 | 0.077221067 |
| Beta | SPTY2D10S  | 19.09805253 | 0.932646882  | 0.340964503 | 2.73531958   | 0.006231974 | 0.077483554 |

|      |                 |             |              |             |              |             |             |
|------|-----------------|-------------|--------------|-------------|--------------|-------------|-------------|
| Beta | <i>CLSTN1</i>   | 208.7566299 | 0.646322679  | 0.236331345 | 2.734815731  | 0.006241521 | 0.077520734 |
| Beta | <i>SCML1</i>    | 81.53557581 | 0.850766628  | 0.311176716 | 2.734030487  | 0.006256425 | 0.077561653 |
| Beta | <i>RPRD2</i>    | 152.8553602 | 0.627040542  | 0.229365551 | 2.733804354  | 0.006260723 | 0.077561653 |
| Beta | <i>TRIM66</i>   | 20.49137751 | 1.107841406  | 0.405267392 | 2.733606077  | 0.006264494 | 0.077561653 |
| Beta | <i>UHRF1BP1</i> | 33.76897689 | 0.765036966  | 0.279988789 | 2.732384287  | 0.006287775 | 0.077701895 |
| Beta | <i>MAP3K8</i>   | 63.73648557 | -1.056597338 | 0.386703081 | -2.732322006 | 0.006288964 | 0.077701895 |
| Beta | <i>HSD17B11</i> | 102.8475841 | 0.517553428  | 0.189442809 | 2.731977717  | 0.006295555 | 0.077702074 |
| Beta | <i>TMA16</i>    | 43.13429439 | 0.898198668  | 0.328824404 | 2.731545037  | 0.006303812 | 0.077722918 |
| Beta | <i>DTD2</i>     | 30.68329897 | 0.661598334  | 0.242250737 | 2.731047763  | 0.006313332 | 0.077759207 |
| Beta | <i>THUMPD2</i>  | 97.26948415 | 0.662817472  | 0.242789135 | 2.730012905  | 0.006333185 | 0.07777172  |
| Beta | <i>EXOC6</i>    | 59.20260833 | 0.76453598   | 0.280050594 | 2.729992349  | 0.00633358  | 0.07777172  |
| Beta | <i>ARV1</i>     | 92.02760165 | 0.411997071  | 0.150916542 | 2.729966282  | 0.00633408  | 0.07777172  |
| Beta | <i>CRB3</i>     | 117.2183797 | -0.722336403 | 0.264649158 | -2.729411306 | 0.006344751 | 0.07782193  |
| Beta | <i>ID1</i>      | 161.1804095 | 1.869886227  | 0.685234998 | 2.728824756  | 0.006356047 | 0.07787969  |
| Beta | <i>PAPOLG</i>   | 16.70926309 | 1.025201705  | 0.375780627 | 2.728192014  | 0.006368253 | 0.077948468 |
| Beta | <i>PIGM</i>     | 62.8151675  | 0.727708658  | 0.266791593 | 2.727629642  | 0.006379119 | 0.078000721 |
| Beta | <i>SERPINI1</i> | 110.4522586 | 0.794289374  | 0.291364607 | 2.726101099  | 0.006408737 | 0.078222964 |
| Beta | <i>KCTD7</i>    | 17.20438038 | 0.895519411  | 0.32850934  | 2.726008983  | 0.006410525 | 0.078222964 |
| Beta | <i>ZNF124</i>   | 17.03948823 | 0.847390594  | 0.310972953 | 2.724965578  | 0.006430819 | 0.078266404 |
| Beta | <i>LRATD1</i>   | 18.63524725 | 0.906378105  | 0.332626048 | 2.724916198  | 0.006431781 | 0.078266404 |
| Beta | <i>BAG1</i>     | 579.742256  | -0.54996906  | 0.201837936 | -2.724805216 | 0.006433943 | 0.078266404 |
| Beta | <i>DCLRE1C</i>  | 41.41293344 | 0.700913766  | 0.257299556 | 2.72411572   | 0.006447391 | 0.078280644 |
| Beta | <i>LEMD3</i>    | 59.19691468 | 0.641611907  | 0.235538216 | 2.724024659  | 0.006449169 | 0.078280644 |
| Beta | <i>RBM6</i>     | 131.517088  | 0.48196584   | 0.176950833 | 2.723727441  | 0.006454975 | 0.078280644 |
| Beta | <i>GBE1</i>     | 51.54547758 | 0.599875217  | 0.220280044 | 2.723239049  | 0.006464526 | 0.078316147 |
| Beta | <i>UBE2W</i>    | 109.9106535 | 0.527470092  | 0.193761247 | 2.722268253  | 0.006483549 | 0.078466206 |
| Beta | <i>COMMD7</i>   | 209.3864468 | -0.484651055 | 0.178188046 | -2.719885349 | 0.006530455 | 0.078953073 |
| Beta | <i>PREPL</i>    | 188.7660827 | 0.665829331  | 0.24483189  | 2.719536783  | 0.006537342 | 0.078955604 |
| Beta | <i>ZNF445</i>   | 21.89399999 | 0.997790471  | 0.36700473  | 2.718740083  | 0.006553108 | 0.079065254 |
| Beta | <i>ZFYVE27</i>  | 60.62805533 | 0.615673523  | 0.226590804 | 2.717116107  | 0.00658535  | 0.079373272 |
| Beta | <i>PAPPA2</i>   | 30.68814642 | 1.748838301  | 0.644150989 | 2.71495089   | 0.00662856  | 0.079812722 |
| Beta | <i>NPC2</i>     | 932.4855882 | 0.539021641  | 0.198573988 | 2.71446248   | 0.006638342 | 0.079849192 |
| Beta | <i>RGCC</i>     | 181.0517045 | -1.472264489 | 0.542452997 | -2.714086747 | 0.006645876 | 0.079858576 |
| Beta | <i>PARP4</i>    | 26.56933642 | 0.841427647  | 0.310062345 | 2.713736966  | 0.006652897 | 0.079861778 |
| Beta | <i>ONECUT2</i>  | 43.29775747 | 1.418159136  | 0.522680309 | 2.713243853  | 0.006662806 | 0.079899608 |
| Beta | <i>KRI1</i>     | 20.34542664 | 0.910809651  | 0.335996949 | 2.710767625  | 0.006712765 | 0.080417159 |
| Beta | <i>GINS2</i>    | 21.32648038 | -0.914603304 | 0.337652595 | -2.708711018 | 0.006754514 | 0.08074745  |
| Beta | <i>BTN2A1</i>   | 44.66413624 | 0.701172854  | 0.258861428 | 2.708680316  | 0.006755139 | 0.08074745  |
| Beta | <i>DCUN1D1</i>  | 107.70446   | 0.590422632  | 0.217996738 | 2.708401225  | 0.006760823 | 0.08074745  |
| Beta | <i>LARP7</i>    | 286.5839927 | 0.472609614  | 0.174542239 | 2.707709123  | 0.006774937 | 0.080834368 |
| Beta | <i>SLC25A4</i>  | 573.2220417 | -0.538556608 | 0.199032923 | -2.70586694  | 0.006812634 | 0.081088106 |
| Beta | <i>METTL4</i>   | 27.35301825 | 0.70906749   | 0.262064906 | 2.705694179  | 0.006816179 | 0.081088106 |
| Beta | <i>NADK</i>     | 50.23966808 | 0.574759969  | 0.212428357 | 2.705664994  | 0.006816778 | 0.081088106 |
| Beta | <i>RPF2</i>     | 84.58585723 | 0.602098261  | 0.222598283 | 2.704864809  | 0.006833219 | 0.081201995 |
| Beta | <i>LBR</i>      | 55.30654391 | 0.627554224  | 0.232058306 | 2.704295463  | 0.00684494  | 0.081259604 |
| Beta | <i>DTNB</i>     | 33.41115415 | 0.846792641  | 0.313414262 | 2.701831869  | 0.006895862 | 0.081658358 |
| Beta | <i>TAF1A</i>    | 9.583002998 | 1.04139469   | 0.385453629 | 2.701737934  | 0.006897811 | 0.081658358 |
| Beta | <i>INSR</i>     | 69.993215   | 0.830808842  | 0.307516923 | 2.701668688  | 0.006899247 | 0.081658358 |
| Beta | <i>LDLRAD3</i>  | 57.8836546  | 0.713059395  | 0.263993648 | 2.701047545  | 0.006912146 | 0.08172921  |
| Beta | <i>SLC25A33</i> | 156.3687519 | -0.65663843  | 0.243177184 | -2.700246871 | 0.006928804 | 0.081844335 |
| Beta | <i>RAD21</i>    | 268.1797016 | 0.530550986  | 0.196601305 | 2.698613759  | 0.006962894 | 0.081994512 |
| Beta | <i>CPNE4</i>    | 12.36650191 | 1.399030224  | 0.518494024 | 2.698257183  | 0.006970357 | 0.081994512 |
| Beta | <i>POU2F1</i>   | 88.0780022  | 0.815363402  | 0.302188154 | 2.698197767  | 0.006971601 | 0.081994512 |
| Beta | <i>SMURF2</i>   | 41.2273001  | 0.687723998  | 0.254893561 | 2.698083057  | 0.006974004 | 0.081994512 |
| Beta | <i>INTS6</i>    | 152.373001  | 0.73793617   | 0.273536048 | 2.697765712  | 0.006980655 | 0.081994512 |
| Beta | <i>RPL36AL</i>  | 3661.5529   | -0.440772327 | 0.163391347 | -2.69764792  | 0.006983125 | 0.081994512 |
| Beta | <i>C12orf60</i> | 13.80874551 | 0.98787723   | 0.366272621 | 2.697109129  | 0.006994434 | 0.082045826 |
| Beta | <i>ASAH1</i>    | 830.3933071 | 0.453952534  | 0.168364695 | 2.6962454    | 0.007012598 | 0.082162769 |
| Beta | <i>ENPP5</i>    | 112.489561  | 0.572658833  | 0.212412546 | 2.695974615  | 0.007018301 | 0.082162769 |
| Beta | <i>CD59</i>     | 1238.339336 | 0.471920497  | 0.175069614 | 2.695616252  | 0.007025856 | 0.082169849 |
| Beta | <i>ZNF281</i>   | 117.7625047 | 0.5881409    | 0.218223196 | 2.695134669  | 0.007036019 | 0.082207397 |
| Beta | <i>GPC6</i>     | 20.00995841 | 1.738743788  | 0.645233985 | 2.694749238  | 0.007044162 | 0.082221297 |
| Beta | <i>ITGB8</i>    | 19.70550381 | 0.967878086  | 0.359404124 | 2.693007735  | 0.007081063 | 0.082570498 |
| Beta | <i>CBX4</i>     | 109.6193839 | 0.581627779  | 0.21602952  | 2.692353291  | 0.007094974 | 0.082651208 |
| Beta | <i>ARFGEF1</i>  | 92.72236166 | 0.616929141  | 0.22918379  | 2.691853292  | 0.007105619 | 0.082693745 |
| Beta | <i>TCERG1</i>   | 99.83448686 | 0.660735731  | 0.24554769  | 2.690865184  | 0.007126699 | 0.082806587 |
| Beta | <i>FKBP11</i>   | 542.3588243 | -0.93242136  | 0.346555839 | -2.690537155 | 0.007133709 | 0.082806587 |
| Beta | <i>MYH10</i>    | 67.73034444 | 0.816237978  | 0.30338741  | 2.690414803  | 0.007136325 | 0.082806587 |
| Beta | <i>SMIM10L1</i> | 467.3310667 | -0.385497883 | 0.143315352 | -2.689857563 | 0.007148252 | 0.082831472 |
| Beta | <i>ZNF609</i>   | 55.28274167 | 0.84132587   | 0.312822605 | 2.68946635   | 0.007156636 | 0.082831472 |
| Beta | <i>SEC61A2</i>  | 30.69905533 | 0.74076557   | 0.275491172 | 2.68889041   | 0.007168995 | 0.082831472 |
| Beta | <i>VGF</i>      | 1726.388874 | 0.824969584  | 0.306826216 | 2.688719354  | 0.007172669 | 0.082831472 |
| Beta | <i>ZNF200</i>   | 17.55399611 | 0.722999201  | 0.268904807 | 2.68868084   | 0.007173497 | 0.082831472 |

|      |                    |             |              |             |              |             |             |
|------|--------------------|-------------|--------------|-------------|--------------|-------------|-------------|
| Beta | <i>ODC1</i>        | 457.110396  | -0.655741769 | 0.243970425 | -2.687792049 | 0.007192617 | 0.082948894 |
| Beta | <i>DDX59</i>       | 30.46760796 | 0.76234431   | 0.283657057 | 2.687556304  | 0.007197697 | 0.082948894 |
| Beta | <i>RAB30</i>       | 74.29637955 | 0.70151952   | 0.261062591 | 2.687169835  | 0.00720603  | 0.082964072 |
| Beta | <i>BAF1</i>        | 47.21300286 | 0.633955475  | 0.236009017 | 2.686149387  | 0.007228076 | 0.083033347 |
| Beta | <i>TBL2</i>        | 60.63927712 | 0.608084137  | 0.226430648 | 2.68552045   | 0.007241694 | 0.083033347 |
| Beta | <i>ACSL6</i>       | 12.94779677 | 1.056538393  | 0.393449126 | 2.685324029  | 0.007245952 | 0.083033347 |
| Beta | <i>CD82</i>        | 66.52624899 | -0.89417218  | 0.333040733 | -2.684873328 | 0.00725573  | 0.083033347 |
| Beta | <i>AC007613.1</i>  | 11.63250146 | 1.142758864  | 0.425728963 | 2.684240356  | 0.007269482 | 0.083033347 |
| Beta | <i>TMEM260</i>     | 21.47445646 | 0.923580833  | 0.34410779  | 2.683986998  | 0.007274994 | 0.083033347 |
| Beta | <i>THUMPD3-AS1</i> | 227.6491186 | 0.516953767  | 0.192633906 | 2.683607362  | 0.007283259 | 0.083033347 |
| Beta | <i>AC127502.2</i>  | 28.73011875 | 1.012461243  | 0.377290581 | 2.683505221  | 0.007285484 | 0.083033347 |
| Beta | <i>ZNF780B</i>     | 26.22187508 | 0.845643911  | 0.315128425 | 2.683489792  | 0.00728582  | 0.083033347 |
| Beta | <i>DET1</i>        | 12.19630923 | 1.131871317  | 0.421799737 | 2.683432959  | 0.007287058 | 0.083033347 |
| Beta | <i>CHCHD10</i>     | 655.2061441 | -0.647188127 | 0.241188388 | -2.683330376 | 0.007289294 | 0.083033347 |
| Beta | <i>CSTF2T</i>      | 36.54828597 | 0.65544103   | 0.244421166 | 2.68160504   | 0.007326991 | 0.083115919 |
| Beta | <i>DDIT4</i>       | 107.7013995 | 1.330189216  | 0.496048101 | 2.681573047  | 0.007327691 | 0.083115919 |
| Beta | <i>C12orf4</i>     | 27.11338278 | 0.718807358  | 0.268076278 | 2.681353843  | 0.007332494 | 0.083115919 |
| Beta | <i>SIN3A</i>       | 82.6181429  | 0.699334056  | 0.260841376 | 2.681070263  | 0.007338711 | 0.083115919 |
| Beta | <i>ARL6IP5</i>     | 608.5478307 | -0.404050397 | 0.150709107 | -2.680995233 | 0.007340356 | 0.083115919 |
| Beta | <i>ASXL3</i>       | 13.34380285 | 1.076008621  | 0.401371665 | 2.680828557  | 0.007344013 | 0.083115919 |
| Beta | <i>UFC1</i>        | 648.6794854 | -0.453065887 | 0.169047463 | -2.680110531 | 0.007359785 | 0.083115919 |
| Beta | <i>FBXO44</i>      | 65.83079098 | 0.576688776  | 0.215195246 | 2.679839763  | 0.007365741 | 0.083115919 |
| Beta | <i>KDM3B</i>       | 64.48086913 | 0.600951689  | 0.224258732 | 2.679724816  | 0.007368271 | 0.083115919 |
| Beta | <i>ARFGEF3</i>     | 499.9962615 | 0.672376708  | 0.250924586 | 2.679596763  | 0.00737109  | 0.083115919 |
| Beta | <i>RNF146</i>      | 97.571208   | 0.7653669    | 0.285641083 | 2.679470654  | 0.007373867 | 0.083115919 |
| Beta | <i>AC139795.2</i>  | 7.123100928 | 1.203767899  | 0.449354691 | 2.678881343  | 0.007386857 | 0.08315183  |
| Beta | <i>MID1</i>        | 37.67102828 | 1.086685835  | 0.40569647  | 2.678568622  | 0.007393758 | 0.08315183  |
| Beta | <i>PARN</i>        | 91.46638806 | 0.70188052   | 0.262055125 | 2.678369751  | 0.00739815  | 0.08315183  |
| Beta | <i>SPIN1</i>       | 179.2194333 | 0.659733328  | 0.246384179 | 2.677661081  | 0.007413819 | 0.083248814 |
| Beta | <i>ZNF786</i>      | 10.29395845 | 1.050226941  | 0.392350741 | 2.676755338  | 0.00743389  | 0.083394983 |
| Beta | <i>CDKN2A</i>      | 85.9244975  | 1.317723721  | 0.49245131  | 2.675845704  | 0.007454095 | 0.083542392 |
| Beta | <i>WRD89</i>       | 26.29973515 | 0.889032594  | 0.332458788 | 2.674113683  | 0.007492705 | 0.083846019 |
| Beta | <i>CCDC186</i>     | 314.0704972 | 0.478064954  | 0.178783552 | 2.673987335  | 0.007495528 | 0.083846019 |
| Beta | <i>IRAK4</i>       | 58.10776161 | 0.623322812  | 0.233147086 | 2.673517493  | 0.007506036 | 0.083846019 |
| Beta | <i>TMCO3</i>       | 453.9993878 | -0.55998833  | 0.209469819 | -2.673360454 | 0.007509551 | 0.083846019 |
| Beta | <i>NPIP85</i>      | 28.13700153 | 0.883427322  | 0.330781486 | 2.670727833  | 0.007568699 | 0.084380285 |
| Beta | <i>GUF1</i>        | 42.90122146 | 0.813011723  | 0.304459234 | 2.67034674   | 0.007577295 | 0.084380285 |
| Beta | <i>NCBP3</i>       | 126.3445595 | 0.526886188  | 0.197314989 | 2.67027959   | 0.007578811 | 0.084380285 |
| Beta | <i>AL136169.1</i>  | 16.40142968 | 1.051932     | 0.394019884 | 2.669743441  | 0.007590922 | 0.084408729 |
| Beta | <i>TRIM35</i>      | 15.07554407 | 0.705277351  | 0.264250179 | 2.668975873  | 0.007608292 | 0.084408729 |
| Beta | <i>LINC02193</i>   | 16.54358723 | 1.249955179  | 0.468338825 | 2.668912144  | 0.007609735 | 0.084408729 |
| Beta | <i>NHLRC3</i>      | 138.8761918 | 0.631087167  | 0.236459303 | 2.668903947  | 0.007609921 | 0.084408729 |
| Beta | <i>RNF213</i>      | 66.50841563 | 0.775205946  | 0.29052596  | 2.668284604  | 0.007623965 | 0.084485246 |
| Beta | <i>ATE1</i>        | 103.123155  | 0.670051891  | 0.251262929 | 2.666735973  | 0.007659182 | 0.084796034 |
| Beta | <i>NDUFC1</i>      | 1121.62362  | 0.36182369   | 0.135743369 | 2.665498084  | 0.007687437 | 0.085029237 |
| Beta | <i>RPP14</i>       | 71.62986809 | 0.669947515  | 0.2513788   | 2.665091547  | 0.007696737 | 0.085052537 |
| Beta | <i>HIVEP2</i>      | 87.48351815 | 0.912758238  | 0.342585515 | 2.664322328  | 0.007714361 | 0.085136596 |
| Beta | <i>FXYD2</i>       | 6328.117537 | -0.767268945 | 0.288006238 | -2.66407058  | 0.007720136 | 0.085136596 |
| Beta | <i>KLF5</i>        | 8.798951067 | 1.413932863  | 0.530791924 | 2.663817586  | 0.007725945 | 0.085136596 |
| Beta | <i>CLSTN3</i>      | 52.36771883 | 0.735070373  | 0.276025617 | 2.663051276  | 0.007743561 | 0.085178312 |
| Beta | <i>MPP1</i>        | 97.62732339 | -0.594160622 | 0.223172485 | -2.662338152 | 0.007759988 | 0.085178312 |
| Beta | <i>EIF2B1</i>      | 88.38127653 | 0.457609799  | 0.171924423 | 2.661691644  | 0.007774907 | 0.085178312 |
| Beta | <i>ZNF524</i>      | 74.20794887 | -0.653567733 | 0.245561628 | -2.66152224  | 0.00777882  | 0.085178312 |
| Beta | <i>AC132872.1</i>  | 21.22386486 | 1.138645319  | 0.427840077 | 2.661380687  | 0.007782092 | 0.085178312 |
| Beta | <i>MPC2</i>        | 1236.687668 | -0.383212718 | 0.14399418  | -2.661306988 | 0.007783795 | 0.085178312 |
| Beta | <i>ALS2</i>        | 34.60511693 | 0.647530692  | 0.243339618 | 2.661016304  | 0.007790518 | 0.085178312 |
| Beta | <i>PDS5B</i>       | 109.2123882 | 0.626961264  | 0.235614941 | 2.660957159  | 0.007791887 | 0.085178312 |
| Beta | <i>KDM4B</i>       | 53.99641172 | 0.637002785  | 0.239423275 | 2.660571684  | 0.007800812 | 0.085178312 |
| Beta | <i>SGSH</i>        | 21.24680699 | 0.830384222  | 0.312112286 | 2.660530391  | 0.007801769 | 0.085178312 |
| Beta | <i>TMEM63B</i>     | 33.52446705 | 0.67702678   | 0.254523563 | 2.659976828  | 0.007814603 | 0.085239726 |
| Beta | <i>PHLDA2</i>      | 26.41546006 | -1.166075814 | 0.438469774 | -2.659421207 | 0.007827504 | 0.085278497 |
| Beta | <i>SPPL2B</i>      | 62.14840602 | 0.528058632  | 0.198577802 | 2.65920272   | 0.007832582 | 0.085278497 |
| Beta | <i>LIG4</i>        | 54.79771216 | 0.721367095  | 0.271380735 | 2.658136717  | 0.007857401 | 0.085470019 |
| Beta | <i>USP15</i>       | 140.4022058 | 0.541791849  | 0.203861245 | 2.65765006   | 0.007868755 | 0.085514853 |
| Beta | <i>GLRA3</i>       | 13.85837341 | 1.217767944  | 0.458347108 | 2.65686839   | 0.007887023 | 0.085634671 |
| Beta | <i>WASHC2A</i>     | 66.53637653 | 0.556679222  | 0.209669923 | 2.655026599  | 0.007930216 | 0.086001163 |
| Beta | <i>KDM6B</i>       | 170.2708041 | 0.793693971  | 0.298964581 | 2.654809368  | 0.007935324 | 0.086001163 |
| Beta | <i>RMDN1</i>       | 57.96081146 | 0.726373185  | 0.273721782 | 2.653691568  | 0.007961656 | 0.086207532 |
| Beta | <i>NAA40</i>       | 36.60770172 | 0.711241443  | 0.268113948 | 2.652758086  | 0.007983707 | 0.086367199 |
| Beta | <i>DGKH</i>        | 16.36014581 | 1.170772814  | 0.441638892 | 2.650973082  | 0.008026024 | 0.086619608 |
| Beta | <i>BCL3</i>        | 30.53293809 | 1.251870324  | 0.472288931 | 2.650645064  | 0.008033822 | 0.086619608 |
| Beta | <i>SEC24B</i>      | 59.07362941 | 0.603579783  | 0.227717388 | 2.650565192  | 0.008035722 | 0.086619608 |
| Beta | <i>ARIH2</i>       | 224.6680495 | 0.489490412  | 0.184675793 | 2.650539112  | 0.008036342 | 0.086619608 |



|      |             |             |              |             |              |             |             |
|------|-------------|-------------|--------------|-------------|--------------|-------------|-------------|
| Beta | PELI1       | 54.977041   | 0.743779964  | 0.280661206 | 2.65009894   | 0.00804682  | 0.086653554 |
| Beta | PUS3        | 110.9426302 | 0.490798373  | 0.185241323 | 2.649508031  | 0.008060906 | 0.08672625  |
| Beta | SEPSECS-AS1 | 11.89000958 | 1.006696135  | 0.380140673 | 2.648220008  | 0.008091685 | 0.086854294 |
| Beta | ANKS1B      | 25.17528104 | 1.207166402  | 0.455866263 | 2.648071377  | 0.008095243 | 0.086854294 |
| Beta | GOT2        | 147.5573815 | 0.501961694  | 0.189567137 | 2.647936249  | 0.00809848  | 0.086854294 |
| Beta | LPXN        | 15.98591858 | 1.015337119  | 0.383497602 | 2.647570975  | 0.008107234 | 0.086854294 |
| Beta | ADD3        | 41.00865146 | 0.821233078  | 0.310194835 | 2.647475026  | 0.008109535 | 0.086854294 |
| Beta | VPS54       | 55.55859674 | 0.619189418  | 0.234078747 | 2.645218434  | 0.00816382  | 0.087295545 |
| Beta | MBTD1       | 22.0163724  | 0.759797269  | 0.287272216 | 2.644868614  | 0.008172264 | 0.087295545 |
| Beta | SPECC1L     | 131.5775266 | 0.658820971  | 0.249096439 | 2.644842992  | 0.008172883 | 0.087295545 |
| Beta | TNRC6B      | 441.7863648 | 0.74697366   | 0.282673525 | 2.642531379  | 0.008228884 | 0.087814372 |
| Beta | RNF24       | 18.49606606 | 0.902700328  | 0.341644293 | 2.642222762  | 0.008236386 | 0.087815179 |
| Beta | FUT10       | 10.26908382 | 1.05708024   | 0.400197693 | 2.641395137  | 0.008256536 | 0.087950706 |
| Beta | CCDC14      | 36.91710134 | 0.833629954  | 0.315712354 | 2.640473022  | 0.008279038 | 0.087973328 |
| Beta | SLCOSA1     | 82.80316868 | 0.71368681   | 0.270302351 | 2.640327791  | 0.008282587 | 0.087973328 |
| Beta | HIST3H2A    | 266.3142464 | -0.694804291 | 0.263154618 | -2.640289181 | 0.008283531 | 0.087973328 |
| Beta | ZNF671      | 22.11535119 | 0.737875784  | 0.279488959 | 2.640089204  | 0.008288421 | 0.087973328 |
| Beta | ZNF782      | 13.53681301 | 0.934233146  | 0.353961315 | 2.639365108  | 0.008306147 | 0.088021055 |
| Beta | L3MBTL1     | 38.29868507 | 0.717092666  | 0.271698317 | 2.639297419  | 0.008307806 | 0.088021055 |
| Beta | RANBP3      | 64.59426698 | 0.523234844  | 0.19827601  | 2.638921588  | 0.008317022 | 0.088039806 |
| Beta | HMG20A      | 74.82670237 | 0.730458653  | 0.276918273 | 2.637813118  | 0.008344255 | 0.088249082 |
| Beta | ZNF813      | 13.66102594 | 0.911920994  | 0.345780686 | 2.637281467  | 0.008357345 | 0.088308537 |
| Beta | AC025580.3  | 6.805944105 | 1.388699645  | 0.526675421 | 2.636727649  | 0.008371001 | 0.088373854 |
| Beta | AC135050.6  | 17.16435144 | 0.952850466  | 0.361433838 | 2.636306746  | 0.008381393 | 0.088404627 |
| Beta | MIR100HG    | 25.9068295  | 0.926905846  | 0.351725279 | 2.635311996  | 0.008405998 | 0.088519861 |
| Beta | TKFC        | 32.50921105 | 0.686028196  | 0.260326589 | 2.635259803  | 0.008407291 | 0.088519861 |
| Beta | AC239868.1  | 13.58279552 | 1.001919115  | 0.380295655 | 2.63457944   | 0.008424159 | 0.088564078 |
| Beta | PACRGL      | 42.69893825 | 0.622072017  | 0.236126496 | 2.634486294  | 0.008426471 | 0.088564078 |
| Beta | TRIM56      | 111.6128315 | 0.747463196  | 0.283799064 | 2.633776112  | 0.008444115 | 0.088670704 |
| Beta | GATC        | 71.66573929 | 0.665705371  | 0.252805309 | 2.633272903  | 0.008456637 | 0.088723401 |
| Beta | APIP        | 102.9672315 | 0.610896965  | 0.232033831 | 2.632792655  | 0.008468603 | 0.088770178 |
| Beta | LIMCH1      | 235.6222045 | 0.695764268  | 0.264320835 | 2.632271758  | 0.008481599 | 0.088827659 |
| Beta | COP1        | 52.85563562 | 0.604397657  | 0.229649029 | 2.631831971  | 0.008492585 | 0.088860306 |
| Beta | BTRC        | 41.82399378 | 0.819679293  | 0.311482082 | 2.63154557   | 0.008499747 | 0.088860306 |
| Beta | MYBBP1A     | 21.19250303 | 0.764499213  | 0.290547007 | 2.631241059  | 0.008507367 | 0.088861402 |
| Beta | DNAJB9      | 896.8357041 | -0.677304525 | 0.257439257 | -2.630929457 | 0.008515171 | 0.088864414 |
| Beta | MEIS2       | 897.414402  | 0.651547127  | 0.247818009 | 2.629135503  | 0.008560224 | 0.089183068 |
| Beta | CEP170      | 71.4725156  | 0.676210162  | 0.257201219 | 2.629109477  | 0.00856088  | 0.089183068 |
| Beta | DDX60L      | 7.887305254 | 1.262051493  | 0.480084065 | 2.628813544  | 0.008568333 | 0.089183068 |
| Beta | RANBP2      | 218.738123  | 0.503496061  | 0.19161013  | 2.627711108  | 0.008596149 | 0.089393903 |
| Beta | MROH8       | 83.82830435 | 1.564068482  | 0.59541648  | 2.626847818  | 0.008617987 | 0.089470633 |
| Beta | SEMA4B      | 26.17502028 | 0.83541057   | 0.318031001 | 2.62682118   | 0.008618661 | 0.089470633 |
| Beta | CREBRF      | 400.5307335 | 0.667277605  | 0.254119031 | 2.625846642  | 0.008643375 | 0.089500239 |
| Beta | PALB2       | 22.87500025 | 0.832157887  | 0.316910823 | 2.625842431  | 0.008643482 | 0.089500239 |
| Beta | STRN        | 54.93560226 | 0.657888066  | 0.250546397 | 2.625813313  | 0.008644221 | 0.089500239 |
| Beta | LARP6       | 219.7655238 | 0.727028202  | 0.277013965 | 2.624518235  | 0.008677165 | 0.089762725 |
| Beta | ERN1        | 84.52764041 | 0.611168165  | 0.232913973 | 2.624008161  | 0.00869017  | 0.089818683 |
| Beta | MZT2A       | 591.9253893 | -0.545456614 | 0.208018576 | -2.622153395 | 0.008737609 | 0.090090421 |
| Beta | AC090515.2  | 8.520354664 | 1.143585378  | 0.436226073 | 2.621542933  | 0.008753274 | 0.090090421 |
| Beta | ZNF318      | 66.8256531  | 0.781816443  | 0.298227824 | 2.621540922  | 0.008753325 | 0.090090421 |
| Beta | FICD        | 188.3580664 | -0.595688073 | 0.227230088 | -2.621519348 | 0.008753879 | 0.090090421 |
| Beta | MAP3K5      | 11.81091376 | 1.0006719    | 0.381781865 | 2.621056657  | 0.008765769 | 0.090090421 |
| Beta | PIGP        | 459.6487142 | -0.569876239 | 0.217426838 | -2.621002282 | 0.008767168 | 0.090090421 |
| Beta | TMEM161B    | 53.53906589 | 0.638312706  | 0.243570961 | 2.620643708  | 0.008776393 | 0.090090421 |
| Beta | USP24       | 40.21933413 | 0.744685932  | 0.284167349 | 2.620589364  | 0.008777792 | 0.090090421 |
| Beta | CRTC2       | 63.89598307 | 0.853323439  | 0.325730544 | 2.619721895  | 0.00880015  | 0.090090421 |
| Beta | ERBIN       | 54.56710814 | 0.667912444  | 0.254963535 | 2.619639096  | 0.008802287 | 0.090090421 |
| Beta | TMEM189     | 65.48185031 | -0.565308178 | 0.215861916 | -2.61884166  | 0.008822889 | 0.090090421 |
| Beta | SNHG10      | 124.6832454 | 0.69043674   | 0.263648197 | 2.618780437  | 0.008824473 | 0.090090421 |
| Beta | MRPL41      | 742.6266999 | -0.428099004 | 0.163477817 | -2.618697822 | 0.00882661  | 0.090090421 |
| Beta | MICALL1     | 11.83638152 | 0.9335161    | 0.356507452 | 2.618503751  | 0.008831632 | 0.090090421 |
| Beta | YY1         | 402.3203151 | 0.456058148  | 0.174170426 | 2.618459156  | 0.008832787 | 0.090090421 |
| Beta | GIGYF2      | 150.9454629 | 0.64675703   | 0.247019432 | 2.618243536  | 0.00883837  | 0.090090421 |
| Beta | AC092747.4  | 30.3290263  | 0.944561737  | 0.360900995 | 2.617232289  | 0.008864599 | 0.090265708 |
| Beta | LEPR        | 28.45693288 | 1.460174464  | 0.557959028 | 2.616992271  | 0.008870835 | 0.090265708 |
| Beta | FBXL2       | 22.37150134 | 0.778086109  | 0.297454681 | 2.61581397   | 0.008901504 | 0.090473555 |
| Beta | BMPR2       | 100.158212  | 0.632039462  | 0.241655487 | 2.6154567    | 0.008910822 | 0.090473555 |
| Beta | KBTD6       | 47.43452425 | 0.642372138  | 0.245636565 | 2.615132397  | 0.008919287 | 0.090473555 |
| Beta | SLC22A23    | 6.369078086 | 1.139112192  | 0.43560136  | 2.615033598  | 0.008921868 | 0.090473555 |
| Beta | AAR2        | 35.48983806 | 0.555406127  | 0.212417403 | 2.614692205  | 0.00893079  | 0.090486423 |
| Beta | SLC8A1      | 81.82626947 | 0.969406134  | 0.370826088 | 2.61417998   | 0.008944191 | 0.090528763 |
| Beta | SUPT16H     | 251.1867636 | 0.544727217  | 0.208392569 | 2.613947414  | 0.008950281 | 0.090528763 |
| Beta | MAD2L1BP    | 47.48091313 | 0.626730896  | 0.23986661  | 2.612830926  | 0.008979571 | 0.090702173 |

|      |             |             |              |             |              |             |             |
|------|-------------|-------------|--------------|-------------|--------------|-------------|-------------|
| Beta | ISY1        | 94.43027165 | 0.406683269  | 0.155673344 | 2.612414291  | 0.008990523 | 0.090702173 |
| Beta | GEMIN2      | 32.09623391 | 0.718716453  | 0.275135067 | 2.612231367  | 0.008995335 | 0.090702173 |
| Beta | IRS1        | 10.42859954 | 1.140947289  | 0.436822814 | 2.61192239   | 0.009003469 | 0.090702173 |
| Beta | EBPL        | 145.9501688 | -0.7070403   | 0.270724643 | -2.611658445 | 0.009010422 | 0.090702173 |
| Beta | TICAM2      | 41.75734321 | -0.694708239 | 0.266014422 | -2.611543511 | 0.009013452 | 0.090702173 |
| Beta | DANCR       | 731.8510018 | -0.523969721 | 0.200677212 | -2.61100758  | 0.009027589 | 0.090702961 |
| Beta | BRPF1       | 29.71110592 | 0.62284752   | 0.238573974 | 2.610710252  | 0.009035441 | 0.090702961 |
| Beta | GTF2H2C     | 27.48421266 | 0.671574822  | 0.25724247  | 2.610668536  | 0.009036543 | 0.090702961 |
| Beta | ZNF532      | 11.51046145 | 1.102080623  | 0.422307036 | 2.609666732  | 0.009063047 | 0.090783709 |
| Beta | CCDC152     | 18.1097283  | 1.093620443  | 0.419085555 | 2.609539816  | 0.009066409 | 0.090783709 |
| Beta | STUB1       | 833.5188485 | -0.419387745 | 0.160716114 | -2.60949407  | 0.009067622 | 0.090783709 |
| Beta | TCEANC2     | 8.751711077 | 1.200547474  | 0.460130012 | 2.609148377  | 0.009076788 | 0.090798593 |
| Beta | IL13RA2     | 18.44004704 | 1.962111232  | 0.752204733 | 2.608480306  | 0.009094524 | 0.090869275 |
| Beta | UBXN2A      | 99.17646293 | 0.709515813  | 0.272021953 | 2.6083035    | 0.009099224 | 0.090869275 |
| Beta | GATM        | 11.34284892 | 1.640055094  | 0.628970204 | 2.607524304  | 0.00911996  | 0.090999496 |
| Beta | ATXN7L3     | 36.7062034  | 0.783701674  | 0.300666196 | 2.60655067   | 0.009145929 | 0.091131018 |
| Beta | RWDD4       | 222.1491685 | -0.421994912 | 0.161903943 | -2.606452343 | 0.009148555 | 0.091131018 |
| Beta | RBM12       | 98.78610439 | 0.564398568  | 0.216646536 | 2.605158512  | 0.009183176 | 0.091398887 |
| Beta | CFL2        | 221.9802276 | 0.55768903   | 0.214156025 | 2.604124866  | 0.009210919 | 0.091597905 |
| Beta | DESI1       | 55.48999584 | 0.631221763  | 0.24249704  | 2.603008112  | 0.009240977 | 0.091727765 |
| Beta | LIAS        | 69.20966299 | 0.630664759  | 0.242300293 | 2.602822938  | 0.009245969 | 0.091727765 |
| Beta | SNURF       | 17.50571461 | 1.169836215  | 0.449457226 | 2.602775407  | 0.009247251 | 0.091727765 |
| Beta | FBLN7       | 22.9094407  | 0.813656451  | 0.312873661 | 2.600591073  | 0.009306331 | 0.092173555 |
| Beta | ZNF696      | 9.105519999 | 0.927757056  | 0.356755876 | 2.600537561  | 0.009307783 | 0.092173555 |
| Beta | SMCR8       | 50.54296329 | 0.691750486  | 0.266042261 | 2.600152631  | 0.009318231 | 0.092185311 |
| Beta | RPL12       | 12071.83078 | -0.428344851 | 0.16475312  | -2.599919509 | 0.009324563 | 0.092185311 |
| Beta | CLHC1       | 24.90611692 | 0.585639366  | 0.225347983 | 2.598822316  | 0.009354418 | 0.092250293 |
| Beta | NTAN1       | 58.41966509 | -0.665541755 | 0.256098635 | -2.598771196 | 0.009355811 | 0.092250293 |
| Beta | TNRC6A      | 394.0279999 | 0.776331076  | 0.298754207 | 2.598561149  | 0.009361537 | 0.092250293 |
| Beta | FAM155A-IT1 | 8.548170245 | 1.132369675  | 0.435772915 | 2.598531567  | 0.009362344 | 0.092250293 |
| Beta | PLEKHA7     | 5.602389101 | 1.243252853  | 0.478817582 | 2.596506269  | 0.009417719 | 0.092589498 |
| Beta | CHCHD2      | 3081.240637 | -0.33581039  | 0.1293335   | -2.596468736 | 0.009418748 | 0.092589498 |
| Beta | PANX2       | 30.4409594  | 0.864562813  | 0.332997818 | 2.596301735  | 0.009423327 | 0.092589498 |
| Beta | GC          | 184.0645387 | 1.971598502  | 0.759499486 | 2.595918154  | 0.009433853 | 0.092589498 |
| Beta | GSE1        | 142.254955  | 0.555827381  | 0.214122126 | 2.595842808  | 0.009435922 | 0.092589498 |
| Beta | AC092171.4  | 11.26104161 | 1.164503131  | 0.448874729 | 2.59427198   | 0.009479147 | 0.09293651  |
| Beta | HADH        | 1017.59601  | -0.776876055 | 0.299560333 | -2.593387608 | 0.00950356  | 0.09297703  |
| Beta | XPA         | 182.9928418 | 0.444383799  | 0.171354564 | 2.593358403  | 0.009504367 | 0.09297703  |
| Beta | PSMB7       | 661.4587282 | -0.432685236 | 0.16684942  | -2.593267846 | 0.00950687  | 0.09297703  |
| Beta | PDP1        | 17.96498374 | 0.950477259  | 0.366798986 | 2.59127559   | 0.009562088 | 0.093419189 |
| Beta | ATP5PO      | 833.1664713 | -0.363110729 | 0.14015167  | -2.590841255 | 0.009574164 | 0.093419189 |
| Beta | EPS15       | 130.9046997 | 0.515790106  | 0.199086565 | 2.590783083  | 0.009575783 | 0.093419189 |
| Beta | DDX31       | 40.92711086 | 0.727289627  | 0.280960199 | 2.588585959  | 0.009637089 | 0.09393977  |
| Beta | MTMR3       | 95.67123874 | 0.548213466  | 0.211851063 | 2.587730543  | 0.009661052 | 0.094092344 |
| Beta | COL6A1      | 40.59849495 | 0.777790691  | 0.300602101 | 2.587442633  | 0.009669129 | 0.094092344 |
| Beta | AC103691.1  | 7.485323446 | 1.176285519  | 0.454660026 | 2.587176025  | 0.009676614 | 0.094092344 |
| Beta | APOH        | 64.12564071 | 1.850363854  | 0.715648132 | 2.585577704  | 0.009721596 | 0.094452053 |
| Beta | ALG10B      | 38.80299144 | 0.804746977  | 0.311287489 | 2.585221077  | 0.009731658 | 0.094472184 |
| Beta | TASOR       | 86.60358391 | 0.667615504  | 0.258410567 | 2.583545683  | 0.009779052 | 0.094854393 |
| Beta | ETV7        | 15.86622321 | 1.303791537  | 0.504762993 | 2.582977668  | 0.009795166 | 0.09492132  |
| Beta | EFNB3       | 37.47832198 | 1.042322388  | 0.403572826 | 2.582736797  | 0.009802007 | 0.09492132  |
| Beta | CCDC167     | 93.67695693 | -0.855750974 | 0.33154785  | -2.581078344 | 0.009849223 | 0.095300499 |
| Beta | SMAD5       | 247.2656713 | 0.521848327  | 0.202294699 | 2.579644108  | 0.009890218 | 0.09550155  |
| Beta | AC015849.4  | 4.889183402 | 1.350311647  | 0.523467822 | 2.579550435  | 0.009892901 | 0.09550155  |
| Beta | KLHL21      | 36.13641238 | 0.706240897  | 0.27378942  | 2.579503975  | 0.009894232 | 0.09550155  |
| Beta | HECA        | 61.43448357 | 0.768703122  | 0.298086692 | 2.578790472  | 0.00991469  | 0.095620962 |
| Beta | GCA7        | 34.92655346 | -0.985761338 | 0.382314387 | -2.578405027 | 0.009925758 | 0.095643854 |
| Beta | ATN1        | 178.4176773 | 0.554426354  | 0.215063033 | 2.57797143   | 0.009938221 | 0.095643854 |
| Beta | FASTKD3     | 27.66742412 | 0.818273321  | 0.317488841 | 2.577329388  | 0.009956702 | 0.095643854 |
| Beta | SNX3        | 979.0259396 | -0.406412266 | 0.157695532 | -2.57719582  | 0.009960551 | 0.095643854 |
| Beta | JUN         | 2302.391034 | -1.079821064 | 0.419020208 | -2.577014287 | 0.009965783 | 0.095643854 |
| Beta | HPSE        | 7.043255973 | 1.138904301  | 0.441956272 | 2.576961505  | 0.009967305 | 0.095643854 |
| Beta | THBD        | 28.39097614 | 1.159417504  | 0.449955133 | 2.576740252  | 0.009973687 | 0.095643854 |
| Beta | LDB1        | 41.61307989 | 0.879586194  | 0.341467882 | 2.575897301  | 0.009998034 | 0.095646057 |
| Beta | SLC38A4     | 17.97988775 | 1.287040995  | 0.499648267 | 2.575894045  | 0.009998128 | 0.095646057 |
| Beta | PLCL2       | 76.59031628 | 0.877468345  | 0.340646389 | 2.575892109  | 0.009998184 | 0.095646057 |
| Beta | COX5A       | 731.6043247 | -0.431415254 | 0.167527    | -2.575198348 | 0.010018262 | 0.095760652 |
| Beta | CACYBP      | 388.8889053 | -0.576672655 | 0.224146786 | -2.572745592 | 0.010089534 | 0.096222458 |
| Beta | RNF182      | 11.81211174 | 1.151679582  | 0.447649705 | 2.572724985  | 0.010090135 | 0.096222458 |
| Beta | THRB        | 20.94171257 | 1.053749808  | 0.409624794 | 2.572475651  | 0.010097406 | 0.096222458 |
| Beta | CYTOR       | 96.12350468 | -0.852298061 | 0.331424564 | -2.57162007  | 0.010122391 | 0.096222458 |
| Beta | BRX1        | 118.9405338 | 0.483081198  | 0.18787707  | 2.571262146  | 0.010132859 | 0.096222458 |
| Beta | C6orf62     | 175.6964611 | 0.543488219  | 0.211375067 | 2.571203053  | 0.010134589 | 0.096222458 |

|               |                   |             |              |             |              |             |             |
|---------------|-------------------|-------------|--------------|-------------|--------------|-------------|-------------|
| Beta          | <i>MTX1</i>       | 199.9180578 | -0.456535182 | 0.17758306  | -2.570826193 | 0.010145623 | 0.096222458 |
| Beta          | <i>CZCD5</i>      | 34.17268335 | 0.717530066  | 0.279122473 | 2.570663903  | 0.010150378 | 0.096222458 |
| Beta          | <i>PIGZ</i>       | 42.90824636 | -0.649085503 | 0.252502657 | -2.570608603 | 0.010151999 | 0.096222458 |
| Beta          | <i>RAPGEF6</i>    | 58.41110009 | 0.650832445  | 0.253187181 | 2.570558439  | 0.010153469 | 0.096222458 |
| Beta          | <i>PDZD2</i>      | 93.23612981 | -0.793082622 | 0.308555859 | -2.570304853 | 0.010160906 | 0.096222458 |
| Beta          | <i>ZNF511</i>     | 184.1767535 | -0.615718476 | 0.239561318 | -2.570191554 | 0.01016423  | 0.096222458 |
| Beta          | <i>MYCBP2-AS1</i> | 6.932930611 | 1.484752985  | 0.577853793 | 2.569426735  | 0.010186693 | 0.096357966 |
| Beta          | <i>RIPK1</i>      | 60.93071831 | 0.793565838  | 0.309001736 | 2.568159802  | 0.010224001 | 0.096588945 |
| Beta          | <i>LINC02106</i>  | 34.27786602 | 0.88517703   | 0.344716919 | 2.567837493  | 0.010233512 | 0.096588945 |
| Beta          | <i>RBBP4</i>      | 245.4586735 | 0.599482477  | 0.233464592 | 2.567766151  | 0.010235618 | 0.096588945 |
| Beta          | <i>TIA1</i>       | 79.24276808 | 0.49539011   | 0.19298131  | 2.567036732  | 0.010257175 | 0.09664836  |
| Beta          | <i>MIER3</i>      | 42.73881838 | 0.682707389  | 0.265955356 | 2.566999967  | 0.010258262 | 0.09664836  |
| Beta          | <i>PHF12</i>      | 66.83514328 | 0.614887375  | 0.239590054 | 2.566414447  | 0.010275597 | 0.096655666 |
| Beta          | <i>SAMD4A</i>     | 31.50989262 | 1.044250012  | 0.406911608 | 2.566282191  | 0.010279516 | 0.096655666 |
| Beta          | <i>AC007325.4</i> | 57.76225217 | -0.895116276 | 0.348872533 | -2.565740181 | 0.010295592 | 0.096655666 |
| Beta          | <i>C10orf88</i>   | 30.89305793 | 0.731333103  | 0.285038241 | 2.565736795  | 0.010295692 | 0.096655666 |
| Beta          | <i>AP3B1</i>      | 209.9314615 | 0.551339915  | 0.2149131   | 2.565408597  | 0.010305437 | 0.096655666 |
| Beta          | <i>GTPBP4</i>     | 130.1696233 | 0.488202993  | 0.190308848 | 2.565319466  | 0.010308085 | 0.096655666 |
| Beta          | <i>NSIP</i>       | 142.2093247 | -0.453812621 | 0.176950888 | -2.564624719 | 0.010328745 | 0.096712012 |
| Beta          | <i>AC009061.2</i> | 15.22697594 | 0.842071076  | 0.328404818 | 2.564125216  | 0.010343622 | 0.096712012 |
| Beta          | <i>SH2B3</i>      | 18.67444755 | 0.856029184  | 0.333860874 | 2.564029665  | 0.01034647  | 0.096712012 |
| Beta          | <i>N4BP2</i>      | 110.8031392 | 0.686742373  | 0.267838335 | 2.564018225  | 0.010346811 | 0.096712012 |
| Beta          | <i>AL355999.1</i> | 12.56568957 | 0.802523639  | 0.313215387 | 2.562210133  | 0.010400837 | 0.097140201 |
| Beta          | <i>NEUROD1</i>    | 521.6969267 | 0.735199932  | 0.287153687 | 2.560301208  | 0.010458148 | 0.097527454 |
| Beta          | <i>LRP6</i>       | 57.45740611 | 0.59854791   | 0.23378224  | 2.560279646  | 0.010458797 | 0.097527454 |
| Beta          | <i>SENP5</i>      | 134.624475  | 0.860517948  | 0.336152266 | 2.559905242  | 0.010470071 | 0.097546277 |
| Beta          | <i>CPSF2</i>      | 86.43324081 | 0.677440159  | 0.26465971  | 2.559664855  | 0.010477315 | 0.097546277 |
| Beta          | <i>EFTUD2</i>     | 39.02423581 | 0.598452284  | 0.23383423  | 2.559301457  | 0.010488275 | 0.097565208 |
| Beta          | <i>FKBP14</i>     | 64.74044615 | 0.65116604   | 0.254456118 | 2.559050438  | 0.010495851 | 0.097565208 |
| Beta          | <i>NDRG1</i>      | 45.66709848 | -0.902803357 | 0.352957607 | -2.557823773 | 0.010532945 | 0.097825112 |
| Beta          | <i>PRRT2</i>      | 9.932755521 | 0.951547241  | 0.372108809 | 2.557174724  | 0.01055262  | 0.097825112 |
| Beta          | <i>ERCC5</i>      | 94.14579499 | 0.607680541  | 0.237647119 | 2.557070933  | 0.010555769 | 0.097825112 |
| Beta          | <i>HPS3</i>       | 57.37491057 | 0.610630275  | 0.238804174 | 2.557033505  | 0.010556905 | 0.097825112 |
| Beta          | <i>AC018926.2</i> | 8.957512157 | 1.293613124  | 0.506030991 | 2.556391107  | 0.010576417 | 0.097929172 |
| Beta          | <i>POLDIP3</i>    | 53.06522623 | 0.532474487  | 0.208343315 | 2.555755092  | 0.010595767 | 0.09801452  |
| Beta          | <i>SKIL</i>       | 153.8325481 | 0.675421314  | 0.264304059 | 2.555470835  | 0.010604425 | 0.09801452  |
| Beta          | <i>SENP1</i>      | 46.34416583 | 0.612933684  | 0.239870286 | 2.555271407  | 0.010610503 | 0.09801452  |
| Beta          | <i>NAA16</i>      | 69.23626385 | 0.644596482  | 0.252323079 | 2.554647335  | 0.010629543 | 0.098017926 |
| Beta          | <i>TOP2B</i>      | 125.3211402 | 0.596779974  | 0.233669934 | 2.553944204  | 0.010651032 | 0.098017926 |
| Beta          | <i>ALKBH8</i>     | 7.718531535 | 0.989198311  | 0.387324594 | 2.553925896  | 0.010651592 | 0.098017926 |
| Beta          | <i>USP30</i>      | 57.11495858 | 0.596974321  | 0.233768516 | 2.553698555  | 0.010658549 | 0.098017926 |
| Beta          | <i>NTRK2</i>      | 12.15133003 | 1.474692784  | 0.577481447 | 2.55366262   | 0.010659649 | 0.098017926 |
| Beta          | <i>ELF2</i>       | 184.4207777 | 0.491550469  | 0.192490781 | 2.553631223  | 0.01066061  | 0.098017926 |
| Beta          | <i>NAPEPLD</i>    | 17.70207205 | 0.873530053  | 0.34212879  | 2.553219951  | 0.010673207 | 0.098057499 |
| Beta          | <i>TAOK2</i>      | 38.68730626 | 0.677116093  | 0.265295458 | 2.55230941   | 0.010701144 | 0.098237831 |
| Beta          | <i>RPS3</i>       | 14532.42193 | -0.389192916 | 0.152516219 | -2.551813305 | 0.010716393 | 0.098301493 |
| Beta          | <i>AC006141.1</i> | 21.79587338 | 0.80134416   | 0.314082622 | 2.551380122  | 0.010729723 | 0.098347476 |
| Beta          | <i>MPP5</i>       | 81.49313311 | 0.653389705  | 0.256205316 | 2.550258184  | 0.010764317 | 0.098588136 |
| Beta          | <i>BORCS7</i>     | 432.7457067 | -0.462541031 | 0.181467883 | -2.548886467 | 0.010806748 | 0.098841895 |
| Beta          | <i>DENND11</i>    | 47.82728599 | 0.691832952  | 0.271454552 | 2.548614292  | 0.010815184 | 0.098841895 |
| Beta          | <i>TRIOBP</i>     | 20.53348525 | 0.767726026  | 0.301240033 | 2.548552454  | 0.010817102 | 0.098841895 |
| Beta          | <i>TSTA3</i>      | 145.6192089 | -0.831263799 | 0.32621368  | -2.548218695 | 0.010827457 | 0.098860118 |
| Beta          | <i>FRY</i>        | 55.89995842 | 0.652315715  | 0.256042971 | 2.547680624  | 0.01084417  | 0.098936315 |
| Beta          | <i>AC004540.2</i> | 118.1521972 | 0.973094528  | 0.382058592 | 2.546977214  | 0.010866053 | 0.09905487  |
| Beta          | <i>FKBP4</i>      | 118.5635333 | -0.837218018 | 0.328743044 | -2.546724662 | 0.010873919 | 0.09905487  |
| Beta          | <i>TTC23</i>      | 15.81166241 | 1.120309275  | 0.440129092 | 2.545410644  | 0.01091493  | 0.099339164 |
| Beta          | <i>MAZ</i>        | 245.4381931 | 0.458538387  | 0.180159035 | 2.545186745  | 0.010921931 | 0.099339164 |
| Beta          | <i>ZNF207</i>     | 341.6773405 | 0.416264187  | 0.163628568 | 2.543957888  | 0.01096043  | 0.099583537 |
| Beta          | <i>POLR2J</i>     | 536.9676356 | -0.44972078  | 0.176791507 | -2.543791772 | 0.010965643 | 0.099583537 |
| Beta          | <i>SRSF3</i>      | 435.7291719 | 0.490777429  | 0.192955627 | 2.543473003  | 0.010975654 | 0.099597951 |
| Beta          | <i>NCAM1</i>      | 86.69791832 | 0.667876829  | 0.262675701 | 2.542590835  | 0.0110034   | 0.099757484 |
| Beta          | <i>ARHGAP12</i>   | 114.4155983 | 0.490534199  | 0.192943075 | 2.542377843  | 0.011010108 | 0.099757484 |
| Cycling Alpha | <i>HLA-A</i>      | 117.5976581 | 2.123523922  | 0.318611399 | 6.664933924  | 2.65E-11    | 5.28E-08    |
| Cycling Alpha | <i>B2M</i>        | 321.0907442 | 2.037082086  | 0.323655126 | 6.293989873  | 3.09E-10    | 3.08E-07    |
| Cycling Alpha | <i>SGO2</i>       | 7.599617505 | 2.793312426  | 0.512243152 | 5.453098625  | 4.95E-08    | 3.29E-05    |
| Cycling Alpha | <i>KPNA2</i>      | 14.46443264 | 2.357596458  | 0.442458041 | 5.328406858  | 9.91E-08    | 3.97E-05    |
| Cycling Alpha | <i>KIF5B</i>      | 22.3901915  | 1.437800728  | 0.269876421 | 5.327626333  | 9.95E-08    | 3.97E-05    |
| Cycling Alpha | <i>HNRNP1A1</i>   | 53.6190616  | 1.083635466  | 0.215496291 | 5.028557391  | 4.94E-07    | 0.000164151 |
| Cycling Alpha | <i>KIF20B</i>     | 9.285618251 | 2.145580661  | 0.429901893 | 4.990861167  | 6.01E-07    | 0.000171144 |
| Cycling Alpha | <i>CKAP2</i>      | 18.98434693 | 2.556602304  | 0.518193184 | 4.933685702  | 8.07E-07    | 0.000201025 |
| Cycling Alpha | <i>GAS2L3</i>     | 5.676807476 | 2.601873968  | 0.533277284 | 4.879026437  | 1.07E-06    | 0.000236084 |
| Cycling Alpha | <i>HLA-B</i>      | 74.71114514 | 2.260541514  | 0.481253574 | 4.697194232  | 2.64E-06    | 0.000525673 |
| Cycling Alpha | <i>CENPF</i>      | 40.53743468 | 2.550585817  | 0.555033307 | 4.59537434   | 4.32E-06    | 0.000774962 |

|               |           |             |              |             |              |             |             |
|---------------|-----------|-------------|--------------|-------------|--------------|-------------|-------------|
| Cycling Alpha | CENPE     | 3.765478503 | 2.233180719  | 0.487672179 | 4.579266186  | 4.67E-06    | 0.000774962 |
| Cycling Alpha | MDM4      | 5.999672659 | 1.653900436  | 0.371512894 | 4.451798203  | 8.52E-06    | 0.001305479 |
| Cycling Alpha | CKAP2L    | 6.938058076 | 1.901090208  | 0.430865663 | 4.412257397  | 1.02E-05    | 0.001396281 |
| Cycling Alpha | THOC2     | 4.701389446 | 1.737772111  | 0.394395633 | 4.40616469   | 1.05E-05    | 0.001396281 |
| Cycling Alpha | FOS       | 22.0747433  | 2.467069427  | 0.561664919 | 4.392422143  | 1.12E-05    | 0.001396281 |
| Cycling Alpha | DDX5      | 37.88293866 | 1.379314324  | 0.316936148 | 4.352025896  | 1.35E-05    | 0.001581332 |
| Cycling Alpha | ECT2      | 10.46892588 | 2.096057083  | 0.484890176 | 4.322746029  | 1.54E-05    | 0.001640198 |
| Cycling Alpha | LARP7     | 5.967785166 | 1.531459227  | 0.354543516 | 4.319523997  | 1.56E-05    | 0.001640198 |
| Cycling Alpha | ASPM      | 11.2099007  | 2.850539664  | 0.663523376 | 4.296065171  | 1.74E-05    | 0.001693104 |
| Cycling Alpha | UBE2C     | 23.85691755 | 1.783749357  | 0.415759501 | 4.290339375  | 1.78E-05    | 0.001693104 |
| Cycling Alpha | GGH       | 9.472280661 | 1.820208657  | 0.429407942 | 4.238879813  | 2.25E-05    | 0.002035015 |
| Cycling Alpha | RAD21     | 20.99468633 | 1.60795999   | 0.380401222 | 4.22701058   | 2.37E-05    | 0.002052067 |
| Cycling Alpha | SUGP2     | 8.592938302 | 2.177274702  | 0.519904153 | 4.187838642  | 2.82E-05    | 0.002338649 |
| Cycling Alpha | ARHGAP11A | 9.378002843 | 1.84284212   | 0.444674484 | 4.14424975   | 3.41E-05    | 0.002717878 |
| Cycling Alpha | PPP1CC    | 17.14829429 | 1.235980545  | 0.301217978 | 4.103276144  | 4.07E-05    | 0.003051294 |
| Cycling Alpha | CALM2     | 119.0175275 | 1.318784658  | 0.321664519 | 4.099876044  | 4.13E-05    | 0.003051294 |
| Cycling Alpha | CDKN2D    | 15.54648978 | 1.740032263  | 0.425967426 | 4.084895126  | 4.41E-05    | 0.003138742 |
| Cycling Alpha | HNRNPM    | 25.9636773  | 1.190668587  | 0.292624711 | 4.068926995  | 4.72E-05    | 0.00319269  |
| Cycling Alpha | TNRC6A    | 6.825911009 | 1.528228682  | 0.37595973  | 4.064873338  | 4.81E-05    | 0.00319269  |
| Cycling Alpha | TACC3     | 12.30754758 | 1.736236698  | 0.430094234 | 4.03687509   | 5.42E-05    | 0.003482471 |
| Cycling Alpha | ANKHD1    | 6.903338201 | 1.428455058  | 0.357247086 | 3.99850723   | 6.37E-05    | 0.003970008 |
| Cycling Alpha | ANLN      | 8.214184753 | 1.877983116  | 0.471058168 | 3.986732945  | 6.70E-05    | 0.004045751 |
| Cycling Alpha | PDCD4     | 8.547056942 | 1.338536079  | 0.336442902 | 3.978494039  | 6.94E-05    | 0.004065318 |
| Cycling Alpha | DEPDC1    | 8.227461163 | 2.100677029  | 0.530787208 | 3.957663252  | 7.57E-05    | 0.004267645 |
| Cycling Alpha | SFPQ      | 34.75584068 | 1.387614124  | 0.351003323 | 3.953279165  | 7.71E-05    | 0.004267645 |
| Cycling Alpha | RPS18     | 261.1964426 | -0.530969222 | 0.13468622  | -3.942268342 | 8.07E-05    | 0.004347681 |
| Cycling Alpha | SENP6     | 6.115518926 | 1.406822591  | 0.35869977  | 3.922005833  | 8.78E-05    | 0.004537942 |
| Cycling Alpha | PRC1      | 19.88568443 | 1.886320968  | 0.481288323 | 3.919315882  | 8.88E-05    | 0.004537942 |
| Cycling Alpha | RACGAP1   | 8.600299482 | 1.751150502  | 0.451061151 | 3.88229068   | 0.000103477 | 0.005155745 |
| Cycling Alpha | PHF3      | 7.456807712 | 1.227693999  | 0.319477098 | 3.842823188  | 0.000121627 | 0.005825063 |
| Cycling Alpha | HMMR      | 9.115297764 | 2.400410784  | 0.62530577  | 3.838779201  | 0.000123648 | 0.005825063 |
| Cycling Alpha | TOP2A     | 35.35037329 | 2.246596217  | 0.585848082 | 3.83477609   | 0.000125679 | 0.005825063 |
| Cycling Alpha | XRCC6     | 20.78912279 | 0.870300714  | 0.23072261  | 3.772065146  | 0.000161902 | 0.007333423 |
| Cycling Alpha | CSNK1D    | 5.943461919 | 1.198757818  | 0.319497161 | 3.752013988  | 0.00017542  | 0.007769142 |
| Cycling Alpha | PAX6      | 9.167865517 | 2.996748223  | 0.802254617 | 3.735407886  | 0.000187411 | 0.007940404 |
| Cycling Alpha | PTTG1     | 36.63749133 | 1.598487603  | 0.42929908  | 3.723482479  | 0.000196494 | 0.007940404 |
| Cycling Alpha | NDC80     | 8.97945644  | 1.52871587   | 0.410623132 | 3.722917073  | 0.000196934 | 0.007940404 |
| Cycling Alpha | PRPF4B    | 5.88740828  | 1.387074895  | 0.372752333 | 3.721170259  | 0.000198302 | 0.007940404 |
| Cycling Alpha | UBE2S     | 54.92632096 | 1.904349541  | 0.512055013 | 3.719033097  | 0.000199987 | 0.007940404 |
| Cycling Alpha | CHD9      | 7.996512907 | 1.438883476  | 0.388034488 | 3.708132959  | 0.000208793 | 0.007940404 |
| Cycling Alpha | ALCAM     | 6.436635168 | 1.667684597  | 0.450062285 | 3.705452894  | 0.000211013 | 0.007940404 |
| Cycling Alpha | MYEF2     | 7.824899149 | 1.981614432  | 0.534808704 | 3.705277081  | 0.00021116  | 0.007940404 |
| Cycling Alpha | NUF2      | 7.345082195 | 1.900807594  | 0.516467216 | 3.680403199  | 0.000232865 | 0.00859446  |
| Cycling Alpha | HMGN3     | 19.34696053 | 1.1163944    | 0.304083112 | 3.671346276  | 0.000241276 | 0.008742971 |
| Cycling Alpha | STMN1     | 73.66910498 | 1.937329526  | 0.533896011 | 3.628664548  | 0.000284891 | 0.010139072 |
| Cycling Alpha | HLA-C     | 59.45962564 | 1.420628245  | 0.392132862 | 3.622823746  | 0.000291404 | 0.010188929 |
| Cycling Alpha | ANKRD12   | 15.20119242 | 1.205067191  | 0.335609104 | 3.590686835  | 0.000329808 | 0.011332875 |
| Cycling Alpha | RPS14     | 193.7450392 | -0.606849196 | 0.17020921  | -3.565313513 | 0.000363421 | 0.012276255 |
| Cycling Alpha | GFPT1     | 7.022019166 | 1.342878898  | 0.377417579 | 3.558071943  | 0.000373587 | 0.012299356 |
| Cycling Alpha | REEP5     | 12.04367554 | -1.021655851 | 0.287299372 | -3.556067127 | 0.000376448 | 0.012299356 |
| Cycling Alpha | RPL13     | 266.0181852 | -0.625088872 | 0.176094637 | -3.549732589 | 0.000385623 | 0.012395902 |
| Cycling Alpha | NME2      | 47.39546545 | -1.046753604 | 0.295571932 | -3.5414513   | 0.000397932 | 0.012588557 |
| Cycling Alpha | H2AFV     | 24.56121548 | 1.061608734  | 0.300948246 | 3.527545837  | 0.000419431 | 0.012864252 |
| Cycling Alpha | PPP2R5C   | 6.243019    | 1.270144115  | 0.360186092 | 3.526355249  | 0.000421321 | 0.012864252 |
| Cycling Alpha | ITCH      | 3.426044106 | 1.68480953   | 0.478174116 | 3.523422693  | 0.000426011 | 0.012864252 |
| Cycling Alpha | GPBP1     | 7.906936598 | 1.096870333  | 0.31189772  | 3.516762904  | 0.000436844 | 0.012994473 |
| Cycling Alpha | SORT1     | 5.981911283 | 1.426956646  | 0.407445475 | 3.50220271   | 0.000461428 | 0.013523924 |
| Cycling Alpha | HMGCB2    | 45.0619029  | 1.496874699  | 0.428977748 | 3.489399406  | 0.000484107 | 0.013931746 |
| Cycling Alpha | MAD2L1    | 14.36421364 | 1.247037413  | 0.357672555 | 3.486533689  | 0.000489324 | 0.013931746 |
| Cycling Alpha | CDC20     | 6.124884681 | 1.738364426  | 0.499883118 | 3.477541774  | 0.000506034 | 0.014204594 |
| Cycling Alpha | SUMF2     | 6.877784845 | 1.687008618  | 0.486167203 | 3.47001733   | 0.000520425 | 0.014405647 |
| Cycling Alpha | HNRNPL    | 5.636994184 | 1.247459206  | 0.360617343 | 3.45923243   | 0.000541717 | 0.014494594 |
| Cycling Alpha | QPCT      | 11.14545701 | 2.229912087  | 0.644911644 | 3.4577017    | 0.000544804 | 0.014494594 |
| Cycling Alpha | SMC2      | 6.780870149 | 1.774577424  | 0.513272403 | 3.457379384  | 0.000545456 | 0.014494594 |
| Cycling Alpha | MUC13     | 7.121291145 | 1.724627625  | 0.500170995 | 3.448076044  | 0.000564595 | 0.014805762 |
| Cycling Alpha | HP1BP3    | 19.60225649 | 1.217594505  | 0.354808918 | 3.431690816  | 0.000599831 | 0.015525495 |
| Cycling Alpha | STAG2     | 7.376561426 | 1.373034454  | 0.400823789 | 3.425531344  | 0.000613598 | 0.015678219 |
| Cycling Alpha | TNFRSF12A | 16.72094261 | -2.669957036 | 0.783439887 | -3.407992217 | 0.000654428 | 0.0165098   |
| Cycling Alpha | LUC7L3    | 7.71316673  | 1.474693653  | 0.433726047 | 3.400057858  | 0.000673716 | 0.016674425 |
| Cycling Alpha | TMEM176A  | 11.1934614  | 2.242194487  | 0.660230935 | 3.39607608   | 0.000683594 | 0.016674425 |
| Cycling Alpha | WNK1      | 7.531767848 | 1.373342878  | 0.404508162 | 3.395093122  | 0.000686053 | 0.016674425 |
| Cycling Alpha | BRCA2     | 8.238155204 | 1.792327205  | 0.529422592 | 3.385437702  | 0.000710648 | 0.017064123 |
| Cycling Alpha | ASH1L     | 9.04895635  | 1.583823459  | 0.47013181  | 3.368892351  | 0.000754709 | 0.017713766 |

|               |                  |             |              |             |              |             |             |
|---------------|------------------|-------------|--------------|-------------|--------------|-------------|-------------|
| Cycling Alpha | <i>HMG2N</i>     | 116.6680198 | 1.321972214  | 0.392438352 | 3.368611165  | 0.000755479 | 0.017713766 |
| Cycling Alpha | <i>ZNF91</i>     | 7.148614891 | 2.055060003  | 0.612796825 | 3.353574821  | 0.000797748 | 0.018487356 |
| Cycling Alpha | <i>CDC48</i>     | 9.278898822 | 1.758793435  | 0.525307272 | 3.348123146  | 0.000813608 | 0.018638181 |
| Cycling Alpha | <i>MGST3</i>     | 15.3183602  | -0.982496196 | 0.294313821 | -3.33826047  | 0.000843047 | 0.019093094 |
| Cycling Alpha | <i>RPS23</i>     | 193.2817974 | -0.503137754 | 0.151551174 | -3.319919865 | 0.000900433 | 0.020163627 |
| Cycling Alpha | <i>MKI67</i>     | 20.40469162 | 1.624887964  | 0.490796674 | 3.310715112  | 0.000930579 | 0.020607154 |
| Cycling Alpha | <i>BDP1</i>      | 5.815591432 | 1.300014005  | 0.393606367 | 3.302827677  | 0.000957152 | 0.020888206 |
| Cycling Alpha | <i>CDK1</i>      | 12.93962763 | 1.413139991  | 0.428132463 | 3.300707407  | 0.000964414 | 0.020888206 |
| Cycling Alpha | <i>RB1CC1</i>    | 8.887327971 | 1.387141097  | 0.420966278 | 3.295135902  | 0.000983741 | 0.020888206 |
| Cycling Alpha | <i>SRSF10</i>    | 15.58876781 | 0.997062278  | 0.302624177 | 3.294721156  | 0.000985194 | 0.020888206 |
| Cycling Alpha | <i>FIS1</i>      | 11.00063039 | -1.12093889  | 0.341141177 | -3.28585045  | 0.00101675  | 0.02133034  |
| Cycling Alpha | <i>DNTTIP2</i>   | 7.924356919 | 1.051482875  | 0.321910866 | 3.266378942  | 0.001089324 | 0.022614814 |
| Cycling Alpha | <i>BCAM</i>      | 7.436001801 | 1.483703675  | 0.459175012 | 3.231237841  | 0.001232553 | 0.025324523 |
| Cycling Alpha | <i>CCNB2</i>     | 7.266946293 | 1.755758448  | 0.546391943 | 3.213368113  | 0.00131188  | 0.026679362 |
| Cycling Alpha | <i>SRP9</i>      | 18.52108909 | 0.829206336  | 0.258463473 | 3.208214785  | 0.001335617 | 0.026887726 |
| Cycling Alpha | <i>EMC10</i>     | 24.45682236 | 1.162982232  | 0.363174539 | 3.202268075  | 0.0013635   | 0.027174564 |
| Cycling Alpha | <i>SLC36A4</i>   | 6.870704868 | 1.281742297  | 0.40164378  | 3.191241493  | 0.001416628 | 0.02771951  |
| Cycling Alpha | <i>SMARCA2</i>   | 6.52948607  | 1.13167755   | 0.354665869 | 3.190827337  | 0.00141866  | 0.02771951  |
| Cycling Alpha | <i>BIRC5</i>     | 28.16466245 | 1.23320029   | 0.387767643 | 3.180255786  | 0.001471451 | 0.028471864 |
| Cycling Alpha | <i>TROAP</i>     | 6.847084726 | 1.660884867  | 0.522928085 | 3.176124812  | 0.001492567 | 0.028602754 |
| Cycling Alpha | <i>SGO1</i>      | 5.843863293 | 1.254055564  | 0.398550028 | 3.146544914  | 0.001652119 | 0.031358789 |
| Cycling Alpha | <i>RPS24</i>     | 168.4145357 | -0.446142408 | 0.142195819 | -3.137521284 | 0.001703829 | 0.031890559 |
| Cycling Alpha | <i>ZFR</i>       | 7.110353088 | 1.412627327  | 0.450441499 | 3.136094988  | 0.001712137 | 0.031890559 |
| Cycling Alpha | <i>CDC88A</i>    | 5.352525226 | 1.776592181  | 0.567842265 | 3.128671972  | 0.001755982 | 0.032103346 |
| Cycling Alpha | <i>SYNE1</i>     | 7.107248449 | 1.798502689  | 0.575145178 | 3.127041239  | 0.001765752 | 0.032103346 |
| Cycling Alpha | <i>SON</i>       | 21.1621818  | 0.921832276  | 0.295000073 | 3.1248544    | 0.001778931 | 0.032103346 |
| Cycling Alpha | <i>PPM1A</i>     | 4.304516543 | 1.044311508  | 0.334355234 | 3.123359234  | 0.001787994 | 0.032103346 |
| Cycling Alpha | <i>ACAP2</i>     | 4.686190089 | 1.324589428  | 0.424769814 | 3.118369961  | 0.001818544 | 0.032350546 |
| Cycling Alpha | <i>JUNB</i>      | 17.14313142 | 1.516907514  | 0.487131651 | 3.113958024  | 0.001845957 | 0.032350546 |
| Cycling Alpha | <i>DBF4</i>      | 5.917901431 | 1.585057923  | 0.509625158 | 3.110242694  | 0.001869337 | 0.032350546 |
| Cycling Alpha | <i>FBXL5</i>     | 7.908615036 | 1.405192963  | 0.452014128 | 3.108736819  | 0.00187889  | 0.032350546 |
| Cycling Alpha | <i>HNRNPF</i>    | 15.8082273  | 0.995495763  | 0.320290428 | 3.108103384  | 0.001882922 | 0.032350546 |
| Cycling Alpha | <i>CYTH2</i>     | 4.948373447 | 1.061693131  | 0.342538007 | 3.099490013  | 0.001938541 | 0.033021474 |
| Cycling Alpha | <i>RPL12</i>     | 174.0359987 | -0.607603575 | 0.196552333 | -3.091306855 | 0.001992776 | 0.033657646 |
| Cycling Alpha | <i>CDKN3</i>     | 11.52672287 | 1.136032631  | 0.37000297  | 3.070333818  | 0.002138196 | 0.035810298 |
| Cycling Alpha | <i>PBK</i>       | 12.81949254 | 1.925930323  | 0.629189748 | 3.060969015  | 0.002206219 | 0.036475095 |
| Cycling Alpha | <i>DDX3X</i>     | 9.24494771  | 1.268013428  | 0.414404067 | 3.059847934  | 0.002214494 | 0.036475095 |
| Cycling Alpha | <i>HMGXB4</i>    | 7.138507481 | 1.109866625  | 0.36301262  | 3.057377524  | 0.002232829 | 0.036475635 |
| Cycling Alpha | <i>RBBP7</i>     | 8.42069385  | 0.97491748   | 0.320230755 | 3.044421762  | 0.002331281 | 0.037774327 |
| Cycling Alpha | <i>EEF1AKMT2</i> | 3.158566337 | 1.238382694  | 0.407648875 | 3.037866089  | 0.002382598 | 0.038294499 |
| Cycling Alpha | <i>RPL19</i>     | 180.7794423 | -0.407303859 | 0.135391482 | -3.008341835 | 0.002626775 | 0.041881299 |
| Cycling Alpha | <i>RPS12</i>     | 271.4153105 | -0.832902418 | 0.277252968 | -3.004124444 | 0.002663464 | 0.04212923  |
| Cycling Alpha | <i>ZC3H6</i>     | 6.573650612 | 1.492062252  | 0.499024211 | 2.989959643  | 0.002790143 | 0.043565085 |
| Cycling Alpha | <i>NTSC3A</i>    | 5.375185553 | 1.199537626  | 0.401431099 | 2.988153207  | 0.002806688 | 0.043565085 |
| Cycling Alpha | <i>EEF1B2</i>    | 62.25724705 | -0.801840333 | 0.268467935 | -2.986726642 | 0.002819817 | 0.043565085 |
| Cycling Alpha | <i>IL6ST</i>     | 7.566616365 | 1.261142801  | 0.423464508 | 2.978154671  | 0.002899896 | 0.044457637 |
| Cycling Alpha | <i>HLA-E</i>     | 15.86630452 | 1.256174647  | 0.425072695 | 2.955199574  | 0.003124669 | 0.046977645 |
| Cycling Alpha | <i>FTH1</i>      | 264.6011506 | -1.037275036 | 0.351024647 | -2.954992031 | 0.003126771 | 0.046977645 |
| Cycling Alpha | <i>PBRM1</i>     | 6.022246792 | 1.103355678  | 0.373489346 | 2.954182467  | 0.003134986 | 0.046977645 |
| Cycling Alpha | <i>CDK27</i>     | 4.137197367 | 1.134079129  | 0.385165259 | 2.94439621   | 0.003235855 | 0.047809215 |
| Cycling Alpha | <i>DDX17</i>     | 6.753587474 | 1.167419114  | 0.396536147 | 2.944042106  | 0.003239559 | 0.047809215 |
| Cycling Alpha | <i>SMC3</i>      | 19.71178541 | 0.960611957  | 0.326531877 | 2.94186272   | 0.003262445 | 0.047809215 |
| Cycling Alpha | <i>RANGAP1</i>   | 7.938338711 | 1.303701536  | 0.443505249 | 2.93954026   | 0.003286996 | 0.047817389 |
| Cycling Alpha | <i>ECHDC2</i>    | 4.668681624 | 1.373454179  | 0.467913971 | 2.935270723  | 0.003332568 | 0.048129042 |
| Cycling Alpha | <i>OAZ2</i>      | 7.892803795 | 0.957685859  | 0.327289165 | 2.926115376  | 0.003432236 | 0.049004033 |
| Cycling Alpha | <i>DNMT1</i>     | 6.401538744 | 1.668554598  | 0.570406686 | 2.925201684  | 0.00344233  | 0.049004033 |
| Cycling Alpha | <i>UBE2K</i>     | 8.710833889 | 1.128926636  | 0.386559781 | 2.920445147  | 0.003495317 | 0.049405441 |
| Cycling Alpha | <i>HNRNPD</i>    | 15.68121759 | 0.939198352  | 0.32323589  | 2.905612838  | 0.003665347 | 0.051331845 |
| Cycling Alpha | <i>P4HB</i>      | 26.84204924 | -1.300791382 | 0.447915661 | -2.90409891  | 0.003683118 | 0.051331845 |
| Cycling Alpha | <i>LCOR</i>      | 6.680817003 | 1.218539699  | 0.419959534 | 2.901564554  | 0.003713043 | 0.051389542 |
| Cycling Alpha | <i>PAIP2</i>     | 9.68342815  | 0.819615641  | 0.283267386 | 2.893434545  | 0.003810537 | 0.052375175 |
| Cycling Alpha | <i>CEP350</i>    | 5.143715302 | 1.2105153    | 0.418824905 | 2.890265801  | 0.003849162 | 0.052521496 |
| Cycling Alpha | <i>RPS19</i>     | 187.2221029 | -0.562774931 | 0.195021578 | -2.885705969 | 0.003905368 | 0.052521496 |
| Cycling Alpha | <i>RASSF1</i>    | 6.566319749 | 1.065817917  | 0.369400818 | 2.885261392  | 0.003910888 | 0.052521496 |
| Cycling Alpha | <i>CCNB1</i>     | 9.104426744 | 1.573055821  | 0.545442485 | 2.883999438  | 0.003926595 | 0.052521496 |
| Cycling Alpha | <i>DYRK1A</i>    | 4.63655732  | 1.277478569  | 0.44568861  | 2.866302929  | 0.004152966 | 0.055051964 |
| Cycling Alpha | <i>MZT1</i>      | 7.434485575 | 1.092993045  | 0.381707965 | 2.8634274    | 0.004190848 | 0.055051964 |
| Cycling Alpha | <i>USP8</i>      | 4.994783312 | 0.945115081  | 0.330290099 | 2.861469612  | 0.004216819 | 0.055051964 |
| Cycling Alpha | <i>PSMD14</i>    | 11.04504104 | 1.106537054  | 0.386798269 | 2.860760102  | 0.004226267 | 0.055051964 |
| Cycling Alpha | <i>HMG1</i>      | 33.60031385 | 0.727629053  | 0.254639484 | 2.857487154  | 0.004270099 | 0.055091077 |
| Cycling Alpha | <i>KANSL1</i>    | 3.758575207 | 1.081600777  | 0.378656806 | 2.856414458  | 0.004284554 | 0.055091077 |
| Cycling Alpha | <i>ATP5MC1</i>   | 15.90865821 | -0.839912872 | 0.294660539 | -2.850442329 | 0.004365847 | 0.05577649  |
| Cycling Alpha | <i>CLTC</i>      | 11.44801175 | 0.943894387  | 0.331942031 | 2.843551884  | 0.004461375 | 0.055849919 |

|               |                  |             |              |             |              |             |             |
|---------------|------------------|-------------|--------------|-------------|--------------|-------------|-------------|
| Cycling Alpha | <i>TCEAL8</i>    | 8.808378125 | 1.007022953  | 0.354144272 | 2.843538731  | 0.004461559 | 0.055849919 |
| Cycling Alpha | <i>UBE2D3</i>    | 31.01999433 | 0.63326201   | 0.222735096 | 2.84311732   | 0.004467462 | 0.055849919 |
| Cycling Alpha | <i>RWDD1</i>     | 15.09668621 | 0.780022287  | 0.274466141 | 2.841961798  | 0.004483686 | 0.055849919 |
| Cycling Alpha | <i>FNIP1</i>     | 5.615348248 | 1.187252694  | 0.420208102 | 2.825392198  | 0.004722278 | 0.058456516 |
| Cycling Alpha | <i>BUD23</i>     | 11.25024163 | 0.952844555  | 0.33854104  | 2.81456143   | 0.004884384 | 0.058677907 |
| Cycling Alpha | <i>MORF4L2</i>   | 16.7111142  | 0.887319881  | 0.31536703  | 2.813610168  | 0.00489886  | 0.058677907 |
| Cycling Alpha | <i>DCTN3</i>     | 18.83848752 | 0.823183797  | 0.292772475 | 2.81168439   | 0.004928283 | 0.058677907 |
| Cycling Alpha | <i>NDUFA4</i>    | 20.88919659 | -1.268719012 | 0.451449122 | -2.810325571 | 0.004949141 | 0.058677907 |
| Cycling Alpha | <i>HNRNPA0</i>   | 17.57298116 | 0.873642062  | 0.311139791 | 2.807876355  | 0.004986937 | 0.058677907 |
| Cycling Alpha | <i>CDCA5</i>     | 5.583558107 | 1.430175107  | 0.509835625 | 2.805169036  | 0.00502902  | 0.058677907 |
| Cycling Alpha | <i>TPX2</i>      | 16.61502078 | 1.37430452   | 0.490103948 | 2.804108239  | 0.005045596 | 0.058677907 |
| Cycling Alpha | <i>TAF15</i>     | 6.800124461 | 1.193917395  | 0.425855896 | 2.803571363  | 0.005054005 | 0.058677907 |
| Cycling Alpha | <i>FABP5</i>     | 12.08051447 | 1.584720937  | 0.565334743 | 2.803155044  | 0.005060534 | 0.058677907 |
| Cycling Alpha | <i>GTSE1</i>     | 4.931702077 | 1.427608262  | 0.509435897 | 2.802331499  | 0.005073471 | 0.058677907 |
| Cycling Alpha | <i>CHGB</i>      | 160.6956661 | 3.157785677  | 1.126922384 | 2.802132358  | 0.005076604 | 0.058677907 |
| Cycling Alpha | <i>ARID1A</i>    | 8.269498422 | 1.164621124  | 0.41584673  | 2.80060186   | 0.005100741 | 0.058677907 |
| Cycling Alpha | <i>SS18</i>      | 4.08409377  | 1.052125166  | 0.375866112 | 2.799201985  | 0.005122908 | 0.058677907 |
| Cycling Alpha | <i>RHEB</i>      | 31.63890333 | 0.866654674  | 0.30994076  | 2.796194583  | 0.005170826 | 0.05888319  |
| Cycling Alpha | <i>RBM39</i>     | 24.56812318 | 0.971188505  | 0.347929152 | 2.791339849  | 0.005249033 | 0.059273555 |
| Cycling Alpha | <i>OSTC</i>      | 9.32638826  | -1.174714164 | 0.420982645 | -2.790409956 | 0.005264134 | 0.059273555 |
| Cycling Alpha | <i>ARL6IP1</i>   | 78.85479825 | 1.36003719   | 0.487814798 | 2.788019542  | 0.005303134 | 0.05937723  |
| Cycling Alpha | <i>HSPA5</i>     | 44.29126792 | -1.582723505 | 0.56868782  | -2.78311483  | 0.005383975 | 0.059945596 |
| Cycling Alpha | <i>PRELID3B</i>  | 5.233157362 | 1.026529894  | 0.370456138 | 2.770989027  | 0.005588631 | 0.061878565 |
| Cycling Alpha | <i>DDX39A</i>    | 11.23786289 | 1.043984935  | 0.377085087 | 2.768565955  | 0.005630359 | 0.061996161 |
| Cycling Alpha | <i>PRDX6</i>     | 10.50246512 | -0.949776829 | 0.343315435 | -2.766484496 | 0.005666428 | 0.062050499 |
| Cycling Alpha | <i>ELF1</i>      | 4.516016593 | 1.213102294  | 0.439454167 | 2.760475118  | 0.005771735 | 0.062858299 |
| Cycling Alpha | <i>SAFB</i>      | 4.276128117 | 0.986239722  | 0.358352113 | 2.752152661  | 0.005920491 | 0.064127932 |
| Cycling Alpha | <i>S100A6</i>    | 76.06177256 | -1.809199928 | 0.658468873 | -2.747586109 | 0.006003574 | 0.064676343 |
| Cycling Alpha | <i>NUSAP1</i>    | 21.11746099 | 1.457867942  | 0.53141596  | 2.743364994  | 0.006081305 | 0.065161509 |
| Cycling Alpha | <i>PRRC2C</i>    | 17.13635361 | 0.761671218  | 0.278277019 | 2.737097085  | 0.0061984   | 0.065830325 |
| Cycling Alpha | <i>CSNK1A1</i>   | 12.56677263 | 0.697014529  | 0.254710842 | 2.736493363  | 0.006209785 | 0.065830325 |
| Cycling Alpha | <i>RNF213</i>    | 4.085853411 | 1.653730442  | 0.606136347 | 2.728314266  | 0.006365893 | 0.066896329 |
| Cycling Alpha | <i>NPTN</i>      | 5.856038513 | 1.045294957  | 0.383433756 | 2.726142234  | 0.006407938 | 0.066896329 |
| Cycling Alpha | <i>SEPTIN7</i>   | 18.39443037 | 0.772756931  | 0.283623183 | 2.724590152  | 0.006438135 | 0.066896329 |
| Cycling Alpha | <i>CCNL1</i>     | 10.36724868 | 1.643064806  | 0.603123671 | 2.724258532  | 0.006444604 | 0.066896329 |
| Cycling Alpha | <i>FTL</i>       | 327.8505155 | -1.386906301 | 0.509946374 | -2.719710094 | 0.006533917 | 0.067156012 |
| Cycling Alpha | <i>MRPL41</i>    | 15.83300861 | -0.723537708 | 0.266147643 | -2.718557638 | 0.006556723 | 0.067156012 |
| Cycling Alpha | <i>SMC4</i>      | 13.12290632 | 1.448718131  | 0.53303777  | 2.717852681  | 0.006570709 | 0.067156012 |
| Cycling Alpha | <i>PTMS</i>      | 27.73912387 | 1.003909965  | 0.370226941 | 2.711607001  | 0.006695793 | 0.067906484 |
| Cycling Alpha | <i>FCGRT</i>     | 4.466363089 | 0.955416046  | 0.352449106 | 2.710791515  | 0.006712282 | 0.067906484 |
| Cycling Alpha | <i>SEC22C</i>    | 6.530436866 | 0.94360755   | 0.348776108 | 2.705482195  | 0.00682053  | 0.068653117 |
| Cycling Alpha | <i>TBC1D15</i>   | 9.771254323 | 1.179012483  | 0.436671907 | 2.699996184  | 0.006934027 | 0.069444805 |
| Cycling Alpha | <i>RCAN2</i>     | 5.565856279 | 1.600399352  | 0.593166329 | 2.698061698  | 0.006974451 | 0.069500407 |
| Cycling Alpha | <i>RPL14</i>     | 135.4868442 | -0.284236363 | 0.105631537 | -2.690828612 | 0.00712748  | 0.070671979 |
| Cycling Alpha | <i>CNOT1</i>     | 8.705181492 | 1.230349412  | 0.457830278 | 2.687348281  | 0.007202181 | 0.071059145 |
| Cycling Alpha | <i>HNRNPUL2</i>  | 6.49207594  | 1.205057856  | 0.449202697 | 2.682659442  | 0.007303933 | 0.071103244 |
| Cycling Alpha | <i>GABARAPL2</i> | 12.62859688 | 1.038467163  | 0.387107771 | 2.682630632  | 0.007304562 | 0.071103244 |
| Cycling Alpha | <i>VMA21</i>     | 6.971855653 | 0.984667865  | 0.367110197 | 2.682213335  | 0.00731368  | 0.071103244 |
| Cycling Alpha | <i>COX8A</i>     | 67.57259574 | 0.642335219  | 0.240061471 | 2.675711416  | 0.007457082 | 0.072145463 |
| Cycling Alpha | <i>HNRNPC</i>    | 19.12789922 | 0.822413908  | 0.307833263 | 2.671621319  | 0.007548578 | 0.072468052 |
| Cycling Alpha | <i>ATG12</i>     | 6.394979117 | 1.067140188  | 0.399532213 | 2.670974091  | 0.007563148 | 0.072468052 |
| Cycling Alpha | <i>SBNO1</i>     | 5.942882041 | 0.896576586  | 0.336502121 | 2.664400992  | 0.007712557 | 0.07352726  |
| Cycling Alpha | <i>CCNA2</i>     | 7.387669648 | 1.19348152   | 0.4482672   | 2.662433302  | 0.007757794 | 0.07352726  |
| Cycling Alpha | <i>FOXM1</i>     | 10.89071697 | 1.011185762  | 0.379961888 | 2.661282078  | 0.007784371 | 0.07352726  |
| Cycling Alpha | <i>SNHG29</i>    | 53.03630908 | -0.557454473 | 0.209665016 | -2.658786304 | 0.007842269 | 0.073724724 |
| Cycling Alpha | <i>PRPF40A</i>   | 11.80651899 | 0.74530981   | 0.280850465 | 2.653760284  | 0.007960035 | 0.074480518 |
| Cycling Alpha | <i>CNOT2</i>     | 4.807986961 | 1.074863856  | 0.405394985 | 2.651398993  | 0.008015909 | 0.07465283  |
| Cycling Alpha | <i>RFC1</i>      | 6.502871845 | 1.022907818  | 0.387100456 | 2.642486732  | 0.008229969 | 0.076289898 |
| Cycling Alpha | <i>ANP32E</i>    | 11.73834841 | 0.984981181  | 0.373348417 | 2.638235857  | 0.00833386  | 0.076689176 |
| Cycling Alpha | <i>PPIG</i>      | 19.00455295 | 0.817662572  | 0.31000488  | 2.637579683  | 0.008350001 | 0.076689176 |
| Cycling Alpha | <i>NIPBL</i>     | 7.182215106 | 1.066817981  | 0.407080955 | 2.620653137  | 0.00877615  | 0.080021574 |
| Cycling Alpha | <i>FLOT1</i>     | 6.863460325 | 0.928519812  | 0.354397723 | 2.619999373  | 0.008793138 | 0.080021574 |
| Cycling Alpha | <i>PABPC1</i>    | 30.82154622 | 0.762923718  | 0.291607855 | 2.616266004  | 0.008889727 | 0.080078223 |
| Cycling Alpha | <i>TARS</i>      | 7.259605    | 1.251840662  | 0.478768222 | 2.614711264  | 0.008930291 | 0.080078223 |
| Cycling Alpha | <i>PAFAH1B1</i>  | 9.895434785 | 0.841666041  | 0.321898881 | 2.614690797  | 0.008930826 | 0.080078223 |
| Cycling Alpha | <i>ATF6</i>      | 4.021447161 | 1.11529199   | 0.427141398 | 2.611060399  | 0.009026195 | 0.080078223 |
| Cycling Alpha | <i>ASXL1</i>     | 4.36481439  | 1.008023382  | 0.386182085 | 2.610228235  | 0.009048183 | 0.080078223 |
| Cycling Alpha | <i>TMCO3</i>     | 8.490802833 | 1.151251272  | 0.441187259 | 2.609439072  | 0.009069079 | 0.080078223 |
| Cycling Alpha | <i>GAPDH</i>     | 194.7837017 | 0.735682554  | 0.282040851 | 2.608425519  | 0.00909598  | 0.080078223 |
| Cycling Alpha | <i>TAF1D</i>     | 7.308145381 | 0.880173844  | 0.337555629 | 2.607492714  | 0.009120801 | 0.080078223 |
| Cycling Alpha | <i>RPL26</i>     | 181.3882691 | -0.41570147  | 0.159588701 | -2.604830219 | 0.00919198  | 0.080200505 |
| Cycling Alpha | <i>FMC1</i>      | 4.818944    | 1.180218807  | 0.453239085 | 2.603965208  | 0.009215211 | 0.080200505 |
| Cycling Alpha | <i>S100A11</i>   | 28.12720412 | -2.395871887 | 0.922450166 | -2.597291405 | 0.009396217 | 0.081394598 |

|               |                  |             |              |             |              |             |             |
|---------------|------------------|-------------|--------------|-------------|--------------|-------------|-------------|
| Cycling Alpha | <i>SNHG8</i>     | 22.90793647 | 0.98993558   | 0.38152361  | 2.594690224  | 0.009467621 | 0.081394598 |
| Cycling Alpha | <i>SUZ12</i>     | 11.26978498 | 1.120339496  | 0.431893796 | 2.594016183  | 0.009486202 | 0.081394598 |
| Cycling Alpha | <i>FXR1</i>      | 9.613455153 | 0.971736216  | 0.37476148  | 2.592945826  | 0.009515776 | 0.081394598 |
| Cycling Alpha | <i>ATP5MPL</i>   | 34.13867439 | 0.5963356    | 0.230656375 | 2.585385293  | 0.009727023 | 0.082845972 |
| Cycling Alpha | <i>C2orf69</i>   | 5.756545347 | 1.196299909  | 0.463172586 | 2.582838332  | 0.009799123 | 0.083104902 |
| Cycling Alpha | <i>PNISR</i>     | 20.21646602 | 0.99546447   | 0.387678854 | 2.567755397  | 0.010235936 | 0.086084015 |
| Cycling Alpha | <i>CNIH1</i>     | 6.046415865 | 0.941433927  | 0.367067793 | 2.5647413    | 0.010325276 | 0.086084015 |
| Cycling Alpha | <i>LINC01578</i> | 9.861484238 | 1.306190135  | 0.50931353  | 2.564609141  | 0.010329209 | 0.086084015 |
| Cycling Alpha | <i>REEP3</i>     | 5.197355369 | 1.118395484  | 0.436164637 | 2.564159013  | 0.010342615 | 0.086084015 |
| Cycling Alpha | <i>DLGAP5</i>    | 4.393515221 | 1.374937203  | 0.536380243 | 2.563362875  | 0.010366364 | 0.086084015 |
| Cycling Alpha | <i>GLS</i>       | 9.575908392 | 1.585169354  | 0.618750083 | 2.561889521  | 0.010410443 | 0.086091339 |
| Cycling Alpha | <i>USP47</i>     | 4.036532041 | 0.832948459  | 0.325752219 | 2.557000106  | 0.010557919 | 0.086950131 |
| Cycling Alpha | <i>DAP</i>       | 9.996504142 | 0.743288295  | 0.291032308 | 2.553971754  | 0.01065019  | 0.087349086 |
| Cycling Alpha | <i>C12orf65</i>  | 4.859745815 | 1.053028505  | 0.41266935  | 2.551748766  | 0.010718378 | 0.08754806  |
| Cycling Alpha | <i>TMX2</i>      | 3.352640716 | 1.303553258  | 0.513197022 | 2.540063956  | 0.01108322  | 0.090112946 |
| Cycling Alpha | <i>RBM23</i>     | 5.298501298 | 1.025698023  | 0.404006403 | 2.538816257  | 0.011122822 | 0.090112946 |
| Cycling Alpha | <i>TSNAX</i>     | 8.289872344 | 0.906353601  | 0.358237873 | 2.530032891  | 0.011405183 | 0.09202644  |
| Cycling Alpha | <i>SREK1</i>     | 7.259040033 | 0.940516833  | 0.372233142 | 2.526687519  | 0.01151439  | 0.092320452 |
| Cycling Alpha | <i>TWF1</i>      | 6.345047888 | 0.881575892  | 0.349289812 | 2.523909546  | 0.011605779 | 0.092320452 |
| Cycling Alpha | <i>LDLR</i>      | 10.20245932 | 1.078870468  | 0.42754923  | 2.523383023  | 0.011623172 | 0.092320452 |
| Cycling Alpha | <i>NCOR1</i>     | 4.609243045 | 0.883014188  | 0.350132434 | 2.521943417  | 0.011670848 | 0.092320452 |
| Cycling Alpha | <i>CKS2</i>      | 23.36837058 | 1.155037091  | 0.458007904 | 2.521871527  | 0.011673233 | 0.092320452 |
| Cycling Alpha | <i>APLP1</i>     | 8.604070398 | 1.489057043  | 0.592312184 | 2.513973347  | 0.011937946 | 0.094040812 |
| Cycling Alpha | <i>CHID1</i>     | 8.394998725 | 1.055262435  | 0.420290432 | 2.510793384  | 0.012046018 | 0.094518558 |
| Cycling Alpha | <i>TBL1XR1</i>   | 4.632975815 | 1.238207731  | 0.493991162 | 2.506538226  | 0.012191987 | 0.094896519 |
| Cycling Alpha | <i>REK1</i>      | 8.406359151 | -1.04968786  | 0.418814842 | -2.506329181 | 0.012199199 | 0.094896519 |
| Cycling Alpha | <i>TMEM176B</i>  | 15.52610168 | 1.645967996  | 0.657011617 | 2.505234234  | 0.012237032 | 0.094896519 |
| Cycling Alpha | <i>RP54X</i>     | 175.5454869 | -0.490897826 | 0.196562511 | -2.497413286 | 0.012510306 | 0.096639688 |
| Cycling Alpha | <i>PIM3</i>      | 7.282499567 | 1.374370216  | 0.552375263 | 2.488109638  | 0.012842414 | 0.098822124 |
| Cycling Alpha | <i>ARHGEF12</i>  | 7.52728313  | 1.071060675  | 0.431301394 | 2.483323008  | 0.0130163   | 0.099774946 |
| Delta         | <i>ZFP36</i>     | 11.62981942 | 2.326040715  | 0.46932345  | 4.956157025  | 7.19E-07    | 0.002418754 |
| Delta         | <i>HLA-B</i>     | 66.21374671 | 1.985373207  | 0.430248746 | 4.614477619  | 3.94E-06    | 0.006628514 |
| Delta         | <i>AQP3</i>      | 34.75104077 | 2.895737356  | 0.648230808 | 4.467139359  | 7.93E-06    | 0.008700035 |
| Delta         | <i>HLA-A</i>     | 214.6387313 | 1.074896868  | 0.243749823 | 4.409836509  | 1.03E-05    | 0.008700035 |
| Delta         | <i>DGCR6L</i>    | 11.80124839 | -1.195724035 | 0.291386086 | -4.103572864 | 4.07E-05    | 0.027370732 |
| Delta         | <i>HLA-C</i>     | 97.76446531 | 1.022340256  | 0.252542208 | 4.0481956    | 5.16E-05    | 0.027772796 |
| Delta         | <i>SCG2</i>      | 84.01326157 | 1.506765856  | 0.375209889 | 4.015794623  | 5.92E-05    | 0.027772796 |
| Delta         | <i>B2M</i>       | 530.0201194 | 0.879364889  | 0.220387003 | 3.99009413   | 6.60E-05    | 0.027772796 |
| Delta         | <i>PRG4</i>      | 20.8112476  | 2.769837415  | 0.713203418 | 3.883656953  | 0.000102897 | 0.037273756 |
| Delta         | <i>IARS</i>      | 12.11458498 | 1.09131015   | 0.282310924 | 3.865632025  | 0.000110802 | 0.037273756 |
| Delta         | <i>CTSL</i>      | 32.48426328 | 0.867000651  | 0.231856616 | 3.73938284   | 0.000184473 | 0.056415075 |
| Delta         | <i>MEITRN</i>    | 36.88277063 | -1.433855417 | 0.395453795 | -3.625848166 | 0.000288015 | 0.08074008  |
| Delta         | <i>HLA-E</i>     | 24.29771871 | 1.213042219  | 0.341291403 | 3.554271246  | 0.000379028 | 0.098080805 |
| Ductal        | <i>S100A2</i>    | 31.97295768 | -2.010770735 | 0.414417605 | -4.852039853 | 1.22E-06    | 0.013127737 |
| Ductal        | <i>PDLM2</i>     | 41.15183069 | -1.467095514 | 0.323990412 | -4.58206573  | 5.95E-06    | 0.025009226 |
| Ductal        | <i>TEN1</i>      | 50.54418227 | -0.879957274 | 0.195799312 | -4.494179607 | 6.98E-06    | 0.025009226 |
| Ductal        | <i>MSANTD4</i>   | 24.41804404 | 0.895146591  | 0.204846459 | 4.369841671  | 1.24E-05    | 0.033393717 |
| Gamma+Epsilon | <i>B2M</i>       | 482.8800623 | 1.076163501  | 0.214354957 | 5.020474051  | 5.15E-07    | 0.001546839 |
| Gamma+Epsilon | <i>FAM229B</i>   | 10.0101047  | -1.370683494 | 0.319209758 | -4.293989953 | 1.75E-05    | 0.026332337 |
| Gamma+Epsilon | <i>TFH3</i>      | 17.07281199 | -1.572695366 | 0.388936641 | -4.043577287 | 5.26E-05    | 0.042138954 |
| Gamma+Epsilon | <i>HLA-A</i>     | 219.6391642 | 0.93379551   | 0.236221777 | 3.953045821  | 7.72E-05    | 0.042138954 |
| Gamma+Epsilon | <i>LDHA</i>      | 11.12147284 | 1.542643888  | 0.390303857 | 3.952417739  | 7.74E-05    | 0.042138954 |
| Gamma+Epsilon | <i>TMBIM6</i>    | 77.91444853 | 0.578468599  | 0.148329916 | 3.899878156  | 9.62E-05    | 0.042138954 |
| Gamma+Epsilon | <i>GOLGA4</i>    | 28.85376834 | 0.930472988  | 0.238903119 | 3.894771205  | 9.83E-05    | 0.042138954 |
| Gamma+Epsilon | <i>RGS4</i>      | 15.01237241 | 1.747840589  | 0.467870231 | 3.735737972  | 0.000187165 | 0.058794587 |
| Gamma+Epsilon | <i>SYPL1</i>     | 8.59051525  | 0.949731525  | 0.254783167 | 3.727607031  | 0.000193306 | 0.058794587 |
| Gamma+Epsilon | <i>WSB1</i>      | 15.07647204 | 0.77102511   | 0.207029717 | 3.72422434   | 0.000195917 | 0.058794587 |
| Gamma+Epsilon | <i>HLA-B</i>     | 81.51667186 | 1.564026927  | 0.423954313 | 3.689140267  | 0.000225013 | 0.059154275 |
| Gamma+Epsilon | <i>HLA-C</i>     | 91.27557117 | 1.055027378  | 0.287086753 | 3.674942744  | 0.000237903 | 0.059154275 |
| Gamma+Epsilon | <i>SCAND1</i>    | 51.23401796 | -0.759624438 | 0.20777863  | -3.655931505 | 0.00025625  | 0.059154275 |
| Gamma+Epsilon | <i>SELENOW</i>   | 25.42637488 | -0.778012927 | 0.218930357 | -3.55370054  | 0.000379851 | 0.081423876 |
| Gamma+Epsilon | <i>ISOC2</i>     | 8.958260745 | -1.023615796 | 0.293883352 | -3.483068337 | 0.000495702 | 0.09917341  |
| Macrophage    | <i>RO60</i>      | 7.822473626 | 0.973946751  | 0.235443455 | 4.136648234  | 3.52E-05    | 0.043546056 |
| Macrophage    | <i>CCT4</i>      | 6.873421616 | 1.096345678  | 0.268716825 | 4.079929413  | 4.50E-05    | 0.043546056 |
| Macrophage    | <i>BLOC1S6</i>   | 8.091749288 | 0.96320528   | 0.237367031 | 4.057873061  | 4.95E-05    | 0.043546056 |
| Macrophage    | <i>EIF2S3</i>    | 6.337598152 | 1.36564649   | 0.343986736 | 3.970055664  | 7.19E-05    | 0.047388928 |
| Macrophage    | <i>EIF2A</i>     | 4.649416122 | 1.151220019  | 0.300638936 | 3.829244591  | 0.000128537 | 0.067816231 |
| Macrophage    | <i>GAPVD1</i>    | 4.753258099 | 1.120082677  | 0.299402029 | 3.741065756  | 0.000183242 | 0.080565209 |
| Macrophage    | <i>TMCO1</i>     | 8.870477413 | 1.170250576  | 0.317157089 | 3.689813713  | 0.000224418 | 0.08457365  |
| Macrophage    | <i>MED13</i>     | 9.377927432 | 0.864602344  | 0.238589823 | 3.623802283  | 0.000290304 | 0.088970008 |
| Macrophage    | <i>ARRDC3</i>    | 11.55190703 | 1.295293227  | 0.35858223  | 3.612262732  | 0.000303537 | 0.088970008 |
| Macrophage    | <i>EIF2AK2</i>   | 9.491761101 | 0.952266187  | 0.268445252 | 3.547338534  | 0.000389144 | 0.09915745  |
| Macrophage    | <i>PIA2</i>      | 13.32358722 | 0.874483229  | 0.247635377 | 3.531334011  | 0.000413469 | 0.09915745  |

|                  |                |             |              |             |              |             |             |
|------------------|----------------|-------------|--------------|-------------|--------------|-------------|-------------|
| Mast             | <i>MALAT1</i>  | 3931.46393  | -2.419451919 | 0.483037497 | -5.008828367 | 5.48E-07    | 0.000138312 |
| Mast             | <i>SAT1</i>    | 28.71209335 | -2.635777369 | 0.537886991 | -4.900243756 | 9.57E-07    | 0.000138312 |
| Mast             | <i>NEAT1</i>   | 447.8094171 | -3.414777933 | 0.711147083 | -4.80178857  | 1.57E-06    | 0.000151489 |
| Mast             | <i>FTH1</i>    | 216.1492322 | -1.785534794 | 0.450877552 | -3.960132385 | 7.49E-05    | 0.005170404 |
| Mast             | <i>SERP1</i>   | 6.302847396 | -2.065324062 | 0.527197835 | -3.917550352 | 8.95E-05    | 0.005170404 |
| Mast             | <i>RBM25</i>   | 14.40078836 | -2.160271442 | 0.575103538 | -3.756317427 | 0.000172432 | 0.008305473 |
| Mast             | <i>SF3B1</i>   | 8.36412762  | -2.17043964  | 0.584142953 | -3.715596722 | 0.000202725 | 0.008369634 |
| Mast             | <i>CD44</i>    | 18.03059698 | -2.077421996 | 0.567889056 | -3.658147617 | 0.000254045 | 0.0091372   |
| Mast             | <i>SRSF10</i>  | 8.833940081 | -1.79525604  | 0.497356444 | -3.609596423 | 0.000306674 | 0.0091372   |
| Mast             | <i>SQSTM1</i>  | 12.41083385 | -1.883099316 | 0.522838998 | -3.601681059 | 0.000316166 | 0.0091372   |
| Mast             | <i>FTL</i>     | 229.109473  | -1.877201865 | 0.542303611 | -3.461533037 | 0.000537108 | 0.014111297 |
| Mast             | <i>H3F3B</i>   | 49.87886351 | -1.053760471 | 0.309128457 | -3.408810958 | 0.000652467 | 0.015613016 |
| Mast             | <i>RPS29</i>   | 118.1641666 | 0.993594414  | 0.293210422 | 3.388673593  | 0.000702316 | 0.015613016 |
| Mast             | <i>RPS9</i>    | 53.2549804  | -0.595047267 | 0.181369744 | -3.280851884 | 0.001034941 | 0.021364135 |
| Mast             | <i>RPL36AL</i> | 24.88342889 | -0.759131374 | 0.251253643 | -3.021374594 | 0.002516298 | 0.048480684 |
| Mast             | <i>SFPQ</i>    | 11.71311184 | -1.414473932 | 0.473794071 | -2.985419232 | 0.002831899 | 0.051151178 |
| Mast             | <i>SNHG8</i>   | 10.54923047 | -1.061163962 | 0.358555286 | -2.95955464  | 0.003080841 | 0.052374291 |
| Mast             | <i>FUS</i>     | 14.11035674 | -1.445015847 | 0.497247037 | -2.906032092 | 0.003660439 | 0.058770383 |
| Mast             | <i>SRSF5</i>   | 13.77868673 | -1.006307841 | 0.362494881 | -2.776060828 | 0.005502191 | 0.083691226 |
| Mast             | <i>BTG2</i>    | 9.508556241 | -1.685903757 | 0.611485516 | -2.757062455 | 0.005832321 | 0.084277039 |
| Mast             | <i>HLA-A</i>   | 24.49011377 | 0.792733001  | 0.29066882  | 2.727272233  | 0.006386033 | 0.087883976 |
| Mast             | <i>SKP1</i>    | 11.47602034 | -0.90199174  | 0.337759668 | -2.670513464 | 0.007573533 | 0.099488689 |
| MUC5B+ Ductal    | <i>TBL1XR1</i> | 9.000430511 | 1.45047732   | 0.3134983   | 4.626747001  | 3.71E-06    | 0.01294888  |
| MUC5B+ Ductal    | <i>AHCYL1</i>  | 14.60345043 | 1.064456426  | 0.24598024  | 4.327406242  | 1.51E-05    | 0.020054835 |
| MUC5B+ Ductal    | <i>LPP</i>     | 15.78062945 | 1.375030303  | 0.319946524 | 4.297687894  | 1.73E-05    | 0.020054835 |
| MUC5B+ Ductal    | <i>NFE2L2</i>  | 26.07100112 | 1.046538378  | 0.250008095 | 4.186017971  | 2.84E-05    | 0.022490055 |
| MUC5B+ Ductal    | <i>CLDN12</i>  | 6.062885137 | 1.310003633  | 0.316045552 | 4.144983604  | 3.40E-05    | 0.022490055 |
| MUC5B+ Ductal    | <i>GBP2</i>    | 8.419415483 | 1.72910138   | 0.421476014 | 4.102490582  | 4.09E-05    | 0.022490055 |
| MUC5B+ Ductal    | <i>RBBP4</i>   | 9.015903413 | 1.5253767    | 0.373925916 | 4.079355384  | 4.52E-05    | 0.022490055 |
| MUC5B+ Ductal    | <i>PATJ</i>    | 6.141412427 | 1.122323163  | 0.279074126 | 4.021595197  | 5.78E-05    | 0.025188676 |
| MUC5B+ Ductal    | <i>UGP2</i>    | 7.414933989 | 1.330986304  | 0.350254824 | 3.800051315  | 0.000144666 | 0.052301454 |
| MUC5B+ Ductal    | <i>VPS35</i>   | 7.886488963 | 1.014533733  | 0.267615327 | 3.791015059  | 0.000150033 | 0.052301454 |
| MUC5B+ Ductal    | <i>ABCF1</i>   | 10.00458624 | 1.053197129  | 0.281850308 | 3.736725135  | 0.000186433 | 0.059082163 |
| MUC5B+ Ductal    | <i>COPB2</i>   | 8.023239398 | 1.208967923  | 0.327963652 | 3.686286313  | 0.00022755  | 0.061535013 |
| MUC5B+ Ductal    | <i>COPB1</i>   | 11.5014163  | 1.075408238  | 0.291902147 | 3.684139524  | 0.000229477 | 0.061535013 |
| MUC5B+ Ductal    | <i>WNK1</i>    | 8.980002477 | 1.291202425  | 0.353536215 | 3.652249391  | 0.000259953 | 0.064728357 |
| MUC5B+ Ductal    | <i>MED4</i>    | 8.213970959 | 0.863417824  | 0.238425266 | 3.621335273  | 0.000293086 | 0.068113279 |
| MUC5B+ Ductal    | <i>PRKDC</i>   | 5.650070064 | 1.477184705  | 0.412491962 | 3.581123616  | 0.00034212  | 0.069444713 |
| MUC5B+ Ductal    | <i>DYNC1I2</i> | 10.07324986 | 1.478021538  | 0.413063204 | 3.578197046  | 0.000345973 | 0.069444713 |
| MUC5B+ Ductal    | <i>XRCC5</i>   | 30.15678246 | 0.928405639  | 0.261123712 | 3.555424479  | 0.000377369 | 0.069444713 |
| MUC5B+ Ductal    | <i>NMT1</i>    | 9.426685779 | 1.295015332  | 0.364317062 | 3.554638165  | 0.0003785   | 0.069444713 |
| MUC5B+ Ductal    | <i>TRIB1</i>   | 7.535998497 | 1.432254267  | 0.409490161 | 3.497652453  | 0.000469372 | 0.075297919 |
| MUC5B+ Ductal    | <i>NARS</i>    | 6.68476827  | 1.426493667  | 0.407888475 | 3.497263974  | 0.000470056 | 0.075297919 |
| MUC5B+ Ductal    | <i>PRMT2</i>   | 5.632393697 | 1.36650737   | 0.391684378 | 3.488797222  | 0.000485199 | 0.075297919 |
| MUC5B+ Ductal    | <i>WBP2</i>    | 11.84996334 | 0.968749091  | 0.278500983 | 3.478440467  | 0.00050434  | 0.075297919 |
| MUC5B+ Ductal    | <i>HIPK2</i>   | 9.872134476 | 1.380628132  | 0.397753685 | 3.471063084  | 0.000518402 | 0.075297919 |
| MUC5B+ Ductal    | <i>NAMPT</i>   | 21.68461983 | 1.267130306  | 0.367490058 | 3.448066903  | 0.000564614 | 0.075980368 |
| MUC5B+ Ductal    | <i>HDAC1</i>   | 8.200720382 | 1.020509985  | 0.296051041 | 3.447074468  | 0.000566692 | 0.075980368 |
| MUC5B+ Ductal    | <i>HIF1A</i>   | 28.07328848 | 1.373404195  | 0.402902945 | 3.408771797  | 0.00065256  | 0.084252802 |
| MUC5B+ Ductal    | <i>WSB1</i>    | 11.95945474 | 0.966947408  | 0.284834634 | 3.394767676  | 0.000686869 | 0.08551514  |
| MUC5B+ Ductal    | <i>UACA</i>    | 6.277413724 | 1.370494797  | 0.406901502 | 3.368124201  | 0.000756815 | 0.090974375 |
| MUC5B+ Ductal    | <i>PA2G4</i>   | 21.51870495 | 0.884495472  | 0.263920764 | 3.351367502  | 0.000804135 | 0.091265724 |
| MUC5B+ Ductal    | <i>SHTN1</i>   | 7.010118181 | 1.088661493  | 0.325575218 | 3.343809457  | 0.000826365 | 0.091265724 |
| MUC5B+ Ductal    | <i>GPI</i>     | 8.674607996 | 1.072273196  | 0.321931964 | 3.330744746  | 0.00086614  | 0.091265724 |
| MUC5B+ Ductal    | <i>SON</i>     | 38.54058959 | 0.741056715  | 0.222703878 | 3.327542932  | 0.000876155 | 0.091265724 |
| MUC5B+ Ductal    | <i>SYNE2</i>   | 10.07584769 | 1.126271769  | 0.338919207 | 3.323127595  | 0.000890142 | 0.091265724 |
| Quiescent Stella | <i>HLA-B</i>   | 141.0683439 | 1.241179681  | 0.282310336 | 4.396508106  | 1.10E-05    | 0.036445072 |
| Quiescent Stella | <i>PSMD14</i>  | 13.64086598 | 1.204579648  | 0.298765713 | 4.031853706  | 5.53E-05    | 0.091668444 |



Supplemental Table 7: Significantly enriched pathways in T1D beta cells (GSEA)

| Pathway                                                    | Database | pval     | padj       | log2err    | ES         | NES        | size |
|------------------------------------------------------------|----------|----------|------------|------------|------------|------------|------|
| ANTIGEN_PROCESSING_CROSS_PRESENTATION                      | REACTOME | 3.62E-11 | 3.96E-07   | 0.85133906 | 0.9069189  | 1.81239964 | 79   |
| ADAPTIVE_IMMUNE_RESPONSE                                   | GOBP     | 1.09E-09 | 5.98E-06   | 0.78818681 | 0.8207473  | 1.67118731 | 159  |
| ADAPTIVE_IMMUNE_RESPONSE_BASED_ON_SOMATIC_RECOMBINATION    | GOBP     | 3.28E-09 | 1.20E-05   | 0.77493903 | 0.83708    | 1.69347315 | 119  |
| ANTIGEN_PROCESSING_AND_PRESENTATION                        | GOBP     | 1.27E-08 | 3.41E-05   | 0.74773966 | 0.92158847 | 1.81769518 | 55   |
| LEUKOCYTE_MEDIATED_CYTOTOXICITY                            | GOBP     | 1.56E-08 | 3.41E-05   | 0.73376199 | 0.93176878 | 1.82203133 | 44   |
| IMMUNOREGULATORY_INTERACTIONS_BETWEEN_A_LYMPHOID_AND_F     | REACTOME | 2.62E-08 | 4.78E-05   | 0.73376199 | 0.97388232 | 1.80375002 | 23   |
| POSITIVE_REGULATION_OF_IMMUNE_SYSTEM_PROCESS               | GOBP     | 3.52E-08 | 5.36E-05   | 0.71951283 | 0.69268456 | 1.43634434 | 446  |
| LYMPHOCYTE_MEDIATED_IMMUNITY                               | GOBP     | 3.91E-08 | 5.36E-05   | 0.71951283 | 0.83690511 | 1.69666868 | 110  |
| POSITIVE_REGULATION_OF_IMMUNE_EFFECTOR_PROCESS             | GOBP     | 7.02E-08 | 8.54E-05   | 0.70497572 | 0.83190945 | 1.68654091 | 110  |
| CELL_KILLING                                               | GOBP     | 9.62E-08 | 0.00010539 | 0.70497572 | 0.90971125 | 1.78855407 | 53   |
| INTERFERON_ALPHA_BETA_SIGNALING                            | REACTOME | 1.53E-07 | 0.00014931 | 0.69013246 | 0.93431743 | 1.81451733 | 40   |
| ANTIGEN_PRESENTATION_FOLDING_ASSEMBLY_AND_PEPTIDE_LOADING  | REACTOME | 1.64E-07 | 0.00014931 | 0.69013246 | 0.95128027 | 1.7995066  | 28   |
| LEUKOCYTE_MEDIATED_IMMUNITY                                | GOBP     | 1.81E-07 | 0.00014931 | 0.69013246 | 0.79340815 | 1.61423069 | 153  |
| IMMUNE_EFFECTOR_PROCESS                                    | GOBP     | 1.91E-07 | 0.00014931 | 0.69013246 | 0.74258116 | 1.52249334 | 240  |
| ANTIGEN_PROCESSING_AND_PRESENTATION_OF_PEPTIDE_ANTIGEN     | GOBP     | 2.18E-07 | 0.00015279 | 0.69013246 | 0.93335438 | 1.80307874 | 35   |
| REGULATION_OF_IMMUNE_EFFECTOR_PROCESS                      | GOBP     | 2.23E-07 | 0.00015279 | 0.69013246 | 0.7877323  | 1.60169261 | 149  |
| INNATE_IMMUNE_RESPONSE                                     | GOBP     | 2.69E-07 | 0.00017341 | 0.67496286 | 0.69402171 | 1.43775769 | 390  |
| POSITIVE_REGULATION_OF_IMMUNE_RESPONSE                     | GOBP     | 3.41E-07 | 0.00020762 | 0.67496286 | 0.72163285 | 1.48610121 | 297  |
| DEFENSE_RESPONSE_TO_OTHER_ORGANISM                         | GOBP     | 4.47E-07 | 0.00025783 | 0.67496286 | 0.6773241  | 1.40663499 | 479  |
| OXIDATIVE_PHOSPHORYLATION                                  | KEGG     | 5.44E-07 | 0.00029814 | 0.6594444  | -0.6107234 | -2.0520012 | 115  |
| REGULATION_OF_LEUKOCYTE_MEDIATED_CYTOTOXICITY              | GOBP     | 5.98E-07 | 0.00031224 | 0.6594444  | 0.95833161 | 1.79034281 | 25   |
| REGULATION_OF_CELL_KILLING                                 | GOBP     | 7.84E-07 | 0.00039068 | 0.6594444  | 0.95136753 | 1.80741202 | 29   |
| POSITIVE_REGULATION_OF_LEUKOCYTE_MEDIATED_IMMUNITY         | GOBP     | 8.68E-07 | 0.00041357 | 0.6594444  | 0.8618483  | 1.70655601 | 63   |
| T_CELL_MEDIATED_CYTOTOXICITY                               | GOBP     | 1.09E-06 | 0.00048055 | 0.64355184 | 0.97369105 | 1.74905443 | 18   |
| ANTIGEN_PROCESSING_AND_PRESENTATION                        | KEGG     | 1.10E-06 | 0.00048055 | 0.64355184 | 0.92451661 | 1.7923909  | 38   |
| COOPERATION_OF_PREFOLDIN_AND_TRIC_CCT_IN_ACTIN_AND_TUBULI  | REACTOME | 1.16E-06 | 0.0004892  | 0.64355184 | -0.8942896 | -2.2509337 | 24   |
| CYTOKINE_SIGNALING_IN_IMMUNE_SYSTEM                        | REACTOME | 1.29E-06 | 0.00050118 | 0.64355184 | 0.68141776 | 1.41157136 | 418  |
| REGULATION_OF_ADAPTIVE_IMMUNE_RESPONSE                     | GOBP     | 1.32E-06 | 0.00050118 | 0.64355184 | 0.82966582 | 1.66842895 | 88   |
| POSITIVE_REGULATION_OF_RESPONSE_TO_EXTERNAL_STIMULUS       | GOBP     | 1.33E-06 | 0.00050118 | 0.64355184 | 0.72554457 | 1.48963089 | 256  |
| REGULATION_OF_IMMUNE_RESPONSE                              | GOBP     | 1.45E-06 | 0.00051703 | 0.64355184 | 0.68822972 | 1.42471487 | 382  |
| POSITIVE_REGULATION_OF_CELL_KILLING                        | GOBP     | 1.46E-06 | 0.00051703 | 0.64355184 | 0.96765072 | 1.75146906 | 19   |
| ANTIGEN_BINDING                                            | GOMF     | 1.68E-06 | 0.00057368 | 0.64355184 | 0.96343543 | 1.75143633 | 20   |
| VIRAL_MYOCARDITIS                                          | KEGG     | 2.00E-06 | 0.00066361 | 0.62725674 | 0.93883675 | 1.78963974 | 30   |
| REGULATION_OF_PRODUCTION_OF_MOLECULAR_MEDIATOR_OF_IMML     | GOBP     | 3.45E-06 | 0.00111307 | 0.62725674 | 0.83419417 | 1.67316913 | 84   |
| CYTOKINE_PRODUCTION                                        | GOBP     | 3.56E-06 | 0.00111473 | 0.62725674 | 0.69133397 | 1.42689234 | 343  |
| ADAPTIVE_IMMUNE_SYSTEM                                     | REACTOME | 4.39E-06 | 0.00125893 | 0.61052688 | 0.65191789 | 1.35433105 | 500  |
| T_CELL_MEDIATED_IMMUNITY                                   | GOBP     | 4.44E-06 | 0.00125893 | 0.61052688 | 0.9019567  | 1.75840928 | 43   |
| PEPTIDE_BINDING                                            | GOMF     | 4.47E-06 | 0.00125893 | 0.61052688 | 0.76751147 | 1.5609884  | 157  |
| ANTIGEN_PROCESSING_AND_PRESENTATION_OF_PEPTIDE_ANTIGEN_VI  | GOBP     | 4.48E-06 | 0.00125893 | 0.61052688 | 0.94758877 | 1.75505114 | 23   |
| UNSATURATED_FATTY_ACID_METABOLIC_PROCESS                   | GOBP     | 4.87E-06 | 0.00133302 | 0.61052688 | 0.8955848  | 1.75150392 | 45   |
| NATURAL_KILLER_CELL_MEDIATED_IMMUNITY                      | GOBP     | 5.52E-06 | 0.00147532 | 0.61052688 | 0.92759246 | 1.75469713 | 28   |
| REGULATION_OF_LYMPHOCYTE_MEDIATED_IMMUNITY                 | GOBP     | 6.16E-06 | 0.00160719 | 0.61052688 | 0.84046437 | 1.67554318 | 72   |
| NEGATIVE_REGULATION_OF_IMMUNE_SYSTEM_PROCESS               | GOBP     | 6.88E-06 | 0.00172079 | 0.61052688 | 0.73154947 | 1.49712294 | 204  |
| POSITIVE_REGULATION_OF_LYMPHOCYTE_MEDIATED_IMMUNITY        | GOBP     | 7.03E-06 | 0.00172079 | 0.61052688 | 0.87753562 | 1.72793623 | 54   |
| REGULATION_OF_LEUKOCYTE_MEDIATED_IMMUNITY                  | GOBP     | 7.07E-06 | 0.00172079 | 0.61052688 | 0.81391664 | 1.64467783 | 98   |
| CELL_CELL_ADHESION                                         | GOBP     | 7.29E-06 | 0.00173323 | 0.61052688 | 0.67530002 | 1.39881985 | 395  |
| REGULATION_OF_DEFENSE_RESPONSE                             | GOBP     | 7.43E-06 | 0.00173323 | 0.61052688 | 0.67612522 | 1.39587502 | 344  |
| POSITIVE_REGULATION_OF_PRODUCTION_OF_MOLECULAR_MEDIATOR    | GOBP     | 8.74E-06 | 0.00199473 | 0.59332548 | 0.85694248 | 1.70486952 | 67   |
| POSITIVE_REGULATION_OF_T_CELL_MEDIATED_IMMUNITY            | GOBP     | 9.46E-06 | 0.00211477 | 0.59332548 | 0.92221214 | 1.74451935 | 28   |
| ICOSANOID_METABOLIC_PROCESS                                | GOBP     | 9.92E-06 | 0.00212097 | 0.59332548 | 0.88909232 | 1.72740049 | 41   |
| REGULATION_OF_T_CELL_MEDIATED_IMMUNITY                     | GOBP     | 1.01E-05 | 0.00212097 | 0.59332548 | 0.9061707  | 1.74580902 | 34   |
| UNSATURATED_FATTY_ACID_BIOSYNTHETIC_PROCESS                | GOBP     | 1.01E-05 | 0.00212097 | 0.59332548 | 0.94047352 | 1.74187281 | 23   |
| REGULATION_OF_T_CELL_MEDIATED_CYTOTOXICITY                 | GOBP     | 1.05E-05 | 0.00214554 | 0.59332548 | 0.98090106 | 1.70387532 | 13   |
| REGULATION_OF_RESPONSE_TO_EXTERNAL_STIMULUS                | GOBP     | 1.06E-05 | 0.00214554 | 0.59332548 | 0.65855456 | 1.36743989 | 478  |
| MOLECULAR_TRANSDUCER_ACTIVITY                              | GOMF     | 1.08E-05 | 0.00214554 | 0.59332548 | 0.70965001 | 1.46054647 | 270  |
| CELL_ACTIVATION_INVOLVED_IN_IMMUNE_RESPONSE                | GOBP     | 1.13E-05 | 0.00220643 | 0.59332548 | 0.77112047 | 1.56453289 | 129  |
| ANTIGEN_PROCESSING_AND_PRESENTATION_OF_ENDOGENOUS_ANTIC    | GOBP     | 1.16E-05 | 0.00222065 | 0.59332548 | 0.97535909 | 1.70731157 | 14   |
| REGULATION_OF_EXOCYTOSIS                                   | GOBP     | 1.26E-05 | 0.00237569 | 0.59332548 | 0.77589279 | 1.56938905 | 120  |
| NEGATIVE_REGULATION_OF_CELL_ACTIVATION                     | GOBP     | 1.35E-05 | 0.00247763 | 0.59332548 | 0.82324968 | 1.6451939  | 79   |
| METALLOTHIONEINS_BIND_METALS                               | REACTOME | 1.36E-05 | 0.00247763 | 0.59332548 | -0.9988848 | -1.7448602 | 4    |
| NEGATIVE_REGULATION_OF_T_CELL_CYTOKINE_PRODUCTION          | GOBP     | 1.64E-05 | 0.002943   | 0.57561026 | 0.99979461 | 1.37417267 | 2    |
| POSITIVE_REGULATION_OF_T_CELL_MEDIATED_CYTOTOXICITY        | GOBP     | 1.71E-05 | 0.00299081 | 0.57561026 | 0.98090194 | 1.70206331 | 12   |
| POSITIVE_REGULATION_OF_ANTIGEN_PROCESSING_AND_PRESENTATION | GOBP     | 1.75E-05 | 0.00299081 | 0.57561026 | 0.99978007 | 1.37415269 | 2    |
| POSITIVE_REGULATION_OF_DENDRITIC_CELL_ANTIGEN_PROCESSING_A | GOBP     | 1.75E-05 | 0.00299081 | 0.57561026 | 0.99978007 | 1.37415269 | 2    |
| NEGATIVE_REGULATION_OF_LYMPHOCYTE_ACTIVATION               | GOBP     | 1.79E-05 | 0.00301057 | 0.57561026 | 0.85629505 | 1.69464333 | 61   |
| POSITIVE_REGULATION_OF_ADAPTIVE_IMMUNE_RESPONSE            | GOBP     | 1.81E-05 | 0.00301057 | 0.57561026 | 0.85754056 | 1.69762036 | 60   |
| POSITIVE_REGULATION_OF_CYTOKINE_PRODUCTION_INVOLVED_IN_IMI | GOBP     | 1.91E-05 | 0.00308282 | 0.57561026 | 0.90277914 | 1.75246688 | 39   |
| SARS_COV_2_INFECTION                                       | REACTOME | 1.91E-05 | 0.00308282 | 0.57561026 | 0.72414366 | 1.48222373 | 202  |
| LYMPHOCYTE_ACTIVATION_INVOLVED_IN_IMMUNE_RESPONSE          | GOBP     | 2.01E-05 | 0.00315144 | 0.57561026 | 0.8058805  | 1.62686037 | 91   |
| REGULATION_OF_REGULATED_SECRETORY_PATHWAY                  | GOBP     | 2.01E-05 | 0.00315144 | 0.57561026 | 0.82875708 | 1.65087884 | 69   |
| PROSTANOID_METABOLIC_PROCESS                               | GOBP     | 2.16E-05 | 0.00333898 | 0.57561026 | 0.94042482 | 1.721167   | 21   |
| NEGATIVE_REGULATION_OF_CELL_KILLING                        | GOBP     | 2.40E-05 | 0.00362626 | 0.57561026 | 0.98957742 | 1.65166033 | 9    |
| AMIDE_BINDING                                              | GOMF     | 2.42E-05 | 0.00362626 | 0.57561026 | 0.72345229 | 1.48036058 | 207  |
| ANTIGEN_PROCESSING_AND_PRESENTATION_OF_EXOGENOUS_ANTIGE    | GOBP     | 2.48E-05 | 0.00366836 | 0.57561026 | 0.92196353 | 1.71699435 | 24   |
| REGULATION_OF_CELL_ACTIVATION                              | GOBP     | 2.53E-05 | 0.00369277 | 0.57561026 | 0.69067081 | 1.42258226 | 279  |
| POSITIVE_REGULATION_OF_VIRAL_PROCESS                       | GOBP     | 2.57E-05 | 0.00370812 | 0.57561026 | 0.85879022 | 1.68435681 | 46   |
| POSITIVE_REGULATION_OF_CELL_ACTIVATION                     | GOBP     | 2.64E-05 | 0.00376335 | 0.57561026 | 0.73571395 | 1.49955071 | 168  |
| CYTOKINE_PRODUCTION_INVOLVED_IN_IMMUNE_RESPONSE            | GOBP     | 2.74E-05 | 0.00381961 | 0.57561026 | 0.87513313 | 1.71988826 | 50   |
| PEPTIDE_ANTIGEN_BINDING                                    | GOMF     | 2.75E-05 | 0.00381961 | 0.57561026 | 0.97614785 | 1.69561874 | 13   |

|                                                                         |          |            |            |            |            |            |     |
|-------------------------------------------------------------------------|----------|------------|------------|------------|------------|------------|-----|
| SARS_COV_INFECTIONS                                                     | REACTOME | 2.83E-05   | 0.00388276 | 0.57561026 | 0.6909666  | 1.42359983 | 290 |
| RESPONSE_TO_COPPER_ION                                                  | GOBP     | 3.11E-05   | 0.00420298 | 0.55733224 | -0.8727418 | -2.2123358 | 22  |
| PRODUCTION_OF_MOLECULAR_MEDIATOR_OF_IMMUNE_RESPONSE                     | GOBP     | 3.25E-05   | 0.00433913 | 0.55733224 | 0.78697209 | 1.5937765  | 108 |
| NEGATIVE_REGULATION_OF_NATURAL_KILLER_CELL_MEDIATED_IMMUNITY            | GOBP     | 3.64E-05   | 0.00481055 | 0.55733224 | 0.9895779  | 1.62913715 | 8   |
| NEGATIVE_REGULATION_OF_LYMPHOCYTE_DIFFERENTIATION                       | GOBP     | 3.70E-05   | 0.00481215 | 0.55733224 | 0.92748861 | 1.71782316 | 23  |
| MONONUCLEAR_CELL_DIFFERENTIATION                                        | GOBP     | 3.73E-05   | 0.00481215 | 0.55733224 | 0.70970608 | 1.45238137 | 218 |
| LEUKOCYTE_CELL_CELL_ADHESION                                            | GOBP     | 3.85E-05   | 0.00490905 | 0.55733224 | 0.73073631 | 1.48940516 | 168 |
| MHC_PROTEIN_BINDING                                                     | GOMF     | 4.00E-05   | 0.00503776 | 0.55733224 | 0.96663207 | 1.70971201 | 15  |
| REGULATION_OF_NATURAL_KILLER_CELL_MEDIATED_IMMUNITY                     | GOBP     | 4.58E-05   | 0.00565946 | 0.55733224 | 0.96511493 | 1.7070286  | 15  |
| ANTIGEN_PROCESSING_AND_PRESENTATION_OF_ENDOGENOUS_PEPTIDES              | GOBP     | 4.60E-05   | 0.00565946 | 0.55733224 | 0.97566579 | 1.69297752 | 12  |
| ANTIGEN_PROCESSING_AND_PRESENTATION_OF_PEPTIDE_ANTIGEN_VIA_MHC_CLASS_II | GOBP     | 4.79E-05   | 0.00583385 | 0.55733224 | 0.9930496  | 1.61549438 | 7   |
| ENDOSOMAL_VACUOLAR_PATHWAY                                              | REACTOME | 5.29E-05   | 0.00637484 | 0.55733224 | 0.97855554 | 1.66828841 | 10  |
| ANTIGEN_PROCESSING_AND_PRESENTATION_VIA_MHC_CLASS_II                    | GOBP     | 5.36E-05   | 0.00639072 | 0.55733224 | 0.98642697 | 1.64640206 | 9   |
| SARS_COV_2_ACTIVATES_MODULATES_INNATE_AND_ADAPTIVE_IMMUNITY             | REACTOME | 5.45E-05   | 0.00642727 | 0.55733224 | 0.79382171 | 1.60251684 | 91  |
| NEGATIVE_REGULATION_OF_LYMPHOCYTE_MEDIATED_IMMUNITY                     | GOBP     | 5.55E-05   | 0.00646958 | 0.55733224 | 0.93912704 | 1.69984057 | 19  |
| NEGATIVE_REGULATION_OF_DEFENSE_RESPONSE                                 | GOBP     | 6.44E-05   | 0.00743415 | 0.5384341  | 0.75597559 | 1.52910277 | 120 |
| HSF1_ACTIVATION                                                         | REACTOME | 6.63E-05   | 0.00756623 | 0.5384341  | -0.8296747 | -2.1278069 | 23  |
| CLASS_II_MHC_MEDIATED_ANTIGEN_PROCESSING_PRESENTATION                   | REACTOME | 6.71E-05   | 0.0075832  | 0.5384341  | 0.67717798 | 1.39748741 | 317 |
| POSITIVE_REGULATION_OF_ERK1_AND_ERK2_CASCADE                            | GOBP     | 7.20E-05   | 0.0080532  | 0.5384341  | 0.81641286 | 1.62571963 | 70  |
| LYMPHOCYTE_ACTIVATION                                                   | GOBP     | 7.28E-05   | 0.00805435 | 0.5384341  | 0.66573621 | 1.3758128  | 362 |
| NEGATIVE_REGULATION_OF_LEUKOCYTE_MEDIATED_IMMUNITY                      | GOBP     | 7.43E-05   | 0.00807957 | 0.5384341  | 0.91717025 | 1.69871228 | 23  |
| FORMATION_OF_TUBULIN_FOLDING_INTERMEDIATES_BY_CCT_TRIC                  | REACTOME | 7.45E-05   | 0.00807957 | 0.5384341  | -0.9060644 | -2.2134061 | 17  |
| POSITIVE_REGULATION_OF_CELL_ADHESION                                    | GOBP     | 7.73E-05   | 0.00830226 | 0.5384341  | 0.70861397 | 1.45082331 | 214 |
| REGULATION_OF_FATTY_ACID_BIOSYNTHETIC_PROCESS                           | GOBP     | 7.82E-05   | 0.00832364 | 0.5384341  | 0.91151736 | 1.6975402  | 24  |
| MACROPHAGE_CYTOKINE_PRODUCTION                                          | GOBP     | 8.21E-05   | 0.00865499 | 0.5384341  | 0.96462397 | 1.68852035 | 14  |
| POSITIVE_REGULATION_OF_CELL_CELL_ADHESION                               | GOBP     | 8.35E-05   | 0.00871467 | 0.5384341  | 0.75022193 | 1.5213477  | 132 |
| CELL_ACTIVATION                                                         | GOBP     | 9.19E-05   | 0.00950509 | 0.5384341  | 0.6293992  | 1.30781533 | 493 |
| RESPONSE_TO_BACTERIUM                                                   | GOBP     | 9.42E-05   | 0.00961656 | 0.5384341  | 0.6940084  | 1.42283217 | 233 |
| RESPONSE_TO_ZINC_ION                                                    | GOBP     | 9.48E-05   | 0.00961656 | 0.5384341  | -0.821967  | -2.1046095 | 25  |
| RESPONSE_TO_CADMIUM_ION                                                 | GOBP     | 9.62E-05   | 0.00967685 | 0.5384341  | -0.7647885 | -2.1008897 | 34  |
| POSITIVE_REGULATION_OF_LYMPHOCYTE_ACTIVATION                            | GOBP     | 9.79E-05   | 0.0097506  | 0.5384341  | 0.73791461 | 1.50074779 | 152 |
| POSITIVE_REGULATION_OF_REGULATED_SECRETORY_PATHWAY                      | GOBP     | 0.00010832 | 0.01069441 | 0.5384341  | 0.90087722 | 1.69125767 | 26  |
| B_CELL_MEDIATED_IMMUNITY                                                | GOBP     | 0.00012208 | 0.01194547 | 0.51884808 | 0.83432685 | 1.64950259 | 58  |
| NATURAL_KILLER_CELL_MEDIATED_CYTOTOXICITY                               | KEGG     | 0.00012518 | 0.0121399  | 0.51884808 | 0.84479865 | 1.66347459 | 54  |
| CELLULAR_RESPONSE_TO_CADMIUM_ION                                        | GOBP     | 0.00013055 | 0.01235648 | 0.51884808 | -0.8653342 | -2.1750811 | 19  |
| POSITIVE_REGULATION_OF_FATTY_ACID_BIOSYNTHETIC_PROCESS                  | GOBP     | 0.0001306  | 0.01235648 | 0.51884808 | 0.98279383 | 1.64033814 | 9   |
| DEFENSE_RESPONSE_TO_GRAM_POSITIVE_BACTERIUM                             | GOBP     | 0.00013079 | 0.01235648 | 0.51884808 | 0.92063281 | 1.68494364 | 21  |
| AUTOIMMUNE_THYROID_DISEASE                                              | KEGG     | 0.00013345 | 0.01249979 | 0.51884808 | 0.98460018 | 1.62094235 | 8   |
| POSITIVE_REGULATION_OF_CYTOKINE_PRODUCTION                              | GOBP     | 0.00014397 | 0.01313637 | 0.51884808 | 0.71492117 | 1.46392073 | 200 |
| INTERFERON_GAMMA_SIGNALING                                              | REACTOME | 0.00014494 | 0.01313637 | 0.51884808 | 0.84620048 | 1.66274319 | 48  |
| REGULATION_OF_DNA_DAMAGE_RESPONSE_SIGNAL_TRANSDUCTION                   | GOBP     | 0.00014505 | 0.01313637 | 0.51884808 | 0.90179451 | 1.6794331  | 24  |
| REGULATION_OF_CELL_ADHESION                                             | GOBP     | 0.00014624 | 0.01313637 | 0.51884808 | 0.65602436 | 1.35651123 | 366 |
| POSITIVE_REGULATION_OF_CELL_POPULATION_PROLIFERATION                    | GOBP     | 0.00014624 | 0.01313637 | 0.51884808 | 0.63680365 | 1.31933444 | 421 |
| INTERFERON_SIGNALING                                                    | REACTOME | 0.0001497  | 0.01323061 | 0.51884808 | 0.75703471 | 1.53607718 | 128 |
| SARS_COV_2_HOST_INTERACTIONS                                            | REACTOME | 0.0001497  | 0.01323061 | 0.51884808 | 0.75270771 | 1.52644471 | 130 |
| PROTEASOME                                                              | KEGG     | 0.00015485 | 0.01357593 | 0.51884808 | 0.85793225 | 1.66686018 | 41  |
| GRANULOCYTE_MIGRATION                                                   | GOBP     | 0.00015689 | 0.01364537 | 0.51884808 | 0.83438483 | 1.63649017 | 46  |
| ERK1_AND_ERK2_CASCADE                                                   | GOBP     | 0.00015917 | 0.01373461 | 0.51884808 | 0.76047884 | 1.53821829 | 125 |
| TNFR2_NON_CANONICAL_NF_KB_PATHWAY                                       | REACTOME | 0.00017022 | 0.01457337 | 0.51884808 | 0.80624733 | 1.60547705 | 70  |
| ANTIOXIDANT_ACTIVITY                                                    | GOMF     | 0.00017716 | 0.01505044 | 0.51884808 | -0.6989795 | -1.9662439 | 44  |
| TYPE_1_DIABETES_MELLITUS                                                | KEGG     | 0.00018328 | 0.01545043 | 0.51884808 | 0.95827179 | 1.67740121 | 14  |
| BETA_2_MICROGLOBULIN_BINDING                                            | GOMF     | 0.00019153 | 0.01602262 | 0.51884808 | 0.99387991 | 1.53514395 | 5   |
| TAP_BINDING                                                             | GOMF     | 0.00019632 | 0.01615213 | 0.51884808 | 0.98901665 | 1.60893357 | 7   |
| PATHOGENIC_ESCHERICHIA_COLI_INFECTION                                   | KEGG     | 0.00019844 | 0.01615213 | 0.51884808 | -0.7304171 | -1.9344141 | 39  |
| ANTIGEN_PROCESSING_AND_PRESENTATION_OF_EXOGENOUS_PEPTIDES               | GOBP     | 0.00019937 | 0.01615213 | 0.51884808 | 0.93029026 | 1.69118149 | 20  |
| REGULATION_OF_LYMPHOCYTE_ACTIVATION                                     | GOBP     | 0.00020065 | 0.01615213 | 0.51884808 | 0.69159648 | 1.41782507 | 225 |
| RESPONSE_TO_TYPE_II_INTERFERON                                          | GOBP     | 0.00020135 | 0.01615213 | 0.51884808 | 0.82899615 | 1.63776348 | 59  |
| CYTOKINE_BINDING                                                        | GOMF     | 0.00020192 | 0.01615213 | 0.51884808 | 0.87204602 | 1.69280803 | 39  |
| HEMOPOIESIS                                                             | GOBP     | 0.00020745 | 0.01647462 | 0.51884808 | 0.62893486 | 1.30644092 | 475 |
| PROTON_MOTIVE_FORCE_DRIVEN_ATP_SYNTHESIS                                | GOBP     | 0.00021306 | 0.01679776 | 0.51884808 | -0.6042136 | -1.8188251 | 72  |
| HSP90_CHAPERONE_CYCLE_FOR_STEROID_HORMONE_RECEPTORS_SHR                 | REACTOME | 0.00022156 | 0.01734307 | 0.51884808 | -0.709142  | -1.9748371 | 43  |
| POSITIVE_REGULATION_OF_LEUKOCYTE_CHEMOTAXIS                             | GOBP     | 0.00022671 | 0.01762093 | 0.51884808 | 0.86831924 | 1.66819829 | 33  |
| GRANULOCYTE_CHEMOTAXIS                                                  | GOBP     | 0.00024096 | 0.01859631 | 0.51884808 | 0.8623337  | 1.67117921 | 36  |
| ICOSANOID_BIOSYNTHETIC_PROCESS                                          | GOBP     | 0.00024451 | 0.01873817 | 0.49849311 | 0.92827338 | 1.68751498 | 20  |
| POSITIVE_REGULATION_OF_MACROPHAGE_CYTOKINE_PRODUCTION                   | GOBP     | 0.00024903 | 0.01893892 | 0.49849311 | 0.97828061 | 1.63280533 | 9   |
| PROSTANOID_BIOSYNTHETIC_PROCESS                                         | GOBP     | 0.00025058 | 0.01893892 | 0.49849311 | 0.96554492 | 1.67541578 | 12  |
| REGULATION_OF_CELL_CELL_ADHESION                                        | GOBP     | 0.00025291 | 0.01898395 | 0.49849311 | 0.68848253 | 1.4088584  | 210 |
| RHO_GTPASES_ACTIVATE_IQGA                                               | REACTOME | 0.00025711 | 0.01916817 | 0.49849311 | -0.851268  | -2.1397247 | 19  |
| NATURAL_KILLER_CELL_CYTOKINE_PRODUCTION                                 | GOBP     | 0.00026378 | 0.01953193 | 0.49849311 | 0.99914229 | 1.37327609 | 2   |
| FIBROBLAST_PROLIFERATION                                                | GOBP     | 0.00026874 | 0.01976568 | 0.49849311 | 0.8226959  | 1.62650767 | 58  |
| PROTEIN_COMPLEX_OIGOMERIZATION                                          | GOBP     | 0.00027195 | 0.01986895 | 0.49849311 | 0.72964618 | 1.48343023 | 147 |
| POSITIVE_REGULATION_OF_LEUKOCYTE_PROLIFERATION                          | GOBP     | 0.00027425 | 0.01990426 | 0.49849311 | 0.80988097 | 1.59922901 | 56  |
| DAP12_INTERACTIONS                                                      | REACTOME | 0.00028478 | 0.02053225 | 0.49849311 | 0.926882   | 1.68498558 | 20  |
| POSITIVE_REGULATION_OF_LEUKOCYTE_CELL_CELL_ADHESION                     | GOBP     | 0.00028768 | 0.02059198 | 0.49849311 | 0.7527351  | 1.52190147 | 114 |
| NEGATIVE_REGULATION_OF_MULTICELLULAR_ORGANISMAL_PROCESS                 | GOBP     | 0.00028937 | 0.02059198 | 0.49849311 | 0.62006421 | 1.28841835 | 493 |
| POSITIVE_REGULATION_OF_EXOCYTOSIS                                       | GOBP     | 0.00029131 | 0.02059665 | 0.49849311 | 0.84139001 | 1.65311066 | 51  |
| GAMMA_AMINOBUTYRIC_ACID_BIOSYNTHETIC_PROCESS                            | GOBP     | 0.00029812 | 0.02094295 | 0.49849311 | 0.99195777 | 1.53217501 | 5   |
| NEGATIVE_REGULATION_OF_RESPONSE_TO_EXTERNAL_STIMULUS                    | GOBP     | 0.00030821 | 0.02138036 | 0.49849311 | 0.70822397 | 1.44668075 | 186 |
| DENDRITIC_CELL_ANTIGEN_PROCESSING_AND_PRESENTATION                      | GOBP     | 0.00031079 | 0.02138036 | 0.49849311 | 0.99902302 | 1.43290946 | 3   |
| REGULATION_OF_DENDRITIC_CELL_ANTIGEN_PROCESSING_AND_PRESENTATION        | GOBP     | 0.00031079 | 0.02138036 | 0.49849311 | 0.99902302 | 1.43290946 | 3   |
| REGULATION_OF_HEMOPOIESIS                                               | GOBP     | 0.00031215 | 0.02138036 | 0.49849311 | 0.69937771 | 1.43156475 | 197 |

|                                                                |          |            |            |            |            |            |     |
|----------------------------------------------------------------|----------|------------|------------|------------|------------|------------|-----|
| CELL_CHEMOTAXIS                                                | GOBP     | 0.00031435 | 0.02139719 | 0.49849311 | 0.75305321 | 1.52333958 | 101 |
| ABC_TRANSPORTER_DISORDERS                                      | REACTOME | 0.00033815 | 0.02287506 | 0.49849311 | 0.79779828 | 1.58197636 | 64  |
| PROTECTION_FROM_NATURAL_KILLER_CELL_MEDIATED_CYTOTOXICITY      | GOBP     | 0.00034276 | 0.02304449 | 0.49849311 | 0.99897066 | 1.43283437 | 3   |
| NEGATIVE_REGULATION_OF_INNATE_IMMUNE_RESPONSE                  | GOBP     | 0.00035399 | 0.02365479 | 0.49849311 | 0.842927   | 1.63770676 | 41  |
| NEGATIVE_REGULATION_OF_LEUKOCYTE_CELL_CELL_ADHESION            | GOBP     | 0.00036236 | 0.02406739 | 0.49849311 | 0.81930418 | 1.61161289 | 52  |
| REGULATION_OF_RESPONSE_TO_BIOTIC_STIMULUS                      | GOBP     | 0.00037139 | 0.02451844 | 0.49849311 | 0.67745237 | 1.38952039 | 243 |
| T_CELL_ACTIVATION_INVOLVED_IN_IMMUNE_RESPONSE                  | GOBP     | 0.00037775 | 0.02478888 | 0.49849311 | 0.84037969 | 1.64332412 | 44  |
| POSITIVE_REGULATION_OF_NEUTROPHIL_MIGRATION                    | GOBP     | 0.00038404 | 0.02505196 | 0.49849311 | 0.94973905 | 1.66246512 | 14  |
| ENDOCYTOSIS                                                    | KEGG     | 0.00042491 | 0.0274694  | 0.49849311 | 0.73811092 | 1.49684332 | 130 |
| COPI_INDEPENDENT_GOLGI_TO_ER_RETROGRADE_TRAFFIC                | REACTOME | 0.00042612 | 0.0274694  | 0.49849311 | -0.7123353 | -1.8865268 | 39  |
| HYPERSENSITIVITY                                               | GOBP     | 0.00043765 | 0.02772365 | 0.49849311 | 0.99889467 | 1.37293574 | 2   |
| POSITIVE_REGULATION_OF_HYPERSENSITIVITY                        | GOBP     | 0.00043765 | 0.02772365 | 0.49849311 | 0.99889467 | 1.37293574 | 2   |
| REGULATION_OF_HYPERSENSITIVITY                                 | GOBP     | 0.00043765 | 0.02772365 | 0.49849311 | 0.99889467 | 1.37293574 | 2   |
| POSITIVE_REGULATION_OF_CELL_DEVELOPMENT                        | GOBP     | 0.00045797 | 0.0287375  | 0.49849311 | 0.68131786 | 1.3958098  | 223 |
| REGULATION_OF_VIRAL_PROCESS                                    | GOBP     | 0.0004612  | 0.0287375  | 0.49849311 | 0.75081083 | 1.51554403 | 95  |
| 14_3_3_PROTEIN_BINDING                                         | GOMF     | 0.00046152 | 0.0287375  | 0.49849311 | 0.87502463 | 1.65525624 | 28  |
| NEGATIVE_REGULATION_OF_SIGNAL_TRANSDUCTION_BY_P53_CLASS_1      | GOBP     | 0.00047402 | 0.02934886 | 0.49849311 | 0.8878772  | 1.64445794 | 23  |
| LEUKOCYTE_MIGRATION                                            | GOBP     | 0.00049345 | 0.03038069 | 0.47727082 | 0.72474906 | 1.46951832 | 139 |
| REGULATION_OF_CELL_DEVELOPMENT                                 | GOBP     | 0.00049916 | 0.03056043 | 0.47727082 | 0.62647095 | 1.29801717 | 422 |
| RESPIRATORY_ELECTRON_TRANSPORT_ATP_SYNTHESIS_BY_CHEMIOSM       | REACTOME | 0.0005161  | 0.03133181 | 0.47727082 | -0.4580324 | -1.5865457 | 123 |
| REGULATION_OF_VESICLE_MEDIATED_TRANSPORT                       | GOBP     | 0.00051748 | 0.03133181 | 0.47727082 | 0.64726496 | 1.3356734  | 315 |
| NEGATIVE_REGULATION_OF_RESPONSE_TO_BIOTIC_STIMULUS             | GOBP     | 0.00052696 | 0.03168577 | 0.47727082 | 0.78066399 | 1.55632561 | 72  |
| POSITIVE_REGULATION_OF_PEPTIDYL_TYROSINE_PHOSPHORYLATION       | GOBP     | 0.00052911 | 0.03168577 | 0.47727082 | 0.77896399 | 1.55169133 | 69  |
| POST_CHAPERONIN_TUBULIN_FOLDING_PATHWAY                        | REACTOME | 0.00053834 | 0.03206331 | 0.47727082 | -0.8990667 | -2.0819403 | 14  |
| POSITIVE_REGULATION_OF_RESPONSE_TO_BIOTIC_STIMULUS             | GOBP     | 0.00055467 | 0.03285735 | 0.47727082 | 0.68943536 | 1.40460341 | 162 |
| POSITIVE_REGULATION_OF_CHEMOKINE_PRODUCTION                    | GOBP     | 0.00056365 | 0.0330772  | 0.47727082 | 0.88534723 | 1.63977213 | 23  |
| NEUTROPHIL_CHEMOTAXIS                                          | GOBP     | 0.00056442 | 0.0330772  | 0.47727082 | 0.87162988 | 1.6488345  | 28  |
| IMMUNE_RECEPTOR_ACTIVITY                                       | GOMF     | 0.00057237 | 0.03336504 | 0.47727082 | 0.91757004 | 1.66805731 | 20  |
| T_CELL_ACTIVATION                                              | GOBP     | 0.00059075 | 0.03408006 | 0.47727082 | 0.66798079 | 1.3695423  | 240 |
| CELLULAR_RESPONSE_TO_COPPER_ION                                | GOBP     | 0.00059086 | 0.03408006 | 0.47727082 | -0.8982422 | -2.080031  | 14  |
| POSITIVE_REGULATION_OF_I_KAPPA_B_KINASE_NF_KAPPA_B_SIGNALING   | GOBP     | 0.00059731 | 0.034272   | 0.47727082 | 0.713881   | 1.44385547 | 121 |
| RESPONSE_TO_MOLECULE_OF_BACTERIAL_ORIGIN                       | GOBP     | 0.00060171 | 0.03434454 | 0.47727082 | 0.71363129 | 1.45153852 | 146 |
| REGULATION_OF_INNATE_IMMUNE_RESPONSE                           | GOBP     | 0.00060907 | 0.03458425 | 0.47727082 | 0.69040305 | 1.41207746 | 195 |
| ALLOGRAFT_REJECTION                                            | KEGG     | 0.00061308 | 0.03459851 | 0.47727082 | 0.9834309  | 1.59984666 | 7   |
| TRANSPORT_OF_CONNEXONS_TO_THE_PLASMA_MEMBRANE                  | REACTOME | 0.00061563 | 0.03459851 | 0.47727082 | -0.9513684 | -1.9368272 | 8   |
| NEGATIVE_REGULATION_OF_T_CELL_DIFFERENTIATION                  | GOBP     | 0.00062322 | 0.03484642 | 0.47727082 | 0.92683797 | 1.66489161 | 18  |
| SIGNALING_RECEPTOR_REGULATOR_ACTIVITY                          | GOMF     | 0.00063435 | 0.03528881 | 0.47727082 | 0.72192926 | 1.45966121 | 123 |
| REGULATION_OF_LEUKOCYTE_PROLIFERATION                          | GOBP     | 0.00065025 | 0.03599027 | 0.47727082 | 0.74288759 | 1.50277572 | 101 |
| B_CELL_HOMEOSTASIS                                             | GOBP     | 0.00066354 | 0.03654162 | 0.47727082 | 0.91502544 | 1.66343146 | 20  |
| NORADRENERGIC_NEURON_DIFFERENTIATION                           | GOBP     | 0.00066899 | 0.03665735 | 0.47727082 | 0.98806048 | 1.52615527 | 5   |
| NEGATIVE_REGULATION_OF_IMMUNE_EFFECTOR_PROCESS                 | GOBP     | 0.00067258 | 0.03667054 | 0.47727082 | 0.84524496 | 1.64153165 | 40  |
| CELL_ADHESION_MOLECULES_CAMS                                   | KEGG     | 0.00068141 | 0.03678599 | 0.47727082 | 0.83823369 | 1.64657089 | 49  |
| REGULATION_OF_FIBROBLAST_PROLIFERATION                         | GOBP     | 0.00068141 | 0.03678599 | 0.47727082 | 0.83820132 | 1.64650731 | 49  |
| DETOXIFICATION                                                 | GOBP     | 0.00069301 | 0.03711244 | 0.47727082 | -0.6056543 | -1.8146394 | 66  |
| POSITIVE_REGULATION_OF_CALCIUM_ION_DEPENDENT_EXOCYTOSIS        | GOBP     | 0.00069423 | 0.03711244 | 0.47727082 | 0.95832453 | 1.63379761 | 10  |
| MYELOID_LEUKOCYTE_ACTIVATION                                   | GOBP     | 0.00070701 | 0.03746834 | 0.47727082 | 0.75577208 | 1.51983123 | 88  |
| NEGATIVE_REGULATION_OF_SECRETION                               | GOBP     | 0.00070772 | 0.03746834 | 0.47727082 | 0.77381894 | 1.55110642 | 82  |
| MULTICELLULAR_ORGANISMAL_LEVEL_HOMEOSTASIS                     | GOBP     | 0.00071897 | 0.0378808  | 0.47727082 | 0.6373337  | 1.32021132 | 396 |
| CIRCULATORY_SYSTEM_PROCESS                                     | GOBP     | 0.00073729 | 0.03866004 | 0.47727082 | 0.65899815 | 1.35253927 | 252 |
| LEUKOCYTE_DIFFERENTIATION                                      | GOBP     | 0.00074645 | 0.0389539  | 0.47727082 | 0.66198218 | 1.36392315 | 280 |
| POSITIVE_REGULATION_OF_FIBROBLAST_PROLIFERATION                | GOBP     | 0.00075172 | 0.03904311 | 0.47727082 | 0.88595403 | 1.65512794 | 25  |
| POSITIVE_REGULATION_OF_LIPID_BIOSYNTHETIC_PROCESS              | GOBP     | 0.00076878 | 0.0396683  | 0.47727082 | 0.83450271 | 1.62599929 | 42  |
| MHC_PROTEIN_COMPLEX_BINDING                                    | GOMF     | 0.000771   | 0.0396683  | 0.47727082 | 0.95185242 | 1.65165652 | 12  |
| NEGATIVE_REGULATION_OF_IMMUNE_RESPONSE                         | GOBP     | 0.00078095 | 0.03984481 | 0.47727082 | 0.76585827 | 1.53610569 | 84  |
| REGULATION_OF_UNSATURATED_FATTY_ACID_BIOSYNTHETIC_PROCESS      | GOBP     | 0.00078533 | 0.03984481 | 0.47727082 | 0.98691775 | 1.52439021 | 5   |
| REGULATION_OF_ANTIGEN_PROCESSING_AND_PRESENTATION              | GOBP     | 0.00078533 | 0.03984481 | 0.47727082 | 0.98691266 | 1.52438235 | 5   |
| LYMPHOCYTE_HOMEOSTASIS                                         | GOBP     | 0.00078985 | 0.03988902 | 0.47727082 | 0.85041391 | 1.63379891 | 33  |
| NEUTROPHIL_MIGRATION                                           | GOBP     | 0.00080614 | 0.04052503 | 0.47727082 | 0.84239506 | 1.63317914 | 38  |
| LEUKOCYTE_PROLIFERATION                                        | GOBP     | 0.00081627 | 0.04084689 | 0.47727082 | 0.71583605 | 1.45144608 | 139 |
| CYTOKINE_RECEPTOR_ACTIVITY                                     | GOMF     | 0.00082924 | 0.0413076  | 0.47727082 | 0.92368851 | 1.65923418 | 18  |
| INTERLEUKIN_6_PRODUCTION                                       | GOBP     | 0.0008356  | 0.04143602 | 0.47727082 | 0.81618105 | 1.60979485 | 55  |
| POSITIVE_REGULATION_OF_DEFENSE_RESPONSE                        | GOBP     | 0.00084719 | 0.04182161 | 0.47727082 | 0.69189825 | 1.41671075 | 201 |
| REGULATION_OF_LIPID_BIOSYNTHETIC_PROCESS                       | GOBP     | 0.00086238 | 0.04238053 | 0.47727082 | 0.73759674 | 1.48887083 | 95  |
| CROSS_PRESENTATION_OF_SOLUBLE_EXOGENOUS_ANTIGENS_ENDOSOMIAL    | REACTOME | 0.00087474 | 0.04279574 | 0.47727082 | 0.83886733 | 1.63541344 | 43  |
| MHC_CLASS_II_PROTEIN_COMPLEX_BINDING                           | GOMF     | 0.00090307 | 0.04398558 | 0.47727082 | 0.95919523 | 1.6478986  | 11  |
| NEGATIVE_REGULATION_OF_DNA_DAMAGE_RESPONSE_SIGNAL_TRANSDUCTION | GOBP     | 0.0009242  | 0.04481529 | 0.47727082 | 0.95884994 | 1.6473036  | 11  |
| T_CELL_DIFFERENTIATION                                         | GOBP     | 0.00097129 | 0.04689148 | 0.47727082 | 0.70806086 | 1.43800746 | 142 |
| POSITIVE_REGULATION_OF_LOCOMOTION                              | GOBP     | 0.00098485 | 0.04733741 | 0.45505987 | 0.65424598 | 1.34697933 | 276 |
| CENTRAL_NERVOUS_SYSTEM_NEURON_DIFFERENTIATION                  | GOBP     | 0.00099178 | 0.0474626  | 0.45505987 | 0.76285162 | 1.53971525 | 92  |
| REGULATION_OF_LEUKOCYTE_MIGRATION                              | GOBP     | 0.00101338 | 0.04807621 | 0.45505987 | 0.76321731 | 1.53156087 | 85  |
| POSITIVE_REGULATION_OF_HEMOPOIESIS                             | GOBP     | 0.00101338 | 0.04807621 | 0.45505987 | 0.76304829 | 1.5312217  | 85  |
| MITOCHONDRIAL_ELECTRON_TRANSPORT_CYTOCHROME_C_TO_OXYGEN        | GOBP     | 0.00103864 | 0.04891898 | 0.45505987 | -0.8116385 | -2.0401132 | 19  |
| RESPONSE_TO_LIPID                                              | GOBP     | 0.00104007 | 0.04891898 | 0.45505987 | 0.62263527 | 1.29080347 | 439 |
| ABC_TYPE_TRANSPORTER_ACTIVITY                                  | GOMF     | 0.0010973  | 0.05139021 | 0.45505987 | 0.88494522 | 1.66509256 | 27  |
| NEGATIVE_REGULATION_OF_HEMOPOIESIS                             | GOBP     | 0.00114207 | 0.0532594  | 0.45505987 | 0.82004699 | 1.60377389 | 45  |
| GAP_JUNCTION_TRAFFICKING_AND_REGULATION                        | REACTOME | 0.00116689 | 0.05418637 | 0.45505987 | -0.8061238 | -2.0262515 | 19  |
| DETECTION_OF_EXTERNAL_BIOTIC_STIMULUS                          | GOBP     | 0.00122767 | 0.05647927 | 0.45505987 | 0.98300468 | 1.5183461  | 5   |
| GRAFT_VERSUS_HOST_DISEASE                                      | KEGG     | 0.00123229 | 0.05647927 | 0.45505987 | 0.98652429 | 1.57597052 | 6   |
| REGULATION_OF_CALCIUM_ION_DEPENDENT_EXOCYTOSIS                 | GOBP     | 0.00123312 | 0.05647927 | 0.45505987 | 0.86862327 | 1.60879729 | 23  |
| LEUKOCYTE_DEGRANULATION                                        | GOBP     | 0.00123689 | 0.05647927 | 0.45505987 | 0.84081686 | 1.61536124 | 33  |
| SALT_TRANSMEMBRANE_TRANSPORTER_ACTIVITY                        | GOMF     | 0.00126096 | 0.05733985 | 0.45505987 | 0.66920508 | 1.36988887 | 212 |

|                                                             |          |            |            |            |            |            |     |
|-------------------------------------------------------------|----------|------------|------------|------------|------------|------------|-----|
| TUBE_MORPHOGENESIS                                          | GOBP     | 0.00127937 | 0.05793652 | 0.45505987 | 0.6213199  | 1.28707175 | 385 |
| LEUKOCYTE_CHEMOTAXIS                                        | GOBP     | 0.00130147 | 0.05865346 | 0.45505987 | 0.77310071 | 1.54326558 | 77  |
| POSITIVE_REGULATION_OF_FATTY_ACID_METABOLIC_PROCESS         | GOBP     | 0.00130591 | 0.05865346 | 0.45505987 | 0.89733055 | 1.62418801 | 19  |
| CARBOXYTERMINAL_POST_TRANSLATIONAL_MODIFICATIONS_OF_TUBU    | REACTOME | 0.0013439  | 0.05984737 | 0.45505987 | -0.7623789 | -1.9189135 | 24  |
| NEGATIVE_REGULATION_OF_NEURON_DEATH                         | GOBP     | 0.00134806 | 0.05984737 | 0.45505987 | 0.7224059  | 1.46120826 | 125 |
| GAP_JUNCTION_ASSEMBLY                                       | REACTOME | 0.00134887 | 0.05984737 | 0.45505987 | -0.9384188 | -1.9947165 | 9   |
| MYELOID_LEUKOCYTE_MIGRATION                                 | GOBP     | 0.00136666 | 0.0601172  | 0.45505987 | 0.76434681 | 1.53211971 | 82  |
| ANTIBACTERIAL_HUMORAL_RESPONSE                              | GOBP     | 0.00136797 | 0.0601172  | 0.45505987 | 0.98156183 | 1.51611748 | 5   |
| TAXIS                                                       | GOBP     | 0.00137141 | 0.0601172  | 0.45505987 | 0.65861913 | 1.35018635 | 229 |
| NEUTROPHIL_DEGRANULATION                                    | REACTOME | 0.00138982 | 0.0603875  | 0.45505987 | 0.64176246 | 1.32258187 | 303 |
| REGULATION_OF_NEUTROPHIL_MIGRATION                          | GOBP     | 0.00139753 | 0.0603875  | 0.45505987 | 0.91384944 | 1.64156013 | 18  |
| REGULATION_OF_GRANULOCYTE_CHEMOTAXIS                        | GOBP     | 0.0013991  | 0.0603875  | 0.45505987 | 0.91992927 | 1.64615302 | 17  |
| ABC_TRANSPORTERS                                            | KEGG     | 0.00139962 | 0.0603875  | 0.45505987 | 0.88713185 | 1.63529494 | 22  |
| POSITIVE_REGULATION_OF_B_CELL_ACTIVATION                    | GOBP     | 0.00141079 | 0.0606307  | 0.45505987 | 0.81595408 | 1.59576936 | 45  |
| OXIDOREDUCTION_DRIVEN_ACTIVE_TRANSMEMBRANE_TRANSPORTER      | GOMF     | 0.00142899 | 0.06117303 | 0.45505987 | -0.5770997 | -1.7211461 | 67  |
| VIRAL_LIFE_CYCLE                                            | GOBP     | 0.00146345 | 0.06240452 | 0.45505987 | 0.66729497 | 1.36450047 | 194 |
| NEGATIVE_T_CELL_SELECTION                                   | GOBP     | 0.00148047 | 0.06270153 | 0.45505987 | 0.99753249 | 1.37106348 | 2   |
| VIRAL_PROCESS                                               | GOBP     | 0.00148186 | 0.06270153 | 0.45505987 | 0.63954    | 1.31802518 | 283 |
| REGULATION_OF_INTRINSIC_APOPTOTIC_SIGNALING_PATHWAY_BY_P5   | GOBP     | 0.00152712 | 0.06396166 | 0.45505987 | 0.88823663 | 1.6256521  | 21  |
| POSITIVE_REGULATION_OF_CHEMOTAXIS                           | GOBP     | 0.00154033 | 0.06396166 | 0.45505987 | 0.81239403 | 1.5965879  | 50  |
| REGULATION_OF_T_CELL_ACTIVATION                             | GOBP     | 0.0015417  | 0.06396166 | 0.45505987 | 0.6929812  | 1.3403287  | 158 |
| NEGATIVE_REGULATION_OF_CELL_DIFFERENTIATION                 | GOBP     | 0.00155549 | 0.06396166 | 0.45505987 | 0.6414604  | 1.32420401 | 325 |
| T_CELL_RECEPTOR_BINDING                                     | GOMF     | 0.00155598 | 0.06396166 | 0.45505987 | 0.98937793 | 1.46159057 | 4   |
| ATPASE_COUPLED_TRANSMEMBRANE_TRANSPORTER_ACTIVITY           | GOMF     | 0.00155758 | 0.06396166 | 0.45505987 | 0.79442329 | 1.57061141 | 58  |
| ANTIBODY_DEPENDENT_CELLULAR_CYTOTOXICITY                    | GOBP     | 0.00156417 | 0.06396166 | 0.45505987 | 0.9990566  | 1.31162729 | 1   |
| TYPE_II_HYPERSENSITIVITY                                    | GOBP     | 0.00156417 | 0.06396166 | 0.45505987 | 0.9990566  | 1.31162729 | 1   |
| NATURAL_KILLER_CELL_LECTIN_LIKE_RECEPTOR_BINDING            | GOMF     | 0.00156417 | 0.06396166 | 0.45505987 | 0.9990566  | 1.31162729 | 1   |
| POSITIVE_REGULATION_OF_LYMPHOCYTE_DIFFERENTIATION           | GOBP     | 0.00157323 | 0.06409309 | 0.45505987 | 0.78798059 | 1.55944618 | 61  |
| SCF_SKP2_MEDIATED_DEGRADATION_OF_P27_P21                    | REACTOME | 0.00163601 | 0.06640363 | 0.45505987 | 0.78950175 | 1.55299    | 52  |
| POSITIVE_REGULATION_OF_GRANULOCYTE_CHEMOTAXIS               | GOBP     | 0.00165031 | 0.06673698 | 0.45505987 | 0.96264652 | 1.60671115 | 9   |
| POSITIVE_REGULATION_OF_MYELOID_LEUKOCYTE_CYTOKINE_PRODUCT   | GOBP     | 0.00166855 | 0.06700943 | 0.45505987 | 0.91666564 | 1.64031298 | 17  |
| HOMEOSTASIS_OF_NUMBER_OF_CELLS                              | GOBP     | 0.00166927 | 0.06700943 | 0.45505987 | 0.67775237 | 1.38189987 | 176 |
| B_CELL_PROLIFERATION                                        | GOBP     | 0.00169362 | 0.06773859 | 0.45505987 | 0.82320602 | 1.59029122 | 35  |
| POSITIVE_REGULATION_OF_CD8_POSITIVE_ALPHA_BETA_T_CELL_ACTIV | GOBP     | 0.00172103 | 0.06858456 | 0.45505987 | 0.9957813  | 1.42825983 | 3   |
| POSITIVE_REGULATION_OF_B_CELL_PROLIFERATION                 | GOBP     | 0.00173778 | 0.06900101 | 0.45505987 | 0.89037188 | 1.61159266 | 19  |
| REGULATION_OF_LYMPHOCYTE_DIFFERENTIATION                    | GOBP     | 0.00177036 | 0.06977571 | 0.45505987 | 0.73304704 | 1.4798023  | 96  |
| POSITIVE_REGULATION_OF_LEUKOCYTE_MIGRATION                  | GOBP     | 0.00177617 | 0.06977571 | 0.45505987 | 0.80420239 | 1.58353736 | 54  |
| REGULATION_OF_SECRETION                                     | GOBP     | 0.00177639 | 0.06977571 | 0.45505987 | 0.63108194 | 1.30250516 | 331 |
| NEGATIVE_REGULATION_OF_INTRINSIC_APOPTOTIC_SIGNALING_PATHW  | GOBP     | 0.00184266 | 0.07212031 | 0.45505987 | 0.91850984 | 1.63341001 | 16  |
| NEUROPEPTIDE_RECEPTOR_BINDING                               | GOMF     | 0.00186396 | 0.07268285 | 0.45505987 | 0.94394907 | 1.60928964 | 10  |
| REGULATION_OF_BODY_FLUID_LEVELS                             | GOBP     | 0.0018703  | 0.07268285 | 0.45505987 | 0.68074762 | 1.38612309 | 159 |
| POSITIVE_REGULATION_OF_VIRAL_LIFE_CYCLE                     | GOBP     | 0.0019102  | 0.07397132 | 0.45505987 | 0.92521821 | 1.61954276 | 14  |
| POSITIVE_REGULATION_OF_INTERLEUKIN_8_PRODUCTION             | GOBP     | 0.00196933 | 0.0759924  | 0.4317077  | 0.84969838 | 1.58241326 | 24  |
| INORGANIC_ANION_TRANSPORT                                   | GOBP     | 0.00198404 | 0.07629174 | 0.4317077  | 0.75047326 | 1.49607308 | 71  |
| NEGATIVE_REGULATION_OF_TRANSPORT                            | GOBP     | 0.00201642 | 0.07726541 | 0.4317077  | 0.65159304 | 1.3364804  | 243 |
| CELL_DIFFERENTIATION_IN_SPINAL_CORD                         | GOBP     | 0.00204625 | 0.07813548 | 0.4317077  | 0.88786852 | 1.60706154 | 19  |
| REGULATION_OF_LEUKOCYTE_CHEMOTAXIS                          | GOBP     | 0.00206396 | 0.07846905 | 0.4317077  | 0.81212578 | 1.5880749  | 44  |
| ATP_ACTIVATED_INWARD_RECTIFIER_POTASSIUM_CHANNEL_ACTIVITY   | GOMF     | 0.00207054 | 0.07846905 | 0.4317077  | 0.98809126 | 1.4596898  | 4   |
| ANTIMICROBIAL_HUMORAL_RESPONSE                              | GOBP     | 0.00207906 | 0.07846905 | 0.4317077  | 0.92269051 | 1.61511817 | 14  |
| ATPASE_REGULATOR_ACTIVITY                                   | GOMF     | 0.00208363 | 0.07846905 | 0.4317077  | -0.6478118 | -1.7752061 | 42  |
| NORADRENERGIC_NEURON_DEVELOPMENT                            | GOBP     | 0.00211955 | 0.07954834 | 0.4317077  | 0.98787035 | 1.45936345 | 4   |
| NEURON_DEATH                                                | GOBP     | 0.00212741 | 0.07957089 | 0.4317077  | 0.66627401 | 1.36528949 | 224 |
| GABA_SYNTHESIS_RELEASE_REUPTAKE_AND_DEGRADATION             | REACTOME | 0.00215472 | 0.08008458 | 0.4317077  | 0.9355791  | 1.62514876 | 13  |
| WATER_TRANSPORT                                             | GOBP     | 0.00216302 | 0.08008458 | 0.4317077  | 0.9769471  | 1.50898958 | 5   |
| INTRAFLAGELLAR_TRANSPORT                                    | REACTOME | 0.00216647 | 0.08008458 | 0.4317077  | -0.6475298 | -1.8032577 | 43  |
| INTERLEUKIN_18_SIGNALING                                    | REACTOME | 0.00217037 | 0.08008458 | 0.4317077  | 0.99703568 | 1.37038064 | 2   |
| LEUKOCYTE_HOMEOSTASIS                                       | GOBP     | 0.00217969 | 0.08015329 | 0.4317077  | 0.79598503 | 1.55966187 | 47  |
| EXTRACELLULAR_MATRIX_STRUCTURAL_CONSTITUENT_CONFERRING_C    | GOMF     | 0.00218686 | 0.08015329 | 0.4317077  | 0.99473274 | 1.42675588 | 3   |
| B_CELL_ACTIVATION                                           | GOBP     | 0.00221691 | 0.08098359 | 0.4317077  | 0.70017096 | 1.41967551 | 133 |
| POSITIVE_REGULATION_OF_INTERLEUKIN_6_PRODUCTION             | GOBP     | 0.00227581 | 0.08285912 | 0.4317077  | 0.81621592 | 1.57678757 | 35  |
| T_CELL_DIFFERENTIATION_IN_THYMUS                            | GOBP     | 0.00229542 | 0.08292466 | 0.4317077  | 0.80446186 | 1.56297358 | 41  |
| CHEMOKINE_C_X_C_MOTIF_LIGAND_2_PRODUCTION                   | GOBP     | 0.00230648 | 0.08292466 | 0.4317077  | 0.95824154 | 1.59935898 | 9   |
| UREA_TRANSMEMBRANE_TRANSPORT                                | GOBP     | 0.00230788 | 0.08292466 | 0.4317077  | 0.99854202 | 1.31095171 | 1   |
| UREA_TRANSMEMBRANE_TRANSPORTER_ACTIVITY                     | GOMF     | 0.00230788 | 0.08292466 | 0.4317077  | 0.99854202 | 1.31095171 | 1   |
| RESPONSE_TO_GROWTH_FACTOR                                   | GOBP     | 0.00234939 | 0.08414054 | 0.4317077  | 0.61835212 | 1.28077931 | 378 |
| T_CELL_CYTOKINE_PRODUCTION                                  | GOBP     | 0.00239543 | 0.08550978 | 0.4317077  | 0.91014343 | 1.6286419  | 17  |
| THE_ROLE_OF_NEF_IN_HIV_1_REPLICATION_AND_DISEASE_PATHOGENE  | REACTOME | 0.00241889 | 0.08606679 | 0.4317077  | 0.88031372 | 1.61115157 | 21  |
| ANTIGEN_PROCESSING_AND_PRESENTATION_OF_PEPTIDE_OR_POLYSAI   | GOBP     | 0.00243933 | 0.08651336 | 0.4317077  | 0.92055865 | 1.61138647 | 14  |
| CELLULAR_RESPONSE_TO_ELECTRICAL_STIMULUS                    | GOBP     | 0.00254907 | 0.09011365 | 0.4317077  | -0.97323   | -1.71718   | 5   |
| MODIFIED_AMINO_ACID_BINDING                                 | GOMF     | 0.00260133 | 0.09166564 | 0.4317077  | 0.81958931 | 1.58896488 | 38  |
| I_KAPPAB_KINASE_NF_KAPPAB_SIGNALING                         | GOBP     | 0.00261099 | 0.09171086 | 0.4317077  | 0.67392426 | 1.37608067 | 183 |
| PHOSPHATIDYLSERINE_BINDING                                  | GOMF     | 0.00269885 | 0.09399925 | 0.4317077  | 0.85195293 | 1.61854376 | 29  |
| POSITIVE_REGULATION_OF_NATURAL_KILLER_CELL_MEDIATED_CYTOTO  | GOBP     | 0.00270187 | 0.09399925 | 0.4317077  | 0.95613764 | 1.59584746 | 9   |
| POSITIVE_REGULATION_OF_NATURAL_KILLER_CELL_MEDIATED_IMMUN   | GOBP     | 0.00270187 | 0.09399925 | 0.4317077  | 0.95613764 | 1.59584746 | 9   |
| NITRIC_OXIDE_SYNTHASE_BINDING                               | GOMF     | 0.00274925 | 0.09534507 | 0.4317077  | 0.97006198 | 1.57809808 | 7   |
| NEGATIVE_REGULATION_OF_CELLULAR_RESPONSE_TO_OXIDATIVE_STR   | GOBP     | 0.00280279 | 0.09689525 | 0.4317077  | 0.99655676 | 1.36972239 | 2   |
| NEGATIVE_REGULATION_OF_PEPTIDE_SECRETION                    | GOBP     | 0.00281704 | 0.09708166 | 0.4317077  | 0.85120351 | 1.61712001 | 29  |
| CELLULAR_OXIDANT_DETOXIFICATION                             | GOBP     | 0.00285193 | 0.09797579 | 0.4317077  | -0.5732717 | -1.6805773 | 52  |
| NEGATIVE_REGULATION_OF_MITOCHONDRION_ORGANIZATION           | GOBP     | 0.00289098 | 0.09873613 | 0.4317077  | -0.6236791 | -1.7544223 | 44  |
| B_CELL_APOPTOTIC_PROCESS                                    | GOBP     | 0.00289208 | 0.09873613 | 0.4317077  | 0.90178026 | 1.6198801  | 18  |
| INORGANIC_ANION_TRANSMEMBRANE_TRANSPORTER_ACTIVITY          | GOMF     | 0.00290359 | 0.0988213  | 0.4317077  | 0.78730849 | 1.54702328 | 48  |

**Supplemental Table 8: Differentially expressed genes from DESeq which overlap known T1D or T2D risk loci**

| <b>T1D DEG Overlapping T1D Risk</b> | <b>T2D DEG Overlapping T2D Risk</b> |
|-------------------------------------|-------------------------------------|
| CNPY2                               | TMED6                               |
| H19                                 | UNC5B                               |
| TNFAIP3                             | ASCL2                               |
| ATF3                                | WNT3                                |
| ASGR1                               | FSTL4                               |
| DDX59                               | TRA2A                               |
| MEG3                                | FOCAD-AS1                           |
| INS                                 |                                     |
| ACADVL                              |                                     |
| PTP4A3                              |                                     |
| ICAM1                               |                                     |
| PPY                                 |                                     |
| SEL1L3                              |                                     |
| MLLT6                               |                                     |
| CYB5D2                              |                                     |
| KCNQ1OT1                            |                                     |
| ASCL2                               |                                     |
| RSRP1                               |                                     |
| BCAT2                               |                                     |
| DLK1                                |                                     |
| FIGN                                |                                     |
| FLT3LG                              |                                     |
| ANKRD37                             |                                     |
| CA8                                 |                                     |
| RASGRF1                             |                                     |
| PTRHD1                              |                                     |
| NRP1                                |                                     |
| TAF2                                |                                     |
| PDLIM4                              |                                     |
| PES1                                |                                     |
| MTFP1                               |                                     |
| CS                                  |                                     |
| MAGI3                               |                                     |
| DCAF5                               |                                     |
| RGS2                                |                                     |
| BAZ2A                               |                                     |
| SMARCC2                             |                                     |
| ZC3H8                               |                                     |
| DDC                                 |                                     |
| ZZEF1                               |                                     |
| CDC37L1-DT                          |                                     |
| ZC3H4                               |                                     |
| LINC00623                           |                                     |
| POLR2A                              |                                     |
| PHC1                                |                                     |
| ZNF740                              |                                     |
| ZC3H10                              |                                     |
| PHF23                               |                                     |

PFDN5  
CARM1  
NPAS2  
NUBP1  
EMSY  
SNX25  
ACAD10  
PRR12  
RBPJ  
MPST  
SOCS1  
PAPOLG  
KRI1  
SLC25A4  
DTNB  
ZNF281  
ITGB8  
ACSL6  
DDIT4  
ARFGEF3  
NCBP3  
PHLDA2  
KDM6B  
NAA40  
MYBBP1A  
MICALL1  
FBLN7  
MTMR3  
COL6A1  
APOH  
EFNB3  
GCAT  
RAPGEF6  
NOSIP  
SH2B3  
TRIOBP  
KIF20B  
CDKN2D  
PPP2R5C  
RPL19  
ZC3H6  
DNMT1  
KANSL1  
FNIP1  
FTL  
FCGRT  
GABARAPL2  
COX8A  
SRSF5  
PA2G4

Supplemental Table 9: Significant differentially expressed genes in T2D compared to ND controls

| Cell Type | Gene              | baseMean    | log2FoldChange | lfcSE       | stat         | pvalue      | padj        |
|-----------|-------------------|-------------|----------------|-------------|--------------|-------------|-------------|
| Acinar    | <i>RPS4Y1</i>     | 1444.692075 | 6.528401555    | 1.372238858 | 4.757481918  | 1.96E-06    | 0.022554384 |
| Acinar    | <i>S100A14</i>    | 19.49202037 | 3.022646163    | 0.674445127 | 4.481678408  | 7.41E-06    | 0.038151046 |
| Acinar    | <i>CXCL1</i>      | 72.29174477 | -5.044901488   | 1.14181526  | -4.41831675  | 9.95E-06    | 0.038151046 |
| Alpha     | <i>RPS4Y1</i>     | 757.2556915 | 6.186065813    | 1.325436724 | 4.667190597  | 3.05E-06    | 0.042430888 |
| Beta      | <i>OPLAH</i>      | 11.27265785 | 2.650033573    | 0.465481582 | 5.693100812  | 1.25E-08    | 0.000174105 |
| Beta      | <i>TSHR</i>       | 11.35793837 | 2.393823559    | 0.43971829  | 5.443993609  | 5.21E-08    | 0.000363547 |
| Beta      | <i>RPS4Y1</i>     | 1135.601155 | 6.994905501    | 1.365835864 | 5.12133682   | 3.03E-07    | 0.001242266 |
| Beta      | <i>AC027031.2</i> | 36.0541084  | 1.8019829      | 0.353949878 | 5.091068008  | 3.56E-07    | 0.001242266 |
| Beta      | <i>PROC</i>       | 18.10078649 | -1.921810878   | 0.400747981 | -4.795559723 | 1.62E-06    | 0.004391475 |
| Beta      | <i>SLC4A4</i>     | 20.25323168 | 2.22317656     | 0.466558145 | 4.765057867  | 1.89E-06    | 0.004391475 |
| Beta      | <i>LINC01637</i>  | 34.22893608 | -1.198378734   | 0.259377197 | -4.620216228 | 3.83E-06    | 0.007581642 |
| Beta      | <i>LINC01116</i>  | 28.94256725 | 2.428775858    | 0.528671819 | 4.594108806  | 4.35E-06    | 0.007581642 |
| Beta      | <i>SYT1</i>       | 30.62818397 | 2.800940421    | 0.621876566 | 4.504013457  | 6.67E-06    | 0.009570122 |
| Beta      | <i>AL109613.1</i> | 36.62375683 | -1.388244356   | 0.308631202 | -4.49806872  | 6.86E-06    | 0.009570122 |
| Beta      | <i>STOM</i>       | 41.14313238 | 1.024517299    | 0.229533342 | 4.463479209  | 8.06E-06    | 0.010230944 |
| Beta      | <i>TMED6</i>      | 357.4249678 | -1.885888871   | 0.437828214 | -4.307371726 | 1.65E-05    | 0.01921344  |
| Beta      | <i>TNFRSF11B</i>  | 9.730507182 | 1.91655796     | 0.447990802 | 4.278118999  | 1.88E-05    | 0.020233973 |
| Beta      | <i>GOLT1A</i>     | 163.662211  | -0.986750491   | 0.232228681 | -4.249046621 | 2.15E-05    | 0.021345029 |
| Beta      | <i>CASP7</i>      | 16.68669877 | 1.394937183    | 0.330019314 | 4.226834993  | 2.37E-05    | 0.021345029 |
| Beta      | <i>CHD5</i>       | 19.94557045 | 1.561287663    | 0.370006523 | 4.21962199   | 2.45E-05    | 0.021345029 |
| Beta      | <i>CTNNAL1</i>    | 146.1700429 | 0.809570819    | 0.192721103 | 4.200737787  | 2.66E-05    | 0.021434288 |
| Beta      | <i>UNC5B</i>      | 94.50400817 | 1.475711116    | 0.352026642 | 4.192043843  | 2.76E-05    | 0.021434288 |
| Beta      | <i>RINT1</i>      | 34.65321593 | 0.855112388    | 0.205290522 | 4.165376857  | 3.11E-05    | 0.022831918 |
| Beta      | <i>EML6</i>       | 37.99513898 | 0.953271033    | 0.234814263 | 4.059681138  | 4.91E-05    | 0.034289735 |
| Beta      | <i>CCDC173</i>    | 37.15630465 | 1.32046021     | 0.326708788 | 4.041703985  | 5.31E-05    | 0.034484297 |
| Beta      | <i>SNHG25</i>     | 322.7872299 | 1.959593394    | 0.485523522 | 4.036042138  | 5.44E-05    | 0.034484297 |
| Beta      | <i>PPP1R1A</i>    | 1641.904587 | -1.480441025   | 0.368669524 | -4.01563169  | 5.93E-05    | 0.035843632 |
| Beta      | <i>CLTRN</i>      | 67.0088357  | -1.418664275   | 0.354363173 | -4.003419045 | 6.24E-05    | 0.035843632 |
| Beta      | <i>FTSJ3</i>      | 33.04773568 | 0.886188899    | 0.221725378 | 3.996786051  | 6.42E-05    | 0.035843632 |
| Beta      | <i>LINC01091</i>  | 45.76727102 | -2.068738401   | 0.520485563 | -3.974631667 | 7.05E-05    | 0.036050251 |
| Beta      | <i>PCDH10</i>     | 16.89057168 | 1.817817188    | 0.45742851  | 3.973991883  | 7.07E-05    | 0.036050251 |
| Beta      | <i>GRASP</i>      | 57.03532455 | -1.175493195   | 0.297147851 | -3.95592023  | 7.62E-05    | 0.036050251 |
| Beta      | <i>ACHE</i>       | 12.91230095 | 1.741513469    | 0.440412274 | 3.954280052  | 7.68E-05    | 0.036050251 |
| Beta      | <i>MPZL3</i>      | 41.77797811 | 1.034426503    | 0.261746237 | 3.952020528  | 7.75E-05    | 0.036050251 |
| Beta      | <i>HCN4</i>       | 13.03978854 | -1.693612892   | 0.42963124  | -3.942015232 | 8.08E-05    | 0.036375568 |
| Beta      | <i>PFKFB3</i>     | 16.92456644 | 1.132633995    | 0.292871396 | 3.867342489  | 0.000110028 | 0.045386897 |
| Beta      | <i>CBLB</i>       | 26.42202259 | 0.944084615    | 0.244206487 | 3.865927667  | 0.000110668 | 0.045386897 |
| Beta      | <i>SLC05A1</i>    | 82.80316868 | 0.903360518    | 0.233702392 | 3.865431205  | 0.000110893 | 0.045386897 |
| Beta      | <i>AC009404.1</i> | 21.81774607 | 0.962194828    | 0.249334127 | 3.859057881  | 0.000113825 | 0.045386897 |
| Beta      | <i>NSG1</i>       | 126.0805933 | -1.307947498   | 0.341020229 | -3.835395638 | 0.000125362 | 0.046247356 |
| Beta      | <i>NRP1</i>       | 18.7169234  | 1.441103188    | 0.375869507 | 3.834051874  | 0.00012605  | 0.046247356 |
| Beta      | <i>KIF19</i>      | 13.0143374  | 1.736887629    | 0.45320268  | 3.832474307  | 0.000126861 | 0.046247356 |
| Beta      | <i>AC010624.5</i> | 31.35422601 | 2.385596494    | 0.62400972  | 3.823011752  | 0.000131831 | 0.046247356 |
| Beta      | <i>ITGA10</i>     | 14.36301881 | -1.563365049   | 0.409142248 | -3.821079481 | 0.000132869 | 0.046247356 |
| Beta      | <i>FKBP11</i>     | 542.3588243 | -1.231374781   | 0.322723179 | -3.815575889 | 0.000135866 | 0.046247356 |
| Beta      | <i>ARSE</i>       | 12.6320176  | -1.957642426   | 0.514331987 | -3.80618448  | 0.000141127 | 0.046785083 |
| Beta      | <i>ROR2</i>       | 14.85277542 | 1.905303056    | 0.501271968 | 3.800936774  | 0.00014415  | 0.046785083 |
| Beta      | <i>ASCL2</i>      | 159.7775043 | -1.828375467   | 0.482233571 | -3.791472797 | 0.000149757 | 0.047500056 |
| Beta      | <i>PTCH2</i>      | 9.338860927 | 1.254567749    | 0.332694049 | 3.77093535   | 0.000162637 | 0.048098692 |
| Beta      | <i>COASY</i>      | 123.937415  | 0.531768236    | 0.141104679 | 3.7686081    | 0.00016416  | 0.048098692 |
| Beta      | <i>ANKRD44</i>    | 20.26716461 | 1.014376158    | 0.269375535 | 3.765658079  | 0.000166111 | 0.048098692 |
| Beta      | <i>EIF1AY</i>     | 259.1886658 | 4.343822189    | 1.155861235 | 3.758082767  | 0.00017122  | 0.048098692 |
| Beta      | <i>LINC01612</i>  | 28.79611131 | -1.724500595   | 0.45958948  | -3.752262984 | 0.000175245 | 0.048098692 |

|             |                   |             |              |             |              |             |             |
|-------------|-------------------|-------------|--------------|-------------|--------------|-------------|-------------|
| Beta        | <i>SRSF3</i>      | 435.7291719 | 0.662697344  | 0.176623098 | 3.752042351  | 0.0001754   | 0.048098692 |
| Beta        | <i>MGAT4C</i>     | 22.70346385 | -0.95755491  | 0.255244842 | -3.751515219 | 0.000175769 | 0.048098692 |
| Beta        | <i>OSBPL1A</i>    | 11.85821258 | 1.406170616  | 0.375438722 | 3.745406467  | 0.000180102 | 0.04833659  |
| Beta        | <i>PPRC1</i>      | 22.43190346 | 0.758375742  | 0.203244278 | 3.731351001  | 0.000190456 | 0.049772555 |
| Beta        | <i>WNT3</i>       | 10.83928463 | 1.302404247  | 0.34930588  | 3.72854945   | 0.000192585 | 0.049772555 |
| Beta        | <i>FNDC9</i>      | 16.06531908 | 1.89801441   | 0.511530964 | 3.71045849   | 0.000206884 | 0.051558933 |
| Beta        | <i>MPST</i>       | 36.57338637 | -0.913329429 | 0.246337929 | -3.707628109 | 0.00020921  | 0.051558933 |
| Beta        | <i>SLC35A2</i>    | 60.40691366 | 0.591213503  | 0.15952988  | 3.705973478  | 0.00021058  | 0.051558933 |
| Beta        | <i>FKBP14</i>     | 64.74044615 | 0.79840831   | 0.216089289 | 3.694807422  | 0.000220054 | 0.052120219 |
| Beta        | <i>TNFRSF18</i>   | 7.026601564 | 1.771970579  | 0.479627231 | 3.694474508  | 0.000220342 | 0.052120219 |
| Beta        | <i>TNK2</i>       | 52.89371334 | 0.693902963  | 0.188824908 | 3.674848675  | 0.00023799  | 0.054845683 |
| Beta        | <i>MAP2K3</i>     | 122.8795081 | 0.906699841  | 0.247087444 | 3.669550452  | 0.000242977 | 0.054845683 |
| Beta        | <i>FSTL4</i>      | 20.29538314 | 1.518723138  | 0.413951894 | 3.66883969   | 0.000243654 | 0.054845683 |
| Beta        | <i>TRA2A</i>      | 186.926684  | 0.815075828  | 0.225767413 | 3.610245684  | 0.000305907 | 0.067113431 |
| Beta        | <i>THUMPD2</i>    | 97.26948415 | 0.765489775  | 0.212125217 | 3.608669385  | 0.000307772 | 0.067113431 |
| Beta        | <i>TBC1D9</i>     | 123.5220609 | 0.581213011  | 0.161658228 | 3.595319682  | 0.000323993 | 0.069563892 |
| Beta        | <i>SLC31A1</i>    | 104.181445  | 0.559442852  | 0.15592916  | 3.587801359  | 0.000333478 | 0.07051548  |
| Beta        | <i>AP001439.1</i> | 10.5617112  | 1.613071867  | 0.450689258 | 3.57912206   | 0.00034475  | 0.071217026 |
| Beta        | <i>ADAMTS5</i>    | 18.53407296 | 1.12150029   | 0.313494129 | 3.577420397  | 0.000347002 | 0.071217026 |
| Beta        | <i>TMEM51-AS1</i> | 6.552649965 | 1.305353888  | 0.36957757  | 3.532015993  | 0.000412404 | 0.08255954  |
| Beta        | <i>FOCAD-AS1</i>  | 4.341792294 | 1.461330608  | 0.413865479 | 3.530931385  | 0.000414099 | 0.08255954  |
| Beta        | <i>DKK3</i>       | 69.73406749 | 2.059697211  | 0.585211632 | 3.519576675  | 0.000432236 | 0.084961785 |
| Beta        | <i>AGAP4</i>      | 10.95742733 | 1.080716798  | 0.307739535 | 3.511790569  | 0.000445099 | 0.085381108 |
| Beta        | <i>AC124016.2</i> | 12.54433935 | 1.164945169  | 0.331948246 | 3.509418062  | 0.000449088 | 0.085381108 |
| Beta        | <i>PCDHB3</i>     | 8.581755452 | 1.023152167  | 0.29172292  | 3.507273848  | 0.000452723 | 0.085381108 |
| Beta        | <i>PDLIM2</i>     | 222.5706734 | -1.050519897 | 0.300461953 | -3.496349162 | 0.000471671 | 0.086076158 |
| Beta        | <i>AC015912.3</i> | 26.75075283 | 1.238212844  | 0.354184809 | 3.495951297  | 0.000472375 | 0.086076158 |
| Beta        | <i>AL390816.2</i> | 13.49210845 | 1.258587662  | 0.360160176 | 3.49452201   | 0.000474911 | 0.086076158 |
| Beta        | <i>AC103591.3</i> | 16.15249646 | 1.751169109  | 0.506371836 | 3.458267198  | 0.000543662 | 0.09727366  |
| Beta        | <i>LINC01146</i>  | 22.36545884 | -1.282695    | 0.371459933 | -3.453118051 | 0.000554146 | 0.097894527 |
| Endothelial | <i>CRTC2</i>      | 7.345997275 | 1.240798432  | 0.287876896 | 4.310170239  | 1.63E-05    | 0.084500779 |



Supplemental Table 10: Significantly enriched pathways in T2D beta cells (GSEA)

| Pathway                                                               | Database | pval       | padj       | log2err    | ES         | NES        | size |
|-----------------------------------------------------------------------|----------|------------|------------|------------|------------|------------|------|
| ATP_SYNTHESIS_COUPLED_ELECTRON_TRANSPORT                              | GOBP     | 5.60E-08   | 0.00061868 | 0.71951283 | -0.720199  | -2.163344  | 92   |
| VALINE_LEUCINE_AND_ISOLEUCINE_DEGRADATION                             | KEGG     | 1.45E-06   | 0.00802256 | 0.64355184 | -0.810528  | -2.0813943 | 40   |
| OXIDOREDUCTION_DRIVEN_ACTIVE_TRANSMEMBRANE_TRANSPORTER_ACTIVITY       | GOMF     | 2.65E-06   | 0.00976191 | 0.62725674 | -0.7424831 | -2.0917061 | 67   |
| METABOLIC_DISORDERS_OF_BIOLOGICAL_OXIDATION_ENZYMES                   | REACTOME | 4.80E-06   | 0.01325471 | 0.61052688 | 0.95386338 | 1.73874141 | 16   |
| PARKINSONS_DISEASE                                                    | KEGG     | 6.36E-06   | 0.01405711 | 0.61052688 | -0.6197638 | -1.894842  | 114  |
| CELLULAR_RESPONSE_TO_TOXIC_SUBSTANCE                                  | GOBP     | 8.65E-06   | 0.01592261 | 0.59332548 | -0.697791  | -1.9841884 | 71   |
| ELECTRON_TRANSFER_ACTIVITY                                            | GOMF     | 1.37E-05   | 0.02166964 | 0.59332548 | -0.6265914 | -1.9025508 | 100  |
| METABOLISM_OF_AMINO_ACIDS_AND_DERIVATIVES                             | REACTOME | 3.69E-05   | 0.04609614 | 0.55733224 | -0.4993765 | -1.6071716 | 198  |
| RESPIRATORY_ELECTRON_TRANSPORT                                        | REACTOME | 3.84E-05   | 0.04609614 | 0.55733224 | -0.6158843 | -1.8873371 | 103  |
| PROTEIN_HORMONE_RECEPTOR_ACTIVITY                                     | GOMF     | 4.17E-05   | 0.04609614 | 0.55733224 | 0.98006208 | 1.61126051 | 8    |
| MRNA_PROCESSING                                                       | GOBP     | 4.71E-05   | 0.04726713 | 0.55733224 | 0.58627079 | 1.38964971 | 431  |
| POSITIVE_REGULATION_OF_CELL_GROWTH                                    | GOBP     | 5.85E-05   | 0.05328325 | 0.55733224 | 0.70092343 | 1.58957941 | 106  |
| RESPIRATORY_ELECTRON_TRANSPORT_ATP_SYNTHESIS_BY_CHEMIOSMOTIC_COUPLING | REACTOME | 6.27E-05   | 0.05328325 | 0.5384341  | -0.5715231 | -1.7609624 | 124  |
| GLUTATHIONE_METABOLISM                                                | KEGG     | 7.68E-05   | 0.06059718 | 0.5384341  | 0.83453396 | 1.66638318 | 33   |
| ORGANIC_ACID_CATABOLIC_PROCESS                                        | GOBP     | 8.66E-05   | 0.06380256 | 0.5384341  | -0.4976487 | -1.538802  | 175  |
| OXIDATIVE_PHOSPHORYLATION                                             | KEGG     | 0.0001038  | 0.06819241 | 0.5384341  | -0.577241  | -1.7807608 | 117  |
| RNA_SPLICING                                                          | GOBP     | 0.000106   | 0.06819241 | 0.5384341  | 0.59295148 | 1.40507987 | 401  |
| MITOCHONDRIAL_RESPIRATORY_CHAIN_COMPLEX_ASSEMBLY                      | GOBP     | 0.00011108 | 0.06819241 | 0.5384341  | -0.5837966 | -1.7917727 | 98   |
| RESPONSE_TO_GROWTH_FACTOR                                             | GOBP     | 0.00014455 | 0.08406711 | 0.51884808 | 0.57430763 | 1.36161055 | 435  |
| TRANSLATION_FACTOR_ACTIVITY_RNA_BINDING                               | GOMF     | 0.00018683 | 0.09164137 | 0.51884808 | 0.71749303 | 1.58726046 | 81   |
| NEGATIVE_REGULATION_OF_EXTRINSIC_APOPTOTIC_SIGNALING_PATHWAY          | GOBP     | 0.00019148 | 0.09164137 | 0.51884808 | 0.74456608 | 1.60094552 | 60   |
| ANTIOXIDANT_ACTIVITY                                                  | GOMF     | 0.00019755 | 0.09164137 | 0.51884808 | -0.7273198 | -1.9165012 | 47   |
| OXIDATIVE_PHOSPHORYLATION                                             | GOBP     | 0.00020427 | 0.09164137 | 0.51884808 | -0.5359029 | -1.6575983 | 134  |
| POSITIVE_REGULATION_OF_GROWTH                                         | GOBP     | 0.00021587 | 0.09164137 | 0.51884808 | 0.65817553 | 1.51669586 | 151  |
| CELLULAR_OXIDANT_DETOXIFICATION                                       | GOBP     | 0.00022689 | 0.09164137 | 0.51884808 | -0.6754793 | -1.8206045 | 57   |
| DETOXIFICATION                                                        | GOBP     | 0.00023074 | 0.09164137 | 0.51884808 | -0.6382984 | -1.8220044 | 72   |
| HORMONE_LIGAND_BINDING_RECEPTORS                                      | REACTOME | 0.00023154 | 0.09164137 | 0.51884808 | 0.99992749 | 1.31106734 | 1    |
| LOW_DENSITY_LIPOPROTEIN_PARTICLE_RECEPTOR_BINDING                     | GOMF     | 0.00023913 | 0.09164137 | 0.51884808 | 0.89770741 | 1.64732015 | 17   |
| PHASE_II_CONJUGATION_OF_COMPOUNDS                                     | REACTOME | 0.00024051 | 0.09164137 | 0.51884808 | 0.76753771 | 1.61016547 | 50   |
| DEVELOPMENTAL_CELL_GROWTH                                             | GOBP     | 0.00026316 | 0.0969323  | 0.49849311 | 0.65387664 | 1.50678952 | 151  |

Supplemental Table 11: Overlap in genes with differential expression across studies

| T1D beta scRNA-seq                                 | T1D alpha scRNA-seq                                | T2D beta scRNA-seq | T2D alpha scRNA-seq           | T2D beta bulk                         |
|----------------------------------------------------|----------------------------------------------------|--------------------|-------------------------------|---------------------------------------|
| <b>Elgamal &amp; Fasolino (pseudobulk)</b>         | <b>Elgamal &amp; Bosi</b>                          | No overlaps.       | <b>Bosi &amp; Segerstolpe</b> | <b>Elgamal &amp; Solimena OD</b>      |
| CD74                                               | PSMB9                                              |                    | C12orf57                      | PPP1R1A                               |
| HLA-C                                              | BAG1                                               |                    | CHORDC1                       | ASCL2                                 |
| HLA-A                                              |                                                    |                    | NAA38                         | NSG1                                  |
| B2M                                                | <b>Elgamal &amp; Fasolino (pseudobulk)</b>         |                    | C4orf48                       |                                       |
| PSMB8                                              | TYMP                                               |                    | POLR2L                        | <b>Elgamal &amp; Solimena PPP</b>     |
| ZFP36                                              |                                                    |                    | TUBA1B                        | ASCL2                                 |
|                                                    | <b>Elgamal &amp; Fasolino (edgeR/TooManyCells)</b> |                    |                               |                                       |
| SLC4A4                                             | TYMP                                               |                    | TTC3                          | DKK3                                  |
| LDHA                                               | GHRL                                               |                    | PRKAR1A                       | PPP1R1A                               |
| RGS4                                               | ODF3B                                              |                    | HOOK3                         | TSHR                                  |
| TYMP                                               | GBP2                                               |                    | VIM                           | HCN4                                  |
| DLK1                                               | ANXA3                                              |                    |                               | NSG1                                  |
| CNN3                                               | HES1                                               |                    |                               | WNT3                                  |
| PLK2                                               | PSMB9                                              |                    |                               | CHD5                                  |
| LMCD1                                              | UTRN                                               |                    |                               | TMED6                                 |
| CLU                                                |                                                    |                    |                               |                                       |
|                                                    |                                                    |                    |                               | <b>Solimena OD &amp; Solimena PPP</b> |
| GTF2H2                                             | ZFP36                                              |                    |                               | HHATL                                 |
| LY6E                                               | HSPA6                                              |                    |                               | SLC2A2                                |
| RNF213                                             | BET1                                               |                    |                               | PPP1R1A                               |
| GATM                                               | TAP1                                               |                    |                               | ARG2                                  |
|                                                    | BAG1                                               |                    |                               |                                       |
| <b>Elgamal &amp; Fasolino (edgeR/TooManyCells)</b> |                                                    |                    |                               |                                       |
| CD74                                               | AC099509.1                                         |                    |                               | FBXO32                                |
|                                                    | HIST2H2AA4                                         |                    |                               | CHL1                                  |
| HLA-C                                              | PRSS2                                              |                    |                               | OTTHUMG00000003650                    |
| HLA-F                                              | TFF3                                               |                    |                               | /// RP1-212P9.2                       |
| HLA-A                                              | MT1G                                               |                    |                               | ASCL2                                 |
| HLA-B                                              | ASGR1                                              |                    |                               | CAPN13                                |
| B2M                                                | HSPA1A                                             |                    |                               | TMEM37                                |
|                                                    |                                                    |                    |                               | SCTR                                  |
| HLA-E                                              | CPA1                                               |                    |                               | CTB-12O2.1 ///                        |
| STOM                                               | PLEKHA1                                            |                    |                               | OTTHUMG000000163523                   |
| PSMB8                                              | CRYAB                                              |                    |                               | PDK4                                  |
| GABRG2                                             | B2M                                                |                    |                               | FAM102B                               |
| PSMB8-AS1                                          | SEC16A                                             |                    |                               | KCNH8                                 |
| PSMB9                                              | RGS4                                               |                    |                               | FFAR4                                 |
| GAD1                                               | EIF3B                                              |                    |                               | ANKRD23 /// ANKRD39                   |
| TUBB2B                                             |                                                    |                    |                               | UNC5D                                 |
|                                                    |                                                    |                    |                               | GAP43                                 |
|                                                    | <b>Bosi &amp; Fasolino (edgeR/TooManyCells)</b>    |                    |                               |                                       |
| MDK                                                | DOHH                                               |                    |                               | RGS16                                 |
| GAST                                               | THAP11                                             |                    |                               | CD44                                  |
| ZFP36                                              | PPP1R16A                                           |                    |                               | NSG1                                  |
| BIRC3                                              | CTSL                                               |                    |                               | PCDH20                                |
| CASP4                                              | PEMT                                               |                    |                               | G6PC2                                 |
| TMEM45B                                            | PIGH                                               |                    |                               | DAB1                                  |
| IL18BP                                             | RPS23                                              |                    |                               |                                       |
| CTSL                                               | CPT2                                               |                    |                               | <b>Elgamal &amp; Wigger PPP</b>       |
| MT1X                                               | NOP10                                              |                    |                               | TSHR                                  |
| FBXO22                                             | LAPTM4A                                            |                    |                               | LINC01116                             |
| LRCH2                                              | DMWD                                               |                    |                               | STOM                                  |
| SLC38A1                                            | FAM219B                                            |                    |                               | GOLT1A                                |
| AQP3                                               | RPL29                                              |                    |                               | CHD5                                  |
| GNS                                                | CALR                                               |                    |                               | PPP1R1A                               |
| SLC4A4                                             | TUFM                                               |                    |                               | CLTRN                                 |
| FABP5                                              | RPL30                                              |                    |                               | HCN4                                  |
| NCOA7                                              | LOXL1                                              |                    |                               | PFKFB3                                |
| AKAP12                                             | MGAT4A                                             |                    |                               | NSG1                                  |
| CHGB                                               | PLEKHF2                                            |                    |                               | LINC01612                             |
| SAMD5                                              | SCAMP4                                             |                    |                               | WNT3                                  |
| SYT1                                               | TMEM147                                            |                    |                               | DKK3                                  |
| KCNJ8                                              |                                                    |                    |                               |                                       |
|                                                    |                                                    |                    |                               | <b>Solimena OD &amp; Wigger PPP</b>   |
| RPL3                                               | KCTD18                                             |                    |                               | HHATL                                 |
| SCN3A                                              | RPL38                                              |                    |                               | SLC2A2                                |
| PTP4A3                                             | DNAJC8                                             |                    |                               | PPP1R1A                               |
| ICAM1                                              | SNTA1                                              |                    |                               |                                       |

|              |           |                                  |
|--------------|-----------|----------------------------------|
| PPP1R1A      | HSP90AA1  | ARG2                             |
| DDK3         | DDX18     | IAPP                             |
| PPP2R2B      | MT-ND5    | GLP1R                            |
| PPY          | HES6      | IFI16                            |
| SELENOW      | STXBP2    | FXD1                             |
| CD40         | TMEM60    | CHL1                             |
| IRF1         | PALLD     | SH3BP2                           |
| MSN          | HINT1     | CAPN13                           |
| EPAS1        | RPL39     | TSPAN1                           |
| PRKAG2-AS1   | RHOA      | VAT1L                            |
| SPOCK1       | PA2G4     | TMEM37                           |
| CTSS         | CSTB      | PPM1E                            |
| SEL1L3       | GAPDH     | ANKRD34C                         |
| PARVB        | TPM3      | SOX4                             |
| AL109613.1   | NDUFA6    | SLC5A1                           |
| LDHA         | PRNP      | ZFP36L1                          |
| RGS4         | ZNF706    | WSCD2                            |
| CLTRN        | CYCS      | FAM102B                          |
| TMEM161B-AS1 | ZDHHC12   | CTNNA2                           |
| ISL1         | PDCD5     | GPM6A                            |
| MT2A         | ASPHD1    | KCNH8                            |
| MTUS1        | SERF2     | SLC16A9                          |
| SOD1         | GLRX      | FFAR4                            |
| BTN3A2       | LYPLA1    | ADCYAP1                          |
| HIST2H2AA4   | HSPA9     | UNC5D                            |
| BAA1C        | ING3      | LPCAT2                           |
| CETN3        | TAF9      | NAALAD2                          |
| BRD8         | LSM7      | ESR1                             |
| AK4          | RP9       | CXCL12                           |
| MLLT6        | MRPL4     | NSG1                             |
| SMOC1        | CHMP2B    | ASB9                             |
| DBI          | TARS      | G6PC2                            |
| TENM3        | TCEAL1    | BIRC3                            |
| RAB27A       | C9orf16   | ZPLD1                            |
| GTF2A1       | TIMP2     | EFEMP1                           |
| TXNDC12      | CAPZA2    |                                  |
|              |           | <b>Solimena PPP &amp; Wigger</b> |
|              |           | <b>PPP</b>                       |
| ASB9         | BLOC1S6   | PCOLCE2                          |
| TGFBFR3L     | HSP90AB1  | ALDOB                            |
| DPYSL3       | TMEM38B   | ARG2                             |
| GAMT         | BCAS2     | TMEM37                           |
| CITED1       | MAPRE1    | SLC2A2                           |
| SUMF2        | LSM1      | PRIMA1                           |
| DGCR6L       | RPN2      | DDK3                             |
| ZNF33A       | CYSTM1    | FAIM2                            |
| LMO4         | SNRPD1    | FAM19A4                          |
| ATG12        | MRPL47    | SLC26A4                          |
| CELSR3       | RPL36A    | PPP1R1A                          |
| LINC00685    | GNG4      | CYS1                             |
| TMEM54       | TMEM192   | CHL1                             |
| ASCL2        | SSBP1     | MRO                              |
| SCAF11       | RRAGD     | RASGRP1                          |
| TAPBP1       | SVIP      | ACRBP                            |
| SERP1        | MLF1      | IRF8                             |
| TMEM37       | RSL24D1   | TSHR                             |
| EYA3         | NDUFB7    | HS6ST2                           |
| DNAJC22      | GCSH      | NTN1                             |
| TNFRSF11B    | TXN       | KCNAB2                           |
| HMG2         | KIF1A     | MIOX                             |
| MT1F         | SF3B5     | TMEM150C                         |
| SPG11        | RHBDD2    | RDH10                            |
| ID2          | CHMP3     | HHATL                            |
| ZRANB2       | ATP6V1A   | PLA1A                            |
| TLE4         | WDR83OS   | GAD1                             |
| SMC6         | LINC00526 | HCN4                             |
| ZSWIM6       | FGFR10P2  | NSG1                             |
| SCG2         | HNRNP     | NHLH2                            |
| S100A6       | NDUFAB1   | GALNT10                          |
| GLDR         | SNRPC     | PDE4B                            |
| IL13RA1      | F10       | C3orf70                          |
| TSPAN1       | RPS3A     |                                  |

MAN2B2  
TYMP  
GRAMD4  
RIF1  
RSRP1  
UBE2S  
ZNF480  
LINC00324  
MDFIC  
EHF  
RARS  
PLXNB2  
BCAT2  
IAPP  
GNG12  
UNC5B  
ABCB4  
TRIP10  
DYNC2L1  
LGALS3BP  
LGMN  
DLK1  
MAP2  
FHL1  
RGS17  
LUC7L3  
ZC3H13  
RBM38  
GCSH  
SETX  
MSMB  
ERF  
FIGN  
PLD3  
LSG1  
PCNX4  
PRPF38A  
GGT7  
ZNF317  
SMPD3  
TRMU  
SPTY2D1  
QSOX1  
FLT3LG  
ENTPD3  
FOXO3  
  
FUT11  
SST  
C12orf75  
SPATS2L  
ZNF462

CHGB  
PET100  
COMT  
TCEAL4  
ERP29  
PSMB9  
SERBP1  
PSMA7  
BRD2  
HMGB1  
ROMO1  
SSR1  
TMSB10  
DDX1  
C1orf43  
GOT1  
VDAC2  
CELA3A  
DDIT3  
CD99  
NDUFB4  
LAMTOR1  
TRMT112  
SCGB2A1  
KRTCAP2  
POLR2K  
RPS20  
SLC3A2  
UBXN4  
KRT8  
JOSD2  
AGPAT5  
TMED1  
CAMK2N2  
HLA-A  
SERTAD1  
C4orf48  
PFN1  
HMG1  
GNB2  
SRSF9  
SCAND1  
KRT10  
MRPL23  
PTMS  
EIF5A  
  
DUSP1  
NPDC1  
TUSC3  
SRSF2  
GADD45GIP1

LLPH  
ZCCHC3  
TMEM176A  
POLD3  
HSPA2  
SCO1  
NSG1  
PPT1  
SSX2IP  
SCN2A  
IRF2  
ANKRD37  
LINC01116  
PRKAB2  
RPF1

NBL1  
C1QBP  
INSIG1  
TXNIP  
JUNB  
PCSK1N  
RASD1  
NENF  
RANBP1  
TMEM160  
IDI1  
SLC36A4  
PCP4  
UBALD2  
UQCRCF51

LINC01315

MAP2K2

FFAR4  
SLC4A7  
CDKN1A  
PCSK9  
WNT3  
CAPN13  
ARL4C  
HIP1  
TMEM132C  
SULF1  
RNF6  
RUNX2  
UNC5D  
TSPAN5  
ZNF578  
MLIP  
TGFB3  
AGT  
KCNH8  
SLC24A3  
ONECUT2  
RYSR  
MLPH  
LY96  
FAM102B  
TTC39C  
ARHGAP22  
ZMAT4  
G6PC2  
PFKFB2  
ITGB2  
DIO2  
ADAM19  
SAMS1  
PAPPA  
EPHA3  
PTPRC  
CHD5  
CH25H  
COL1A1  
VCAN  
STAB1  
C3  
TPH1  
KCNE4

Elgamal & Solimena OD  
& Solimena PPP  
PPP1R1A  
ASCL2  
NSG1

Solimena OD & Solimena  
PPP & Wigger PPP  
HHATL  
SLC2A2  
PPP1R1A  
ARG2  
CHL1  
CAPN13  
TMEM37  
FAM102B  
KCNH8  
FFAR4  
UNC5D  
NSG1  
G6PC2

Elgamal & Solimena OD  
& Wigger PPP

|            |          |
|------------|----------|
| RTN4       | BAG1     |
| ZCCHC2     | MRPS34   |
| NAGA       | PPP1R1A  |
| CTC1       | PTPRN2   |
| RASGRF1    | SLC2A4RG |
| TRIM27     | FEV      |
| MPHOSPH10  | TERF2IP  |
| CREBBP     | KCNMA1   |
| BNIP3      | CST3     |
| USP47      | IGFBP2   |
| TMEM176B   | C1QTNF4  |
| STAU2      | TMX4     |
| MPPE1      | CYC1     |
| FCHO2      | CALY     |
| ABCC9      | PCBP2    |
| AC142472.1 | CBX6     |
| GCNT1      | SRSF5    |
| SP4        | C1orf122 |
| ZNF384     | GNAI2    |
| MLF1       | PRSS3    |
| PRRG4      | CPE      |
| SCPEP1     | PCSK2    |
| TMEM14A    | CHGA     |
| MUC13      | EGR1     |
| MESP1      | REG3A    |
| SYNC       | AKR7A2   |
| NFKB1      | ITM2B    |
| FBXO28     | KLHDC2   |
| PTRHD1     | FTH1     |
| LRRC10B    | JUND     |
| TMEM154    | REG1B    |
| RIIAD1     | H2AFV    |
| C1orf53    | SLC7A8   |
| TMED6      | RPS2     |
| NGLY1      | PEG10    |
| BSG        | STUB1    |
| CTNNBL1    | MTCH1    |
| KANK1      | SLC30A8  |
| LRRCC1     | CRYBA2   |
| CD24       | SRP14    |
| CAPS       | PAM      |
| VPS13D     | UCHL1    |
| VWDE       | PAK3     |
| TSPAN33    | CTRB2    |
| SERP2      | DUT      |
| POC1B      | MARCKS   |
| AKR7A2     | IER2     |
| ENTPD6     | SPINT2   |
| CLDN3      | PRELID1  |
| NOL8       | KCMF1    |
| ZNF587     | ABHD15   |
| PHIP       | NUCKS1   |
| PTPMT1     | SRM      |
| ERAP1      | MLXIPL   |
| PCF11      | RPS29    |
| GPI        | PTPRT    |
| CHAC1      | UBXN6    |
| COX14      | ZDHHC24  |
| CHD5       | GSTA4    |
| BBX        | HNRNPH1  |
| RBBP7      | VPS26B   |
| CREB1      | SCD      |
| TNR        | MAGED1   |
| SLC30A1    | SESN3    |
| PREB       | DVL3     |
| UTP25      | INO80E   |
| CDK17      | CTNND2   |
| AP2B1      | SUDS3    |

PPP1R1A  
NSG1

**Elgamal & Solimena PPP  
& Wigger PPP**

TSHR  
CHD5  
PPP1R1A  
HCN4  
NSG1  
WNT3  
DKK3

**Elgamal & Solimena OD  
& Solimena PPP &  
Wigger PPP**

PPP1R1A  
NSG1

NT5C2  
EGFL7  
PBX3  
DIRAS3  
NAA15  
PCSK2  
PUM3  
HOPX  
PAR6A  
JOSD2  
PARP14  
ESF1  
BCDIN3D  
ADM  
ZNF608  
TAF2  
RNF7  
SHARPIN  
ARHGEF12  
CSTF3  
ERCC6L2  
SYT11  
POLR1C

SERTAD3  
STXBP5  
APLP2  
ZNF540  
AMMECR1  
HPCA  
ZNF512  
BCCIP  
LNPEP  
HSPB6

SEC61B  
PUS7L  
CENPX  
MYO9B

IRF2BPL  
PDLIM1  
GRN  
CASP7  
RIC1  
PDLIM4  
CEP350  
TTC14  
ATP6VOC  
GNG7  
SMC4  
VIM  
AP1S2  
EIF4G3  
MTFP1  
RPP25  
VMP1  
RASA2  
KIAA2026  
HHEX  
ZNF346  
DUSP1  
VSTM2L  
GXYLT1  
CEP290  
SRCAP  
GABRB3  
KCTD9  
ZC3H14  
PPP3CA

CTRB1  
C9orf24  
TSPYL2  
MISP  
PSPC1  
AGPAT2  
STX16  
UNC80  
TXNL4A  
GCH1  
DMTN  
SMARCA1  
ARL3  
KCNJ6  
ATXN10  
LMNA  
CDIPT  
UBE2Q2  
TUBA1A  
MOB1B  
MORF4L1  
CCAR1

**Fasolino (pseudobulk) & Fasolino  
(edgeR/TooManyCells)**

OLFM4  
CXCL2  
TYMP  
CCL2  
CXCL1  
IL32  
LCN2  
KRT7

**Elgamal & Bosi & Fasolino  
(edgeR/TooManyCells)**

PSMB9  
BAG1

**Elgamal & Fasolino (pseudobulk)  
& Fasolino (edgeR/TooManyCells)**

TYMP

SACS  
SRSF7  
TBL1XR1  
CS  
RNF214  
RPL7L1  
NCOA6  
HDAC7  
ZNF84  
MAGI3  
FOXP2  
CHD6  
ZER1  
PIAS4  
RAD50  
ZNF830  
RACK1  
DCAF5  
ARHGAP5  
MUC12  
ELP3  
GPM6B  
SYNE2  
ARID4B  
LAMP2  
STAG1  
PBX1  
TNRC6C  
AC051619.5  
FHDC1  
BAZ2A  
SGMS2  
PMVK  
SMARCC2  
ACIN1  
PTK2B  
VCP1P1  
C17orf80  
TXNL4A  
MSI2  
CYB561D1  
FBXW7  
ZC3H8  
HMGB1  
GLE1  
CA11  
MBD6  
SAMD9  
TSC22D2  
CYR1  
OFD1  
PLK2  
INS  
LUCAT1  
KCNC4  
HRK  
NPNT  
JAM3  
VWA5A  
NSRP1  
C1QBP  
NCOA5  
NELFE  
CTCF  
ESRRG  
MT1E  
BCOR  
ZZEF1  
FAM174A  
INHBA  
RNF111

OSTC  
ESCO1  
CDC37L1-DT  
NUP62  
CAMK2D  
NUFIP2  
SRSF1  
TMEM192  
EDEM2  
S100PBP  
SETMAR  
PSAP  
KLHL35  
ECEL1  
GEMIN7  
TRAF6  
FAM229B  
IWS1  
PRPF40A  
SECISBP2  
ABCA1  
FAM168A  
TSPAN2  
AFTPH  
RALGAPA2  
HSPH1  
POLR2A  
ZNF226  
BRD2  
ZNF773  
FAU  
GRIN2A  
ZNF507  
SIPA1L1  
C6orf47  
DFFA  
TAF9  
TDRD9  
POP7  
IGSF1  
TUBA1A  
KIAA1324L  
BAZ2B  
DVL3  
ZNF621  
ZBTB49  
NBDY  
KCNJ6  
ITGAV  
PLPBP  
SASH1  
MCUB  
UBA6-AS1  
CYB5A  
MARF1  
POC5  
ZNF431  
QKI  
BAZ1A  
GAB2  
PHC1  
TCF4  
PRKACB  
ARL14EP  
MCRIP2  
SLC48A1  
TSHZ2  
STAMBP  
NAV1  
PIK3CA  
PHLPP2



C19orf18  
PET100  
TIFA  
HMBOX1  
TRNP1  
ZNF740  
ZNF618  
TJP2  
PAX6  
CHD4  
FAM214A  
AAMP  
ZC3H10  
IGSF10  
PROX1  
ARSA  
KLF3  
WDR82  
HTATSF1  
TMEM130  
QTRT2  
SMCR5  
LMCD1  
WDFY3  
STAT4  
JADE2  
CCND3  
FNDC3B  
ACSL4  
DHCR24  
CCDC93  
PFDN5  
DPH6  
CBLN4  
CLU  
WSB1  
SLC41A1  
SDC4  
GALNT7  
GTF2H2  
GBA  
MBD4  
RPS3A  
TEN1  
TMEM125  
CCDC88A  
ZNF573  
SETBP1  
RBMX  
ASF1A  
CAVIN3  
ASCL1  
MFSD11  
DHX15  
NCBP1  
ZNF37A  
PLXNA2  
PARP8  
GMEB1  
PHF21A  
ZNF383  
ZNF264  
AIMP1  
CARM1  
SURF2  
AC007029.1  
HEBP1  
TMEM140  
KIAA0319  
AHDC1  
ITPR3

QSER1  
ZNF721  
EMC10  
ZNF638  
GRWD1  
CASP8AP2  
FOXP4  
NPY  
LY6E  
DLGAP1-AS1  
STMN3  
Z82217.1  
LMNA  
ATP1B3  
CNIH2  
KLF10  
NCBP2  
BLZF1  
TOB2  
PRELID1  
CDK7  
RXRB  
ZNF766  
VPS45  
NUDC  
EIF2AK2  
TMEM8A  
ELL2  
FGD6  
HERPUD1  
PEBP1  
DPY19L3  
GINM1  
EP300  
KNOP1  
KCTD8  
AC073508.3  
NUBP1  
ITFG2  
AL353719.1  
IFIH1  
TUBG2  
SRF  
ERICH5  
CDKN2C  
SCMH1  
TCF20  
TPR  
KIAA0040  
ZNF709  
USP53  
SERPINA1  
TRIM38  
RPS6  
NDUFB10  
NFRKB  
MEGF9  
RRAGA  
TESC  
ACVR2A  
ZFYVE16  
UBLCP1  
MMAA  
NUP50  
CD47  
EMSY  
CCDC137  
JAGN1  
WDFY1  
NME2  
GADD45GIP1

PLSCR1  
SFT2D2  
TNK2  
CISD2  
KDM3A  
ASH1L  
KLHL8  
GLI4  
PPME1  
BMP5  
TNS2  
ZNF347  
SDF2L1  
DDX55  
PI4KB  
TMEM259  
SF3B5  
PLOD2  
KIAA0355  
PGM2L1  
SLC38A2  
ADPRHL2  
ZNF286A  
LY6H  
NUP35  
TMPO  
MAPK8IP2  
AC093673.1  
KPNA5  
NCOR1  
UCHL1  
SLC7A2  
HYI  
ZXDC  
AC108134.2  
UNC80  
INO80B  
TMEM187  
TRIM23  
APBP2  
PYGB  
RPAP2  
AKR1A1  
RBPJ  
ARID1B  
ZNHIT2  
PRKAA2  
MED8  
CTTNBP2  
CD274  
ATP5MC3  
MED29  
PDK3  
MPST  
IKBKB  
ATAD2B  
CDK19  
AL390955.2  
TMEM132D  
TOM1  
SLC46A3  
KIZ  
ATP6V1F  
ATP9A  
UBXN2B  
SOCS1  
GRINA  
LYST  
FAM193A  
ZCCHC9  
ANKRA2

CNP  
CLSTN1  
SCML1  
RPRD2  
UHRF1BP1  
MAP3K8  
HSD17B11  
TMA16  
DTD2  
THUMPD2  
EXOC6  
ARV1  
CRB3  
ID1  
PIGM  
SERPINI1  
ZNF124  
BAG1  
LEMD3  
RBM6  
GBE1  
COMMD7  
PREPL  
ZNF445  
ZFYVE27  
PAPPA2  
NPC2  
PARP4  
GINS2  
BTN2A1  
DCUN1D1  
LARP7  
SLC25A4  
RPF2  
LBR  
DTNB  
INSR  
LDLRAD3  
SLC25A33  
RAD21  
CPNE4  
SMURF2  
INTS6  
RPL36AL  
C12orf60  
ASAH1  
ENPP5  
CD59  
ZNF281  
ITGB8  
CBX4  
ARFGEF1  
TCERG1  
FKBP11  
MYH10  
SMIM10L1  
ZNF609  
SEC61A2  
VGF  
ZNF200  
ODC1  
DDX59  
RAB30  
BAP1  
TBL2  
CD82  
THUMPD3-AS1  
ZNF780B  
DET1  
CHCHD10  
CSTF2T

DDIT4  
C12orf4  
SIN3A  
ARL6IP5  
ASXL3  
UFC1  
FBXO44  
KDM3B  
ARFGEF3  
AC139795.2  
MID1  
CDKN2A  
CCDC186  
IRAK4  
TMCO3  
GUF1  
NCBP3  
TRIM35  
RNF213  
ATE1  
NDUFC1  
RPP14  
FXVD2  
CLSTN3  
MPP1  
ZNF524  
AC132872.1  
MPC2  
ALS2  
PDS5B  
KDM4B  
TMEM63B  
PHLDA2  
SPPL2B  
LIG4  
USP15  
WASHC2A  
KDM6B  
DGKH  
BCL3  
SEC24B  
ARIH2  
PELI1  
PUS3  
SEPSECS-AS1  
ANKS1B  
GOT2  
VPS54  
SPECC1L  
TNRC6B  
RNF24  
FUT10  
SLCO5A1  
HIST3H2A  
ZNF782  
L3MBTL1  
RANBP3  
TKFC  
PACRGL  
TRIM56  
GATC  
APIP  
LIMCH1  
BTRC  
DNAJB9  
CEP170  
RANBP2  
CREBRF  
STRN  
LARP6  
ERN1

MZT2A  
ZNF318  
FICD  
PIGP  
USP24  
TMEM189  
SNHG10  
MRPL41  
MICALL1  
YY1  
GIGYF2  
FBXL2  
BMPR2  
KBTBD6  
AAR2  
SUPT16H  
MAD2L1BP  
ISY1  
GEMIN2  
IRS1  
EBPL  
TICAM2  
BRPF1  
GTF2H2C  
STUB1  
ATXN7L3  
RWDD4  
RBM12  
CFL2  
DESI1  
LIAS  
FBLN7  
SMCR8  
RPL12  
CLHC1  
NTAN1  
TNRC6A  
PLEKHA7  
CHCHD2  
GC  
GSE1  
AC092171.4  
HADH  
XPA  
PSMB7  
ATP5PO  
EPS15  
MTMR3  
COL6A1  
AC103691.1  
APOH  
EFNB3  
CCDC167  
SMAD5  
KLHL21  
HECA  
GCAT  
ATN1  
SNX3  
JUN  
THBD  
LDB1  
COX5A  
CACYBP  
THR8  
BRIX1  
C6orf62  
MTX1  
C2CD5  
PIGZ  
PDZD2

ZNF511  
RIPK1  
RBBP4  
TIA1  
PHF12  
SAMD4A  
AC007325.4  
AP3B1  
GTPBP4  
NOSIP  
AC009061.2  
SH2B3  
N4BP2  
NEUROD1  
EFTUD2  
FKBP14  
NDRG1  
PRRT2  
HPS3  
POLDIP3  
SENP1  
NAA16  
TOP2B  
ALKBH8  
USP30  
NTRK2  
ELF2  
TAOK2  
RPS3  
MPP5  
BORCS7  
TSTA3  
FRY  
AC004540.2  
FKBP4  
MAZ  
ZNF207  
POLR2J  
SRSF3  
NCAM1  
ARHGAP12

**Fasolino (pseudobulk) & Fasolino  
(edgeR/TooManyCells)**

CD74  
HLA-DRA  
RSAD2  
CXCL2  
B2M  
OLFM4  
TYMP  
RGS4  
PSMB8  
CCL2  
LMCD1  
ZFP36  
CLDN10  
ANXA4  
GSTA1  
PLK2  
IL32  
IFI6  
HIGD1A  
TSPAN8  
TM4SF1  
RNASEK  
MMD  
SYT13  
HLA-C  
PKIB  
CLU

TERF2  
CD44  
DEFB1  
FBXO32  
CXCL8  
NECTIN3  
ANXA2  
DLK1  
LDHA  
GTF2H2  
PDK4  
HLA-A  
MAFA  
SHISAL2B  
SNCB  
SPIRE1  
NBL1  
KRT8  
PCDH7  
DCBLD1  
RNF213  
SORL1  
REG3A  
SOD2  
REG1B  
PRUNE2  
GCG  
HES1  
KRT19  
EIF5A  
LY6E  
S100A10  
AC036176.1  
GAD2  
MZF1  
FXYS5  
LSAMP  
SEPT1  
SCD5  
HSBP1L1  
SERPING1  
SLC4A4  
ELF3

**Elgamal & Fasolino (pseudobulk)**  
**\* & Fasolino (edgeR/TooManyCells)**

CD74  
HLA-C  
HLA-A  
B2M  
PSMB8  
ZFP36  
SLC4A4  
LDHA  
RGS4  
TYMP  
DLK1  
PLK2  
LMCD1  
CLU  
GTF2H2  
LY6E  
RNF213
